# Supplementary material for: Ni-Catalyzed asymmetric hetero-Diels–Alder reactions of conjugated vinyl azides: synthesis of chiral azido polycycles
Source: Royal Society of Chemistry journal article supplement (doi:10.1039/d0qo01597k), 2021-01-01
Supplement: d0qo01597k1.pdf [file d0qo01597k1.pdf]

# Supporting Information

## Ni-catalyzed Asymmetric Hetero-Diels–Alder Reactions of Conjugated Vinyl Azides: Synthesis of Chiral Azido Polycycles

Shunian Li<sup>a</sup>, Haifeng Lu<sup>a</sup>, Zhenghu Xu<sup>\*, a, c</sup> and Fang Wei<sup>\*, b</sup>

[xuzh@sdu.edu.cn](mailto:xuzh@sdu.edu.cn)  
[weifang511@126.com](mailto:weifang511@126.com)

### CONTENT:

|                                                 |     |
|-------------------------------------------------|-----|
| 1. General Information.....                     | S2  |
| 2. Standard Procedure for the HDA Reaction..... | S2  |
| 3. Optimization for the HDA reaction.....       | S4  |
| 4. Procedure of synthetic applications.....     | S5  |
| 5. X-ray Crystallography Data.....              | S7  |
| 6. Characterization Data.....                   | S8  |
| 7. Supplementary spectra.....                   | S36 |
| 8. References.....                              | S84 |

## 1. General Information

Unless otherwise noted, analytic grade solvents were used for the chromatography, and all the reagents were obtained commercially and used without further purification. All reactions were performed under nitrogen atmosphere and in a flame-dried or oven-dried glassware with magnetic stirring. Reactions were monitored by TLC. Solvents were dried with CaH<sub>2</sub>. All NMR spectra were recorded on Bruker-500 MHz spectrometer. The chemical shifts ( $\delta$ ) and coupling constants (J) were expressed in ppm and Hz respectively. HRMS were measured on the Q-TOF6510 instruments.

### General Procedure for the Synthesis of Vinyl Azides

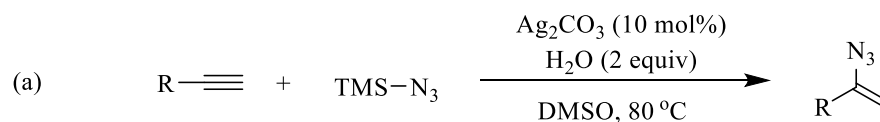

Vinyl Azides was prepared according to the reference.<sup>1</sup>

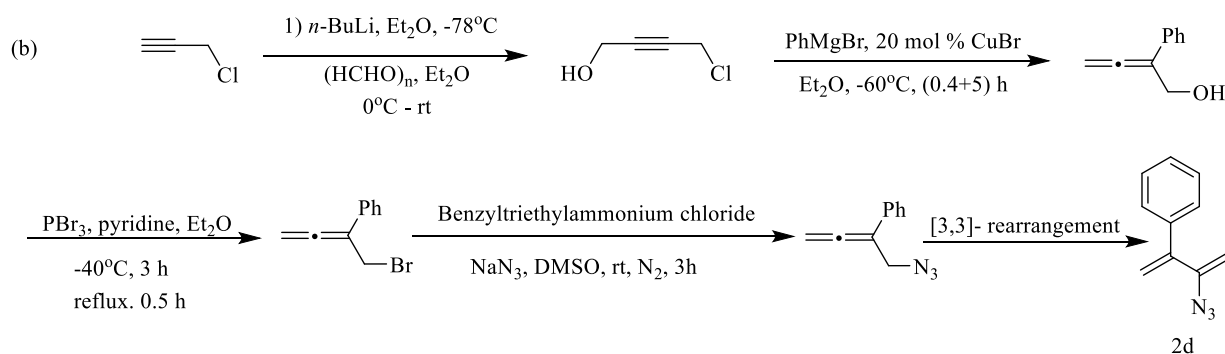

Vinyl Azides 2d was prepared according to the reference.<sup>2, 3, 4</sup>

$\alpha$ -keto esters were synthesized by reported methods,<sup>5</sup> and chiral N,N'-dioxide ligands were synthesized by reported methods.<sup>6</sup>

## 2. Standard Procedure for the HDA Reaction

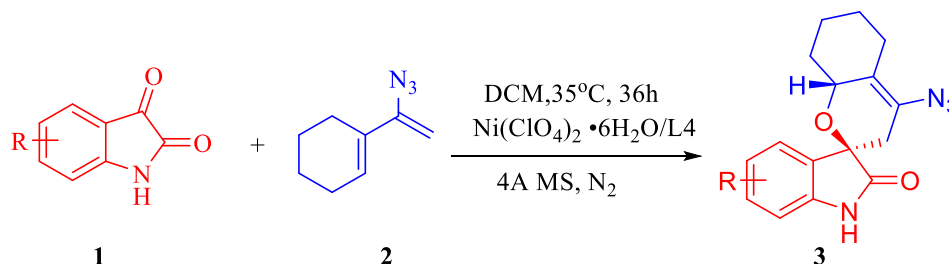

To a mixture of Ni(ClO<sub>4</sub>)<sub>2</sub>·6H<sub>2</sub>O (10 mol%), N,N'-dioxide ligand L4 (11 mol%), 1 (0.1 mmol), 4A MS (100 mg), 0.5 mL of DCM and 2 (1.2 eq) were added

under nitrogen atmosphere. The reaction mixture was stirred at 35 °C for 36h. After the reaction was completed, the reaction purified by column chromatography (silica gel, Petroleum ether/ EtOAc: 5/1 to 3/1) to afford the desired product **3**.

### 3. Optimization for the HDA reaction

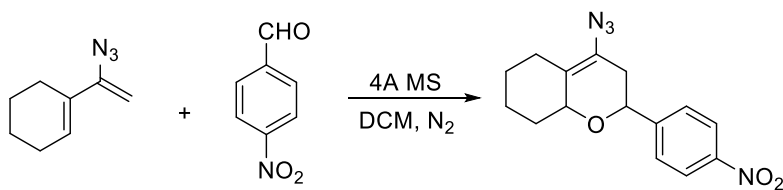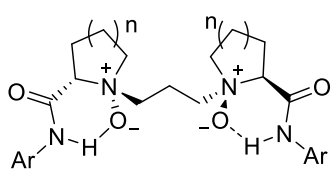

**L4:** Ar = 2,6-*i*-Pr<sub>2</sub>C<sub>6</sub>H<sub>3</sub>, n = 2

**L5:** Ar = 2,6-*i*-Pr<sub>2</sub>C<sub>6</sub>H<sub>3</sub>, n = 1

**L7:** Ar = 2,4,6-Me<sub>3</sub>C<sub>6</sub>H<sub>3</sub>, n = 2

**L8:** Ar = 2,4,6-Me<sub>3</sub>C<sub>6</sub>H<sub>3</sub>, n = 1

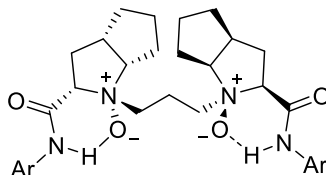

**L6:** Ar = 2,6-*i*-Pr<sub>2</sub>C<sub>6</sub>H<sub>3</sub>

**L9:** Ar = 2,4,6-Me<sub>3</sub>C<sub>6</sub>H<sub>3</sub>

| Entry     | Catalyst                  | Ligand    | Temperature/°C | Time/h    | Yield/%   | ee/%      |
|-----------|---------------------------|-----------|----------------|-----------|-----------|-----------|
| 1         | Sc(OTf) <sub>3</sub>      | L4        | RT             | 15        | 81        | 61        |
| 2         | Sc(OTf) <sub>3</sub>      | L7        | RT             | 15        | 61        | 38        |
| 3         | Sc(OTf) <sub>3</sub>      | L5        | RT             | 15        | 86        | 50        |
| 4         | Sc(OTf) <sub>3</sub>      | L8        | RT             | 15        | 26        | 24        |
| 5         | Sc(OTf) <sub>3</sub>      | L6        | RT             | 15        | 75        | 72        |
| 6         | Sc(OTf) <sub>3</sub>      | L9        | RT             | 15        | 85        | 62        |
| 7         | Y(OTf) <sub>3</sub>       | L4        | RT             | 15        | 37        | 87        |
| 8         | La(OTf) <sub>3</sub>      | L4        | RT             | 15        | 0         | --        |
| 9         | In(OTf) <sub>3</sub>      | L6        | RT             | 15        | 83        | 64        |
| 10        | Yb(OTf) <sub>3</sub>      | L6        | RT             | 15        | 63        | 82        |
| 11        | Zn(OTf) <sub>3</sub>      | L6        | RT             | 15        | 0         | --        |
| 12        | Ni(OTf) <sub>2</sub>      | L4        | 35             | 40        | 0         | --        |
| <b>13</b> | <b>Y(OTf)<sub>3</sub></b> | <b>L4</b> | <b>35</b>      | <b>40</b> | <b>56</b> | <b>91</b> |

The reactions were carried out using isatin 1a (0.1mmol) and vinyl azide 2a (0.12 mmol), DCM (0.5 ml), Catalyst (0.01 mmol, 10 mol%), Ligand (0.011 mmol, 11 mmol%), 4A MS (100 mg).

## 4. Procedure of synthetic applications

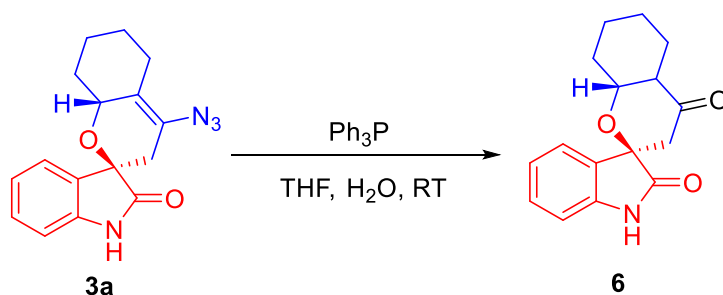

To the mixture of **3a** (59.2 mg, 0.2 mmol, 1 eq) and H<sub>2</sub>O (18.0 mg, 1 mmol, 5 eq) in 2 mL of THF, PPh<sub>3</sub> (131 mg, 0.5 mmol, 2.5 eq) was added at room temperature. After 12 hours of stirring (complete consumption of starting material, indicated by TLC analysis) the reaction mixture was filtration, concentrated under reduced pressure. Crude was purified by column chromatography (silica gel, Petroleum ether/ EtOAc: 5/1) to obtain the desired product **6** (43.9 mg, 81% yield, DR: 9:1) as a white solid.

### Diastereomer Ratio calculation

The Diastereomer Ratio was measured by <sup>1</sup>H NMR analysis and HPLC analysis.  
<sup>1</sup>H NMR analysis: DR = 9:1.

HPLC analysis: Peak 1 and Peak 4 are a pair of enantiomers, Peak 2 and Peak 3 are a pair of enantiomers. In the spectrum of chiral product, The area ratio between peak 4 and peak 3 =  $15650818 \div 1631873 \approx 9:1$ .

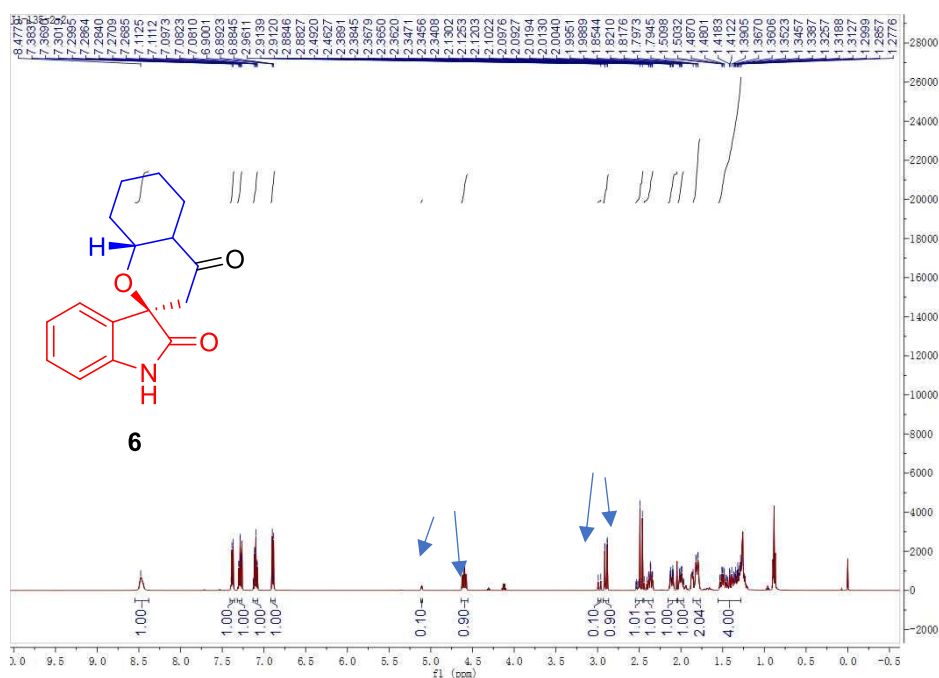

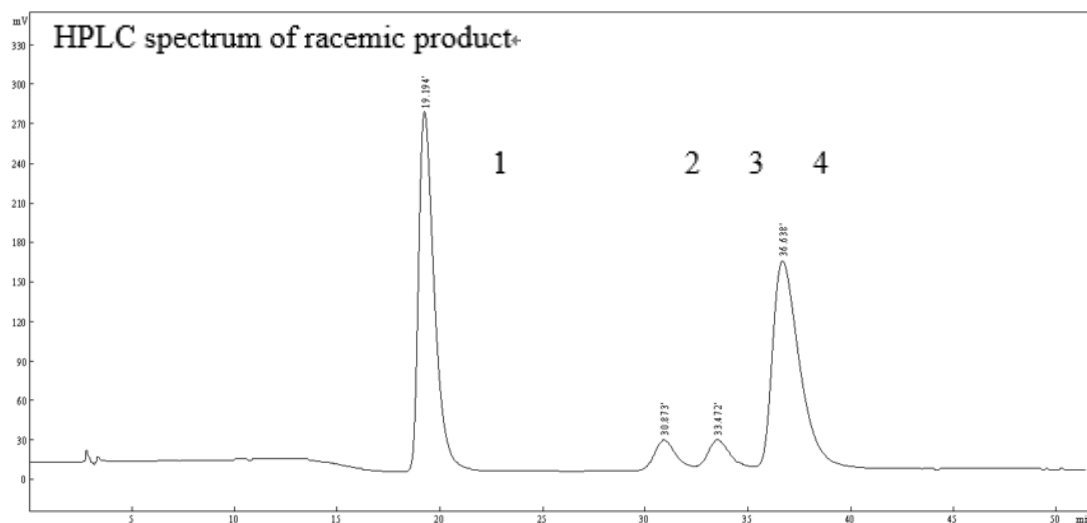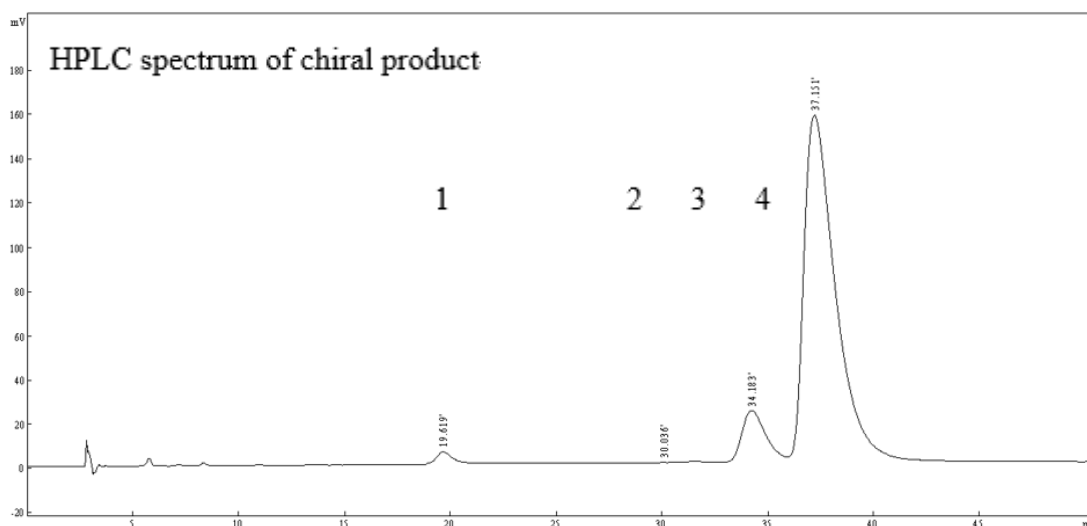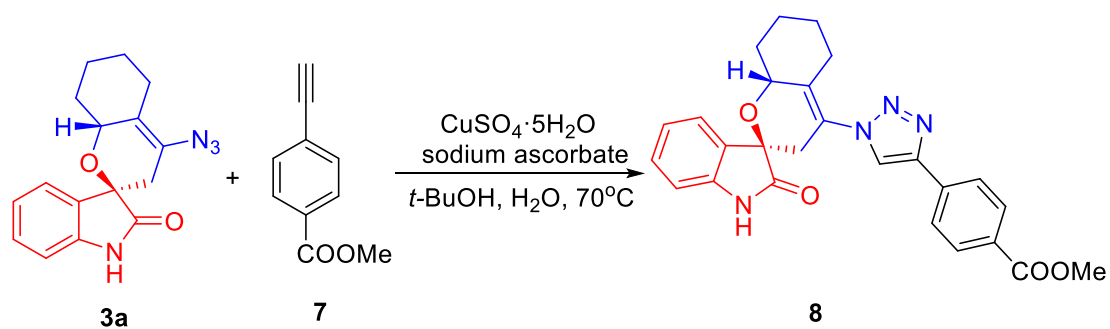

To the mixture of **3a** (59.2 mg, 0.2 mmol, 1 eq),  $\text{CuSO}_4 \cdot 5\text{H}_2\text{O}$  (9.9 mg, 0.04 mmol, 0.2 eq), and Sodium ascorbate (15.8 mg, 0.08 mmol, 0.4 eq) in 2 mL (*t*-BuOH+H<sub>2</sub>O, 1:1) alkyne (38.4 mg, 0.24 mmol, 1.2 eq) was added at room temperature. Then, the

reaction mixture was stirred at 70 °C for 12 hours. After cool down to the room temperature, it was concentrated, diluted with 5 mL of water and extracted with ethyl acetate (3X10 mL). The combined organic layers were dried on Na<sub>2</sub>SO<sub>4</sub>, concentrated under reduced pressure, purified by column chromatography (silica gel, Petroleum ether/ EtOAc: 2/1) to get the desired product **8** (65.8 mg, 72% yield) as a light yellow solid.

## 5. X-ray Crystallography Data

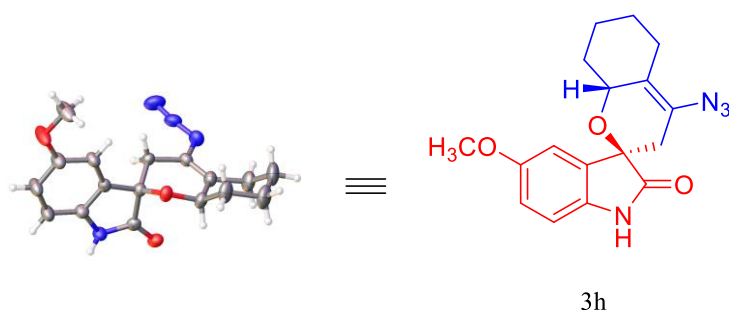

CCDC 2016806 (**3h**) contain the supplementary crystallographic data for this paper. These data can be obtained free of charge from The Cambridge Crystallographic Data Centre via [www.ccdc.cam.ac.uk/data\\_request/ci](http://www.ccdc.cam.ac.uk/data_request/ci)

## 6. Characterization Data

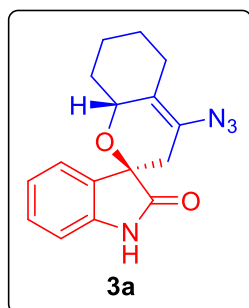

Yellow solid. 95% yield. <sup>1</sup>H NMR (500 MHz, CDCl<sub>3</sub>) δ 8.17 (s, 1H), 7.35 (d, *J* = 7.4 Hz, 1H), 7.28 (td, *J* = 7.7, 1.2 Hz, 1H), 7.09 (td, *J* = 7.6, 0.9 Hz, 1H), 6.86 (d, *J* = 7.7 Hz, 1H), 4.72 – 4.60 (m, 1H), 2.98 – 2.91 (m, 1H), 2.88 (dt, *J* = 16.7, 2.8 Hz, 1H), 2.39 (dt, *J* = 16.7, 2.2 Hz, 1H), 2.12 – 2.03 (m, 1H), 1.84 – 1.73 (m, 3H), 1.47 – 1.27 (m, 3H). <sup>13</sup>C NMR (126 MHz, CDCl<sub>3</sub>) δ 176.35, 140.34, 130.22, 130.14, 125.78, 124.48, 123.29, 118.28, 110.10, 74.32, 72.54, 34.08, 30.27, 26.03, 25.70, 24.13. HRMS (ESI, *m/z*) calcd for C<sub>16</sub>H<sub>16</sub>N<sub>4</sub>O<sub>2</sub> [M-N<sub>2</sub>+H]<sup>+</sup> 269.12831, found 269.12845. [α]<sub>D</sub><sup>24</sup> = -127.1° (c 0.66, CHCl<sub>3</sub>); >99% ee; Chiral HPLC analysis of the product: Phenomenex 00G-4457-E0 250X4.6 mm 5u column; hexane/2-propanol = 90/10, detected at 254 nm, Flow rate = 1 mL/min, Retention times: 6.8 min (minor), 12.8 min (major).

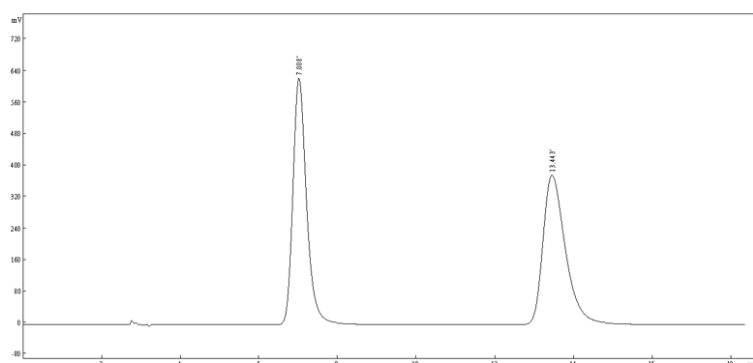

| Peak# | Ret. Time | Area     | Area% |
|-------|-----------|----------|-------|
| 1     | 7.008     | 15094874 | 50.03 |
| 2     | 13.443    | 15076251 | 49.97 |
| Total |           | 30171125 | 100   |

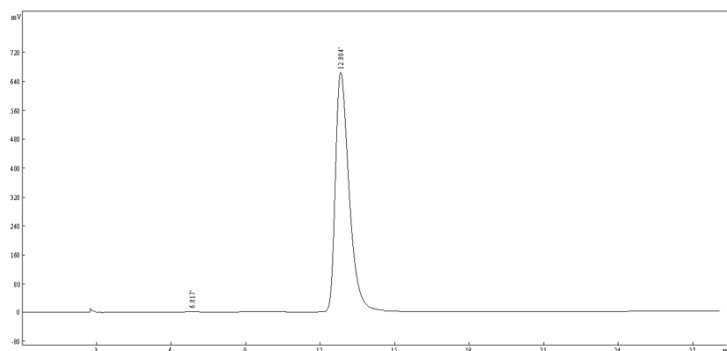

| Peak# | Ret. Time | Area | Area% |
|-------|-----------|------|-------|
|-------|-----------|------|-------|



|       |        |          |       |
|-------|--------|----------|-------|
| 1     | 6.817  | 48072    | 0.189 |
| 2     | 12.804 | 25386542 | 99.81 |
| Total |        | 25434616 | 100   |

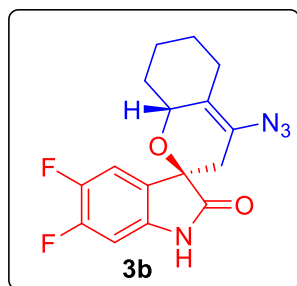

Brown solid. 95% yield.  $^1\text{H}$  NMR (500 MHz,  $\text{CDCl}_3$ )  $\delta$  8.34 (s, 1H), 7.12 (dd,  $J = 8.9, 7.7$  Hz, 1H), 6.66 (dd,  $J = 9.6, 6.3$  Hz, 1H), 4.60 – 4.49 (m, 1H), 2.91 – 2.83 (m, 1H), 2.74 (dt,  $J = 16.7, 2.8$  Hz, 1H), 2.31 (dt,  $J = 16.7, 2.1$  Hz, 1H), 2.01 – 1.98 (m, 1H), 1.79 – 1.67 (m, 3H), 1.41 – 1.20 (m, 3H).  $^{13}\text{C}$  NMR (126 MHz,  $\text{CDCl}_3$ )  $\delta$  176.35, 151.51 (dd,  $J = 250.8, 14.0$  Hz), 147.08 (dd,  $J = 245.1, 13.6$  Hz), 136.61 (d,  $J = 10.1$  Hz), 125.78, 125.55, 117.89, 114.38 (d,  $J = 20.4$  Hz), 100.43 (d,  $J = 23.0$  Hz), 74.26, 72.70, 34.04, 30.20, 25.96, 25.67, 24.07. HRMS (ESI,  $m/z$ ) calcd for  $\text{C}_{16}\text{H}_{14}\text{F}_2\text{N}_4\text{O}_2$  [ $\text{M}-\text{N}_2+\text{H}$ ] $^+$  305.10961, found 305.10907.  $[\alpha]_D^{25} = -77.2^\circ$  (c 0.94,  $\text{CHCl}_3$ ); 97% ee; Chiral HPLC analysis of the product: Daicel Chiralpak AD-H 250X4.6 mm 5u column; hexane/2-propanol = 95/5, detected at 254 nm, Flow rate = 1 mL/min, Retention times: 9.4 min (minor), 12.2 min (major).

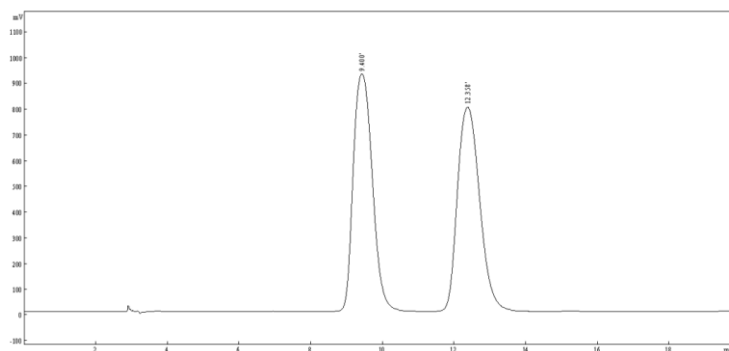

| Peak# | Ret. Time | Area     | Area% |
|-------|-----------|----------|-------|
| 1     | 9.400     | 34087715 | 49.89 |
| 2     | 12.358    | 34120032 | 50.02 |
| Total |           | 68207747 | 100   |

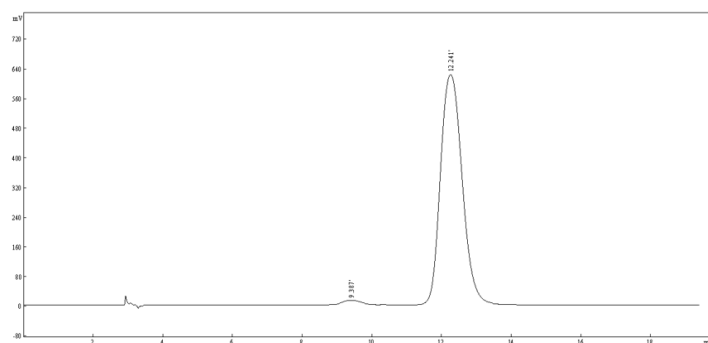

| Peak# | Ret. Time | Area     | Area% |
|-------|-----------|----------|-------|
| 1     | 9.387     | 425783   | 1.566 |
| 2     | 12.241    | 26763712 | 98.44 |
| Total |           | 27189495 | 100   |

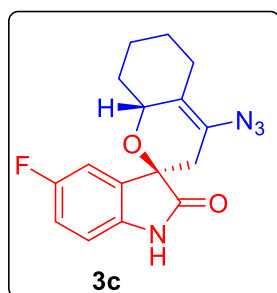

Brown solid. 98% yield.  $^1\text{H}$  NMR (500 MHz,  $\text{CDCl}_3$ )  $\delta$  8.36 (s, 1H), 7.02 (dd,  $J = 7.6$ , 2.6 Hz, 1H), 6.91 (td,  $J = 8.8$ , 2.6 Hz, 1H), 6.74 (dd,  $J = 8.5$ , 4.1 Hz, 1H), 4.64 – 4.46 (m, 1H), 2.95 – 2.81 (m, 1H), 2.76 (dt,  $J = 16.7$ , 2.8 Hz, 1H), 2.33 (dt,  $J = 16.7$ , 2.2 Hz, 1H), 2.05 – 1.95 (m, 1H), 1.81 – 1.66 (m, 3H), 1.40 – 1.20 (m, 3H).  $^{13}\text{C}$  NMR (126 MHz,  $\text{CDCl}_3$ )  $\delta$  176.53, 159.44 (d,  $J = 242.6$  Hz), 136.24 (d,  $J = 2.2$  Hz), 131.60 (d,  $J = 7.7$  Hz), 125.78, 118.05, 116.59 (d,  $J = 23.6$  Hz), 112.55 (d,  $J = 24.9$  Hz), 110.94 (d,  $J = 7.8$  Hz), 74.64, 72.66, 34.05, 30.23, 25.99, 25.69, 24.10. HRMS (ESI,  $m/z$ ) calcd for  $\text{C}_{16}\text{H}_{15}\text{FN}_4\text{O}_2$   $[\text{M}-\text{N}_2+\text{H}]^+$  287.11903, found 287.11866.  $[\alpha]_D^{25} = -91.6^\circ$  (c 1.97,  $\text{CHCl}_3$ ); 97% ee; Chiral HPLC analysis of the product: Phenomenex 00G-4457-E0 250X4.6 mm 5u column; hexane/2-propanol = 95/5, detected at 254 nm, Flow rate = 1 mL/min, Retention times: 9.8 min (minor), 15.0 min (major).

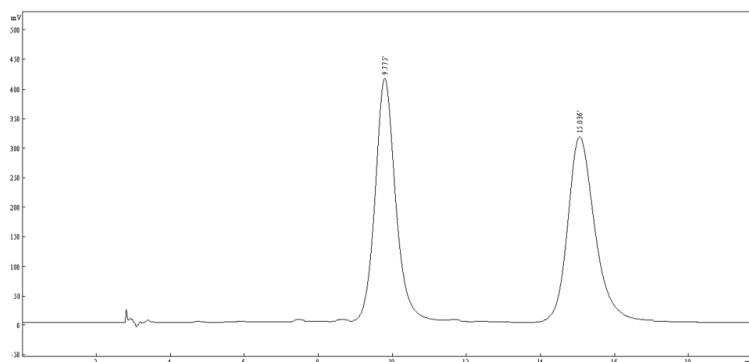

| Peak# | Ret. Time | Area | Area% |
|-------|-----------|------|-------|
| 1     | 9.777     |      |       |
| 2     | 15.006    |      |       |

|       |        |          |       |
|-------|--------|----------|-------|
| 1     | 9.775  | 15637912 | 49.24 |
| 2     | 15.036 | 16120166 | 50.76 |
| Total |        | 31758078 | 100   |

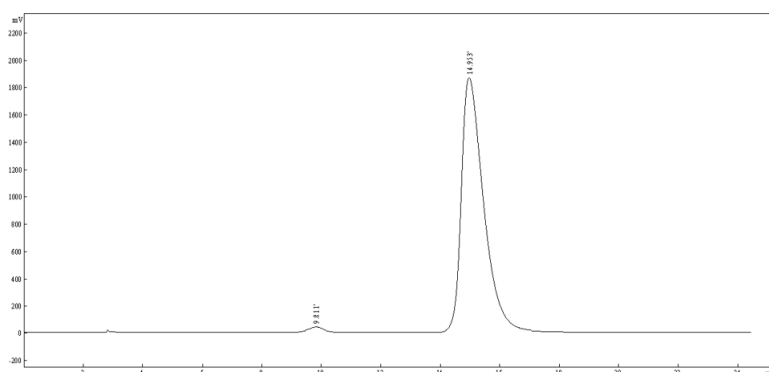

| Peak# | Ret. Time | Area     | Area% |
|-------|-----------|----------|-------|
| 1     | 9.811     | 1458863  | 1.472 |
| 2     | 14.953    | 97640243 | 98.53 |
| Total |           | 99099106 | 100   |

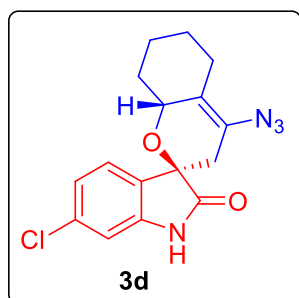

Brown solid. 92% yield.  $^1\text{H}$  NMR (500 MHz,  $\text{CDCl}_3$ )  $\delta$  8.36 (s, 1H), 7.19 (d,  $J = 2.3$  Hz, 1H), 7.00 (dd,  $J = 8.0, 1.8$  Hz, 1H), 6.81 (d,  $J = 1.7$  Hz, 1H), 4.61 – 4.49 (m, 1H), 2.91 – 2.83 (m, 1H), 2.77 (dt,  $J = 16.7, 2.8$  Hz, 1H), 2.31 (dt,  $J = 16.7, 2.1$  Hz, 1H), 2.05 – 1.94 (m, 1H), 1.80 – 1.65 (m, 3H), 1.41 – 1.21 (m, 3H).  $^{13}\text{C}$  NMR (126 MHz,  $\text{CDCl}_3$ )  $\delta$  176.34, 141.52, 135.98, 128.52, 125.80, 125.54, 123.28, 118.05, 110.80, 74.02, 72.64, 34.07, 30.13, 26.00, 25.70, 24.09. HRMS (ESI,  $m/z$ ) calcd for  $\text{C}_{16}\text{H}_{15}\text{ClN}_4\text{O}_2$   $[\text{M}-\text{N}_2+\text{H}]^+$  303.08948, found 303.08860.  $[\alpha]_D^{25} = -76.3^\circ$  (c 0.82,  $\text{CHCl}_3$ ); 95% ee; Chiral HPLC analysis of the product: Daicel Chiralpak AD-H 250X4.6 mm 5u column; hexane/2-propanol = 95/5, detected at 254 nm, Flow rate = 1 mL/min, Retention times: 10.7 min (minor), 17.4 min (major).

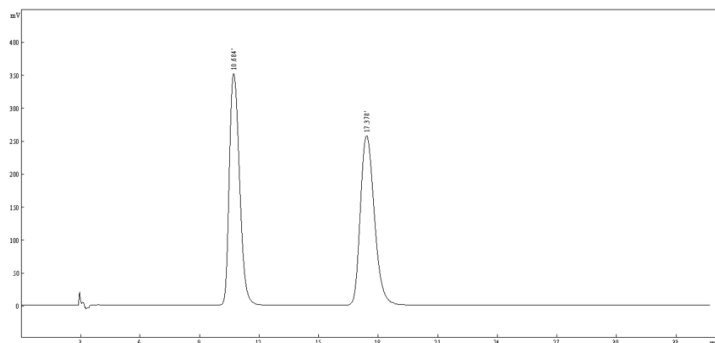

| Peak# | Ret. Time | Area     | Area% |
|-------|-----------|----------|-------|
| 1     | 10.684    | 12518318 | 49.92 |
| 2     | 17.378    | 12558218 | 50.08 |
| Total |           | 25076536 | 100   |

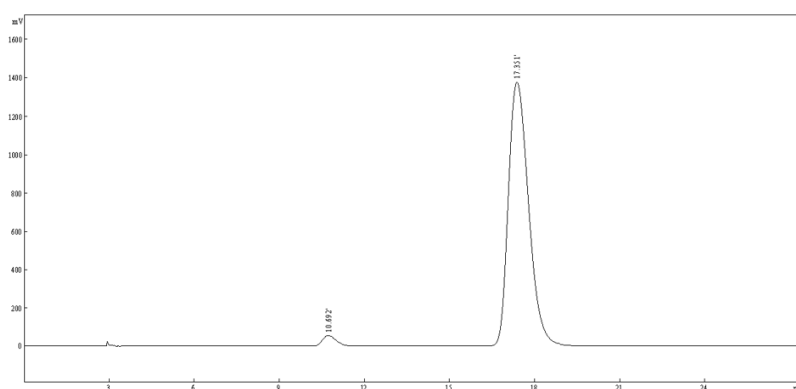

| Peak# | Ret. Time | Area     | Area% |
|-------|-----------|----------|-------|
| 1     | 10.692    | 1850228  | 2.65  |
| 2     | 17.351    | 67919072 | 97.35 |
| Total |           | 69769300 | 100   |

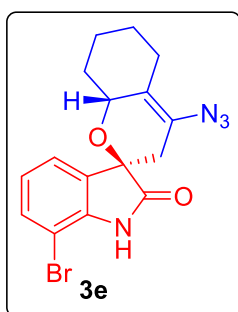

Brown solid. 99% yield.  $^1\text{H}$  NMR (500 MHz,  $\text{CDCl}_3$ )  $\delta$  7.78 (s, 1H), 7.34 (dd,  $J = 8.2, 0.9$  Hz, 1H), 7.22 (d,  $J = 7.4$  Hz, 1H), 6.92 (dd,  $J = 8.1, 7.6$  Hz, 1H), 4.63 – 4.52 (m, 1H), 2.90 – 2.82 (m, 1H), 2.78 (dt,  $J = 16.7, 2.8$  Hz, 1H), 2.35 (dt,  $J = 16.7, 2.2$  Hz, 1H), 2.04 – 1.94 (m, 1H), 1.80 – 1.62 (m, 3H), 1.40 – 1.20 (m, 3H).  $^{13}\text{C}$  NMR (126 MHz,  $\text{CDCl}_3$ )  $\delta$  174.76, 139.81, 132.82, 131.35, 125.84, 124.52, 123.34, 117.91, 103.06, 75.46, 72.66, 34.03, 30.26, 26.00, 25.68, 24.11. HRMS (ESI,  $m/z$ ) calcd for  $\text{C}_{16}\text{H}_{15}\text{BrN}_4\text{O}_2$  [ $\text{M}-\text{N}_2+\text{H}$ ] $^+$  347.03897, found 347.03795.  $[\alpha]^{25}_{\text{D}} = -60.7^\circ$  (c 1.05,  $\text{CHCl}_3$ ); 97% ee; Chiral HPLC analysis of the product: Phenomenex 00G-4457-E0

250X4.6 mm 5u column; hexane/2-propanol = 98/2, detected at 254 nm, Flow rate = 1 mL/min, Retention times: 14.8 min (minor), 32.2 min (major).

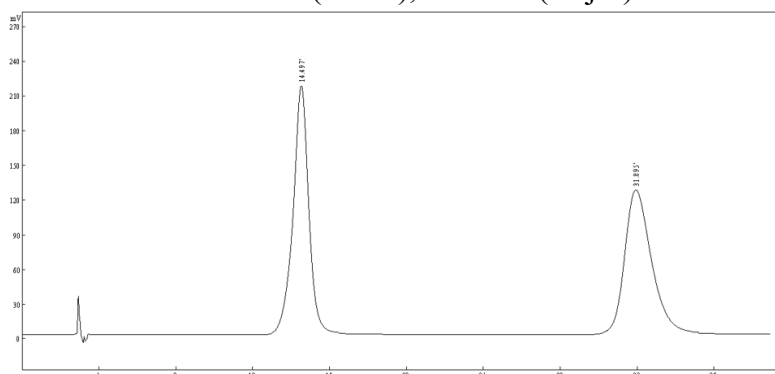

| Peak# | Ret. Time | Area     | Area% |
|-------|-----------|----------|-------|
| 1     | 14.497    | 12162285 | 49.97 |
| 2     | 31.895    | 12175814 | 50.03 |
| Total |           | 24338099 | 100   |

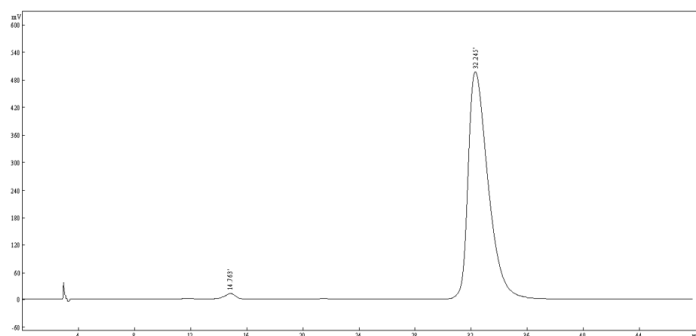

| Peak# | Ret. Time | Area     | Area% |
|-------|-----------|----------|-------|
| 1     | 14.763    | 625388   | 1.261 |
| 2     | 32.245    | 48976224 | 98.74 |
| Total |           | 49601612 | 100   |

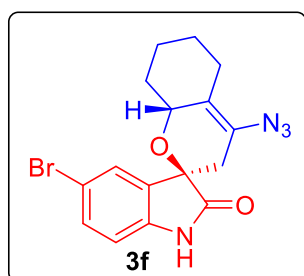

Brown solid. 95% yield.  $^1\text{H}$  NMR (500 MHz,  $\text{CDCl}_3$ )  $\delta$  8.32 (s, 1H), 7.40 (d,  $J = 1.9$  Hz, 1H), 7.33 (dd,  $J = 8.3, 2.0$  Hz, 1H), 6.69 (d,  $J = 8.3$  Hz, 1H), 4.56 (dd,  $J = 7.0, 4.0$  Hz, 1H), 2.91 – 2.83 (m, 1H), 2.78 (dt,  $J = 16.7, 2.8$  Hz, 1H), 2.31 (dt,  $J = 16.7, 2.1$  Hz, 1H), 2.02 – 1.98 (m, 1H), 1.81 – 1.64 (m, 3H), 1.40 – 1.20 (m, 3H).  $^{13}\text{C}$  NMR (126 MHz,  $\text{CDCl}_3$ )  $\delta$  175.99, 139.35, 133.03, 132.05, 127.88, 125.75, 118.01, 115.85, 111.70, 74.39, 72.67, 34.06, 30.20, 25.99, 25.70, 24.10. HRMS (ESI,  $m/z$ ) calcd for  $\text{C}_{16}\text{H}_{15}\text{BrN}_4\text{O}_2$  [ $\text{M}-\text{N}_2+\text{H}$ ] $^+$  347.03897, found 347.03767.  $[\alpha]_D^{25} = -115.6^\circ$  (c 1.05,  $\text{CHCl}_3$ ); 97% ee; Chiral HPLC analysis of the product: Phenomenex 00G-4457-E0

250X4.6 mm 5u column; hexane/2-propanol = 95/5, detected at 254 nm, Flow rate = 1 mL/min, Retention times: 9.9 min (minor), 14.7 min (major).

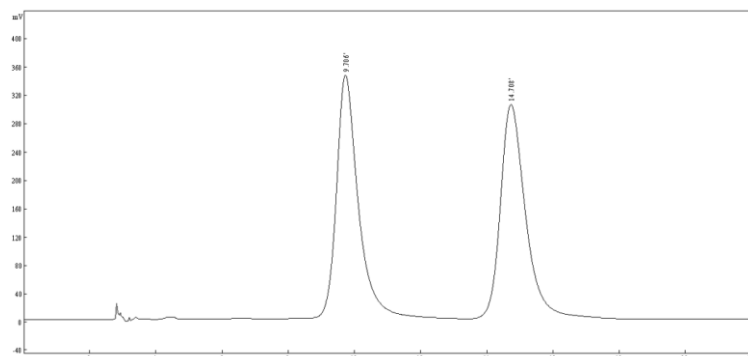

| Peak# | Ret. Time | Area     | Area% |
|-------|-----------|----------|-------|
| 1     | 9.706     | 15775277 | 49.69 |
| 2     | 14.708    | 15974010 | 50.31 |
| Total |           | 31749287 | 100   |

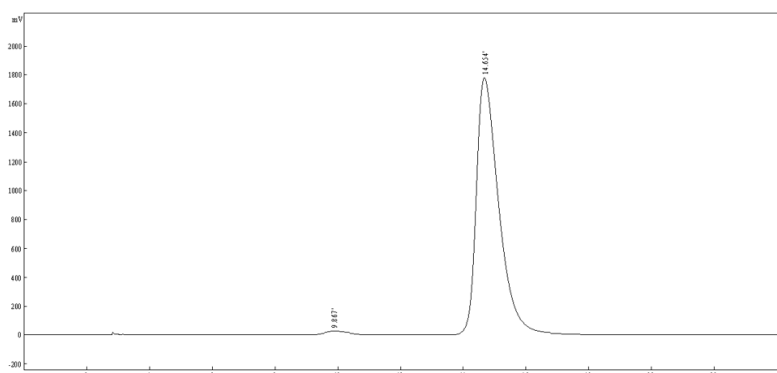

| Peak# | Ret. Time | Area     | Area% |
|-------|-----------|----------|-------|
| 1     | 9.867     | 1283076  | 1.429 |
| 2     | 14.654    | 88526726 | 98.57 |
| Total |           | 89809802 | 100   |

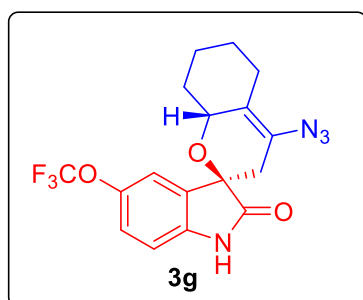

Brown solid. 99% yield.  $^1\text{H}$  NMR (500 MHz,  $\text{CDCl}_3$ )  $\delta$  8.38 (s, 1H), 7.17 (d,  $J = 1.5$  Hz, 1H), 7.09 (dd,  $J = 8.4, 1.6$  Hz, 1H), 6.80 (d,  $J = 8.5$  Hz, 1H), 4.59 – 4.54 (m, 1H), 2.90 – 2.85 (m, 1H), 2.77 (dt,  $J = 16.7, 2.8$  Hz, 1H), 2.34 (dt,  $J = 16.7, 2.2$  Hz, 1H), 2.03 – 1.97 (m, 1H), 1.81 – 1.64 (m, 3H), 1.41 – 1.23 (m, 3H).  $^{13}\text{C}$  NMR (126 MHz,  $\text{CDCl}_3$ )  $\delta$  176.44, 145.14, 138.99, 131.58, 125.80, 123.33, 120.51 (q,  $J = 257.5$  Hz), 118.47, 117.96, 110.84, 74.50, 72.73, 34.04, 30.24, 25.98, 25.71, 24.09. HRMS (ESI,

$m/z$ ) calcd for  $C_{17}H_{15}F_3N_4O_3$   $[M-N_2+H]^+$  353.11075, found 353.11040.  $[\alpha]_D^{25} = -70.5^\circ$  (c 1.09,  $CHCl_3$ ); 97% ee; Chiral HPLC analysis of the product: Daicel Chiralpak OJ-H 250X4.6 mm 5u column; hexane/2-propanol = 95/5, detected at 254 nm, Flow rate = 1 mL/min, Retention times: 5.8 min (major), 8.7 min (minor).

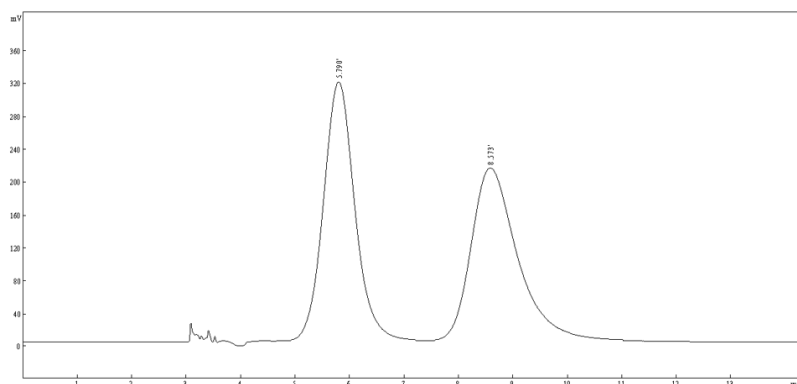

| Peak# | Ret. Time | Area     | Area% |
|-------|-----------|----------|-------|
| 1     | 5.791     | 12593398 | 50.18 |
| 2     | 8.573     | 12501442 | 59.82 |
| Total |           | 25094840 | 100   |

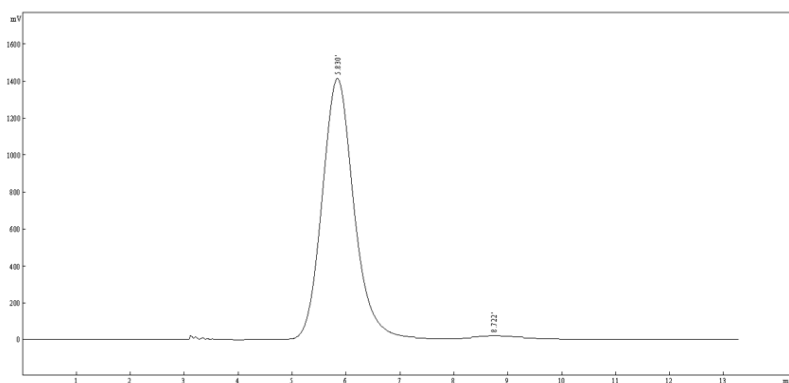

| Peak# | Ret. Time | Area     | Area% |
|-------|-----------|----------|-------|
| 1     | 5.830     | 57366746 | 98.38 |
| 2     | 8.722     | 941637   | 1.615 |
| Total |           | 58308383 | 100   |

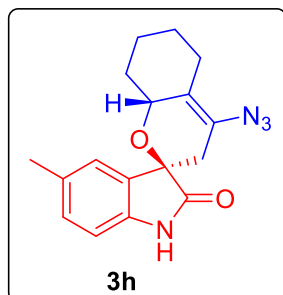

Brown solid. 96% yield.  $^1H$  NMR (500 MHz,  $CDCl_3$ )  $\delta$  7.79 (s, 1H), 7.17 (s, 1H), 7.07 (dd,  $J = 7.9, 0.8$  Hz, 1H), 6.74 (d,  $J = 7.9$  Hz, 1H), 4.70 – 4.61 (m, 1H), 2.95 – 2.90 (m,

1H), 2.87 (dt,  $J = 16.7, 2.8$  Hz, 1H), 2.37 (dt,  $J = 16.7, 2.2$  Hz, 1H), 2.33 (s, 3H), 2.10 – 2.07 (m, 1H), 1.87 – 1.71 (m, 3H), 1.50 – 1.28 (m, 3H).  $^{13}\text{C}$  NMR (126 MHz,  $\text{CDCl}_3$ )  $\delta$  176.52, 137.87, 132.90, 130.49, 130.10, 125.75, 125.12, 118.36, 109.90, 74.46, 72.50, 34.11, 30.32, 26.04, 25.69, 24.14, 21.10. HRMS (ESI,  $m/z$ ) calcd for  $\text{C}_{17}\text{H}_{18}\text{N}_4\text{O}_2$   $[\text{M}-\text{N}_2+\text{H}]^+$  283.14410, found 283.14325.  $[\alpha]_D^{25} = -38.3^\circ$  (c 2.1,  $\text{CHCl}_3$ ); 98% ee; Chiral HPLC analysis of the product: Phenomenex 00G-4457-E0 250X4.6 mm 5u column; hexane/2-propanol = 90/10, detected at 254 nm, Flow rate = 1 mL/min, Retention times: 7.1 min (minor), 13.8 min (major).

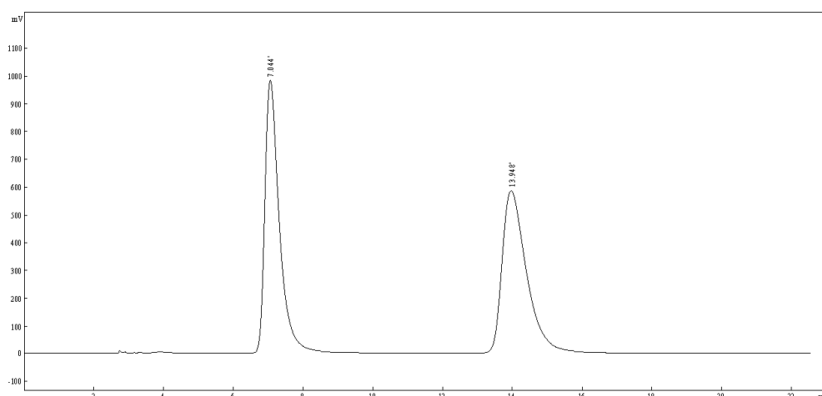

| Peak# | Ret. Time | Area     | Area% |
|-------|-----------|----------|-------|
| 1     | 7.044     | 28252115 | 49.83 |
| 2     | 13.948    | 28440138 | 50.17 |
| Total |           | 56692253 | 100   |

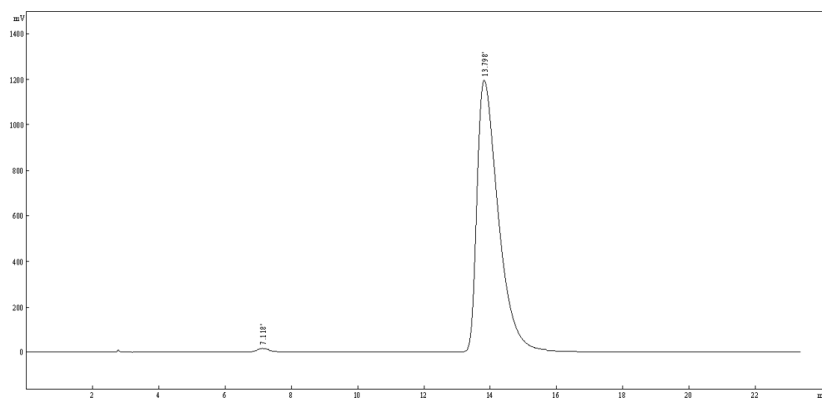

| Peak# | Ret. Time | Area     | Area%  |
|-------|-----------|----------|--------|
| 1     | 7.118     | 437669   | 0.8124 |
| 2     | 13.798    | 53437635 | 99.19  |
| Total |           | 53875304 | 100    |



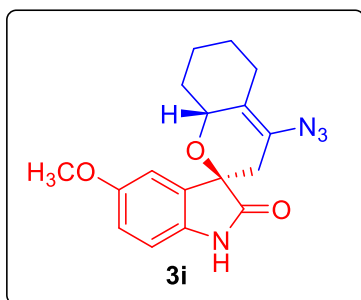

Brown solid. 95% yield.  $^1\text{H}$  NMR (500 MHz,  $\text{CDCl}_3$ )  $\delta$  8.15 – 7.96 (m, 1H), 6.87 (d,  $J$  = 2.4 Hz, 1H), 6.74 (dd,  $J$  = 8.5, 2.5 Hz, 1H), 6.70 (d,  $J$  = 8.5 Hz, 1H), 4.62 – 4.57 (m, 1H), 3.73 (s, 3H), 2.88 – 2.83 (m, 1H), 2.78 (dt,  $J$  = 16.7, 2.7 Hz, 1H), 2.32 (dt,  $J$  = 16.6, 2.1 Hz, 1H), 2.04 – 1.98 (m, 1H), 1.78 – 1.67 (m, 3H), 1.37 – 1.22 (m, 3H).  $^{13}\text{C}$  NMR (126 MHz,  $\text{CDCl}_3$ )  $\delta$  176.48, 156.40, 133.55, 131.23, 125.77, 118.29, 115.18, 111.12, 110.71, 74.75, 72.57, 55.87, 34.07, 30.41, 26.03, 25.69, 24.13. HRMS (ESI,  $m/z$ ) calcd for  $\text{C}_{17}\text{H}_{18}\text{N}_4\text{O}_3$   $[\text{M}-\text{N}_2+\text{H}]^+$  299.13902, found 299.13900.  $[\alpha]_D^{25} = -129.0^\circ$  (c 1.25,  $\text{CHCl}_3$ ); 98% ee; Chiral HPLC analysis of the product: Phenomenex 00G-4457-E0 250X4.6 mm 5u column; hexane/2-propanol = 90/10, detected at 254 nm, Flow rate = 1 mL/min, Retention times: 10.3 min (minor), 26.2 min (major).

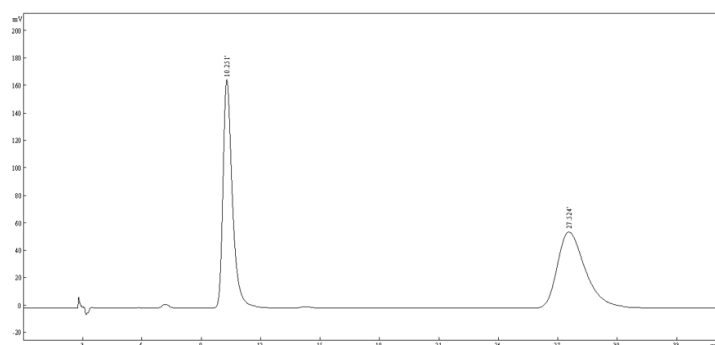

| Peak# | Ret. Time | Area     | Area% |
|-------|-----------|----------|-------|
| 1     | 10.251    | 4599696  | 50.11 |
| 2     | 27.524    | 4575933  | 49.89 |
| Total |           | 10975629 | 100   |

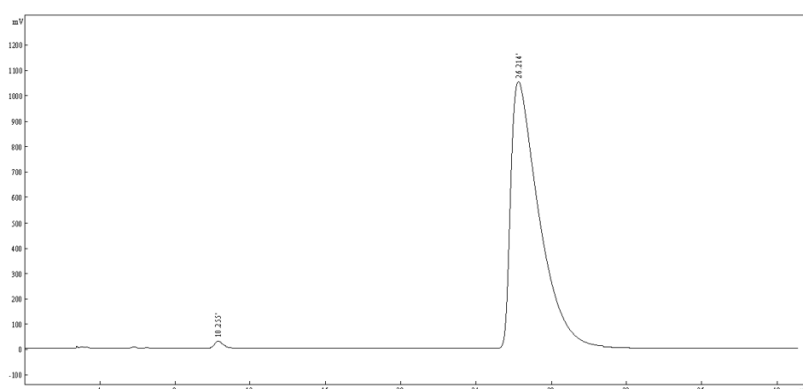

| Peak# | Ret. Time | Area      | Area%  |
|-------|-----------|-----------|--------|
| 1     | 10.255    | 943852    | 0.8507 |
| 2     | 26.214    | 110001293 | 99.15  |

|       |  |           |     |
|-------|--|-----------|-----|
| Total |  | 110945145 | 100 |
|-------|--|-----------|-----|

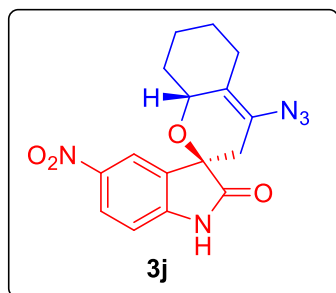

Brown solid. 98% yield.  $^1\text{H}$  NMR (500 MHz,  $\text{CDCl}_3$ )  $\delta$  8.28 (td,  $J = 4.6, 2.3$  Hz, 2H), 8.24 (s, 1H), 7.02 – 6.98 (m, 1H), 4.66 – 4.59 (m, 1H), 2.98 – 2.91 (m, 2H), 2.42 (dt,  $J = 16.6, 2.1$  Hz, 1H), 2.10 – 2.05 (m, 1H), 1.86 – 1.75 (m, 3H), 1.47 – 1.29 (m, 3H).  $^{13}\text{C}$  NMR (126 MHz,  $\text{CDCl}_3$ )  $\delta$  175.77, 146.03, 143.99, 130.99, 127.13, 125.85, 120.90 (s), 117.63, 109.92, 73.90, 72.90, 34.03, 30.02, 25.95, 25.71, 24.06. HRMS (ESI,  $m/z$ ) calcd for  $\text{C}_{16}\text{H}_{15}\text{N}_5\text{O}_4$   $[\text{M}-\text{N}_2+\text{H}]^+$  314.11353, found 314.11321.  $[\alpha]_D^{25} = -64.1^\circ$  (c 0.52,  $\text{CHCl}_3$ ); 96% ee; Chiral HPLC analysis of the product: Daicel Chiralpak AD-H 250X4.6 mm 5u column; hexane/2-propanol = 90/10, detected at 254 nm, Flow rate = 1 mL/min, Retention times: 9.5 min (minor), 10.7 min (major).

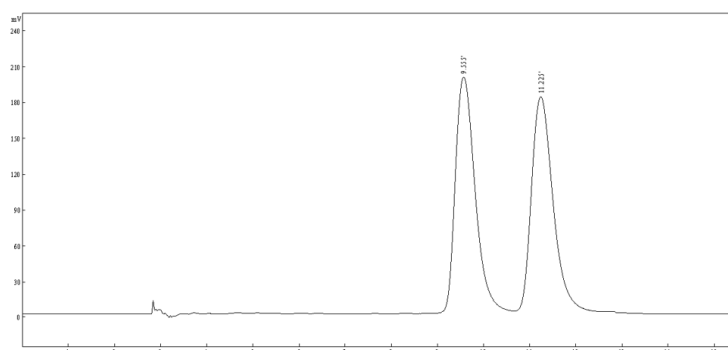

| Peak# | Ret. Time | Area     | Area% |
|-------|-----------|----------|-------|
| 1     | 9.555     | 5827759  | 50    |
| 2     | 11.225    | 5827820  | 50    |
| Total |           | 11655579 | 100   |

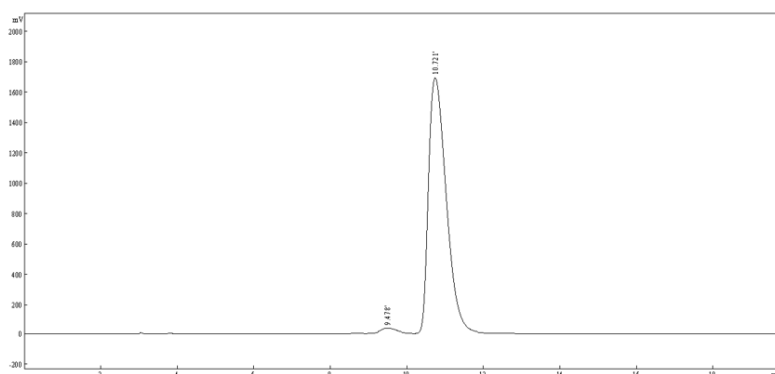

| Peak# | Ret. Time | Area    | Area% |
|-------|-----------|---------|-------|
| 1     | 9.478     | 1020133 | 1.874 |

|       |        |          |       |
|-------|--------|----------|-------|
| 2     | 10.721 | 54215590 | 98.16 |
| Total |        | 55235723 | 100   |

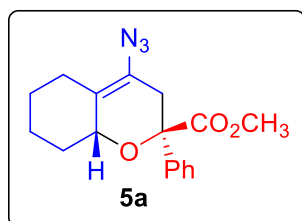

Yellow solid. 97% yield.  $^1\text{H}$  NMR (500 MHz,  $\text{CDCl}_3$ )  $\delta$  7.50 (dd,  $J = 5.2, 3.4$  Hz, 2H), 7.32 – 7.27 (m, 2H), 7.26 – 7.21 (m, 1H), 4.30 – 4.19 (m, 1H), 3.64 (s, 3H), 3.27 (dt,  $J = 15.7, 2.0$  Hz, 1H), 2.80 – 2.71 (m, 1H), 2.48 (dt,  $J = 15.7, 3.0$  Hz, 1H), 2.25 – 2.22 (m, 1H), 1.79 – 1.72 (m, 1H), 1.69 – 1.64 (m, 1H), 1.49 (d,  $J = 16.8$  Hz, 1H), 1.38 – 1.26 (m, 2H), 1.12 – 1.06 (m, 1H).  $^{13}\text{C}$  NMR (126 MHz,  $\text{CDCl}_3$ )  $\delta$  172.01, 140.59, 128.56, 128.22, 125.14, 124.58, 121.07, 79.40, 73.51, 52.81, 34.71, 33.40, 26.33, 25.88, 24.14. HRMS (ESI,  $m/z$ ) calcd for  $\text{C}_{17}\text{H}_{19}\text{N}_3\text{O}_3$   $[\text{M}-\text{N}_2+\text{H}]^+$  286.14377, found 286.14321.  $[\alpha]_D^{25} = 265.4^\circ$  (c 0.7,  $\text{CHCl}_3$ ); 99% ee; Chiral HPLC analysis of the product: Daicel Chiralpak OJ-H 250X4.6 mm 5u column; hexane/2-propanol = 98/2, detected at 254 nm, Flow rate = 1 mL/min, Retention times: 6.3 min (minor), 10.7 min (major).

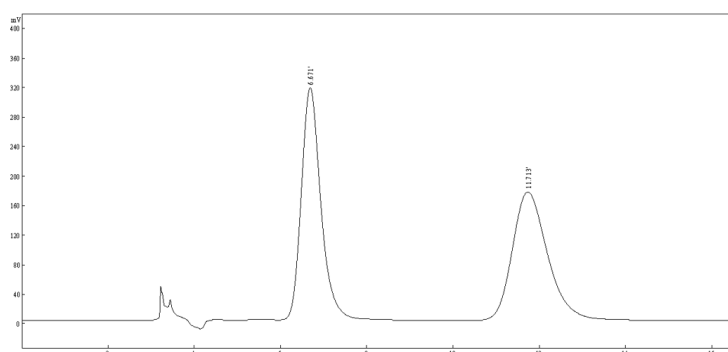

| Peak# | Ret. Time | Area     | Area% |
|-------|-----------|----------|-------|
| 1     | 6.671     | 9942223  | 50.1  |
| 2     | 11.713    | 9901781  | 49.9  |
| Total |           | 19844004 | 100   |

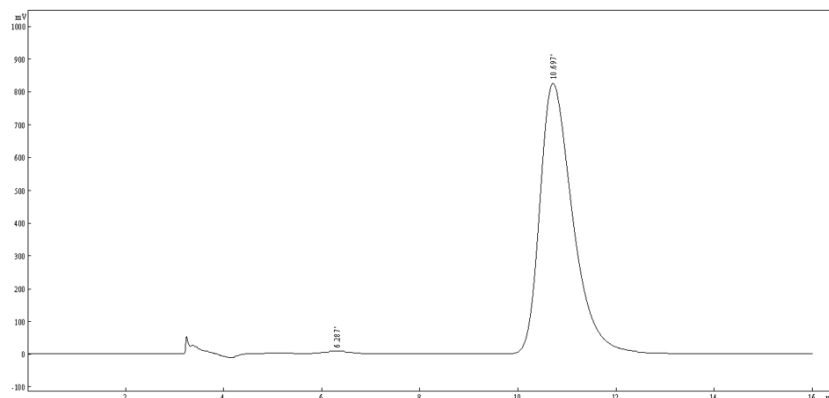

| Peak# | Ret. Time | Area   | Area%  |
|-------|-----------|--------|--------|
| 1     | 6.287     | 257328 | 0.6688 |

|       |        |          |       |
|-------|--------|----------|-------|
| 2     | 10.697 | 38218726 | 99.33 |
| Total |        | 38476054 | 100   |

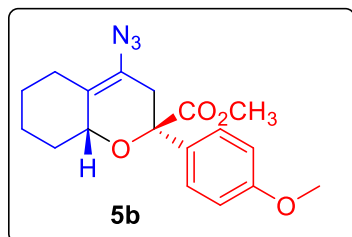

Yellow solid. 78% yield.  $^1\text{H}$  NMR (500 MHz,  $\text{CDCl}_3$ )  $\delta$  7.44 – 7.39 (m, 2H), 6.85 – 6.80 (m, 2H), 4.23 (dd,  $J = 5.7, 2.7$  Hz, 1H), 3.73 (s, 3H), 3.63 (s, 3H), 3.25 (dt,  $J = 15.6, 2.0$  Hz, 1H), 2.80 – 2.70 (m, 1H), 2.47 (dt,  $J = 15.6, 3.0$  Hz, 1H), 2.26 – 2.18 (m, 1H), 1.78 – 1.72 (m, 1H), 1.66 (d,  $J = 12.7$  Hz, 1H), 1.47 (td,  $J = 13.8, 1.9$  Hz, 1H), 1.36 – 1.25 (m, 2H), 1.11 – 1.05 (m, 1H).  $^{13}\text{C}$  NMR (126 MHz,  $\text{CDCl}_3$ )  $\delta$  172.18, 159.48, 132.77, 125.96, 125.18, 121.04, 113.89, 79.06, 73.52, 55.31, 52.73, 34.74, 33.29, 26.34, 25.88, 24.14. HRMS (ESI,  $m/z$ ) calcd for  $\text{C}_{18}\text{H}_{21}\text{N}_3\text{O}_4$   $[\text{M}-\text{N}_2+\text{H}]^+$  316.15433, found 316.15377.  $[\alpha]^{25}_{\text{D}} = 209.8^\circ$  (c 0.86,  $\text{CHCl}_3$ ); >99% ee; Chiral HPLC analysis of the product: Daicel Chiralpak OJ-H 250X4.6 mm 5u column; hexane/2-propanol = 97/3, detected at 254 nm, Flow rate = 1 mL/min, Retention times: 12.1 min (minor), 22.9 min (major).

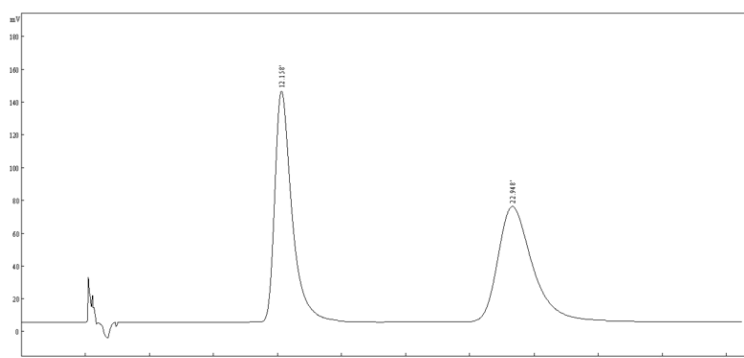

| Peak# | Ret. Time | Area     | Area% |
|-------|-----------|----------|-------|
| 1     | 12.158    | 7820976  | 49.99 |
| 2     | 22.948    | 7823703  | 50.01 |
| Total |           | 15644679 | 100   |

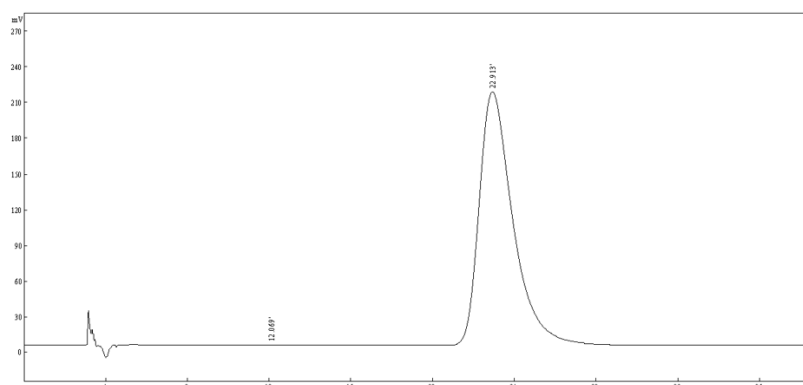

| Peak# | Ret. Time | Area | Area% |
|-------|-----------|------|-------|
|-------|-----------|------|-------|

|       |        |          |         |
|-------|--------|----------|---------|
| 1     | 12.069 | 3843     | 0.01581 |
| 2     | 22.913 | 24305094 | 99.99   |
| Total |        | 24308937 | 100     |

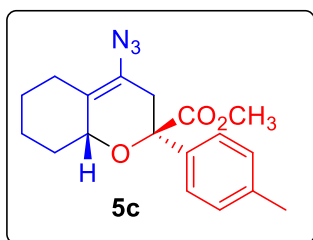

Yellow solid. 86% yield.  $^1\text{H}$  NMR (500 MHz,  $\text{CDCl}_3$ )  $\delta$  7.38 (d,  $J = 8.3$  Hz, 2H), 7.10 (d,  $J = 8.0$  Hz, 2H), 4.25 – 4.19 (m, 1H), 3.64 (s, 3H), 3.25 (dt,  $J = 15.7, 2.1$  Hz, 1H), 2.75 (ddt,  $J = 14.0, 4.1, 2.1$  Hz, 1H), 2.46 (dt,  $J = 15.7, 3.0$  Hz, 1H), 2.27 (s, 3H), 2.24 – 2.16 (m, 1H), 1.79 – 1.71 (m, 1H), 1.66 (dd,  $J = 7.6, 5.1$  Hz, 1H), 1.39 – 1.22 (m, 3H), 1.12 – 1.05 (m, 1H).  $^{13}\text{C}$  NMR (126 MHz,  $\text{CDCl}_3$ )  $\delta$  171.1, 136.96, 136.68, 128.19, 124.11, 123.47, 120.05, 78.27, 72.47, 51.73, 33.69, 32.33, 25.31, 24.84, 23.11, 20.06. HRMS (ESI,  $m/z$ ) calcd for  $\text{C}_{18}\text{H}_{21}\text{N}_3\text{O}_3$   $[\text{M}-\text{N}_2+\text{H}]^+$  300.15942, found 300.15901.  $[\alpha]_D^{25} = 214.1^\circ$  (c 0.66,  $\text{CHCl}_3$ ); >99% ee; Chiral HPLC analysis of the product: Daicel Chiralpak OJ-H 250X4.6 mm 5u column; hexane/2-propanol = 99/1, detected at 254 nm, Flow rate = 1 mL/min, Retention times: 8.0 min (minor), 14.6 min (major).

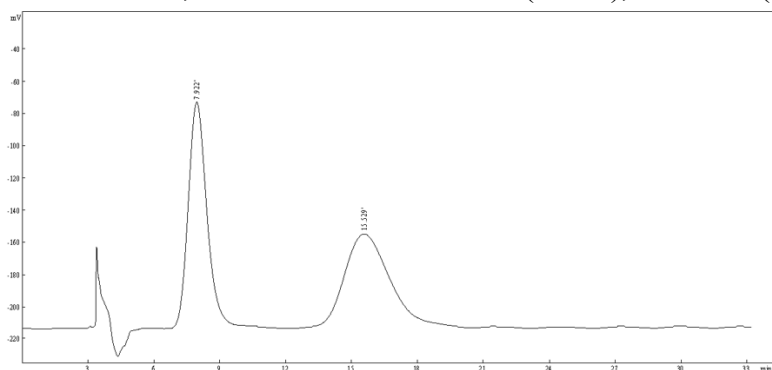

| Peak# | Ret. Time | Area     | Area% |
|-------|-----------|----------|-------|
| 1     | 7.922     | 8216995  | 49.14 |
| 2     | 15.529    | 8506046  | 50.86 |
| Total |           | 16723041 | 100   |

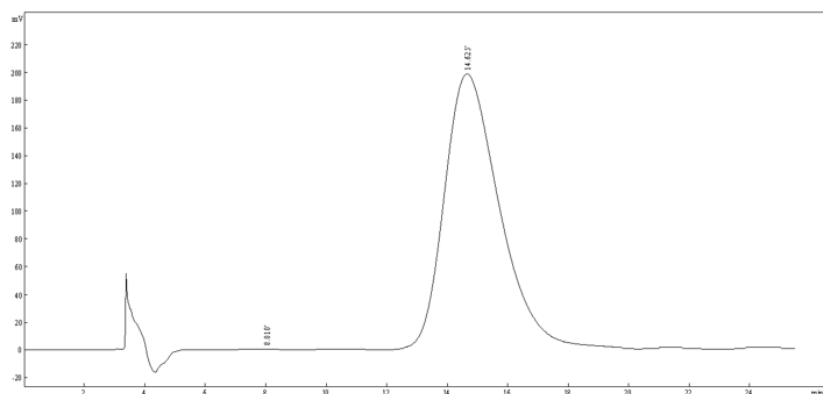

| Peak# | Ret. Time | Area | Area% |
|-------|-----------|------|-------|
| 1     | 14.627    |      |       |

|       |        |          |         |
|-------|--------|----------|---------|
| 1     | 8.010  | 3635     | 0.01442 |
| 2     | 14.625 | 25208736 | 99.98   |
| Total |        | 25212371 | 100     |

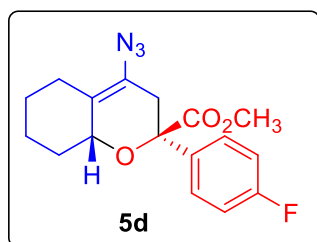

Yellow solid. 82% yield.  $^1\text{H}$  NMR (500 MHz,  $\text{CDCl}_3$ )  $\delta$  7.50 – 7.48 (m, 2H), 7.02 – 6.95 (m, 2H), 4.23 (dd,  $J = 6.3, 3.3$  Hz, 1H), 3.65 (s, 3H), 3.25 (dt,  $J = 15.6, 2.0$  Hz, 1H), 2.79 – 2.73 (m, 1H), 2.45 (dt,  $J = 15.6, 3.0$  Hz, 1H), 2.25 – 2.19 (m, 1H), 1.79 – 1.73 (m, 1H), 1.67 (d,  $J = 12.9$  Hz, 1H), 1.39 – 1.23 (m, 3H), 1.12 – 1.06 (m, 1H).  $^{13}\text{C}$  NMR (126 MHz,  $\text{CDCl}_3$ )  $\delta$  170.82, 161.54 (d,  $J = 247.5$  Hz), 135.36, 125.53 (d,  $J = 8.3$  Hz), 124.16, 119.84, 114.39 (d,  $J = 21.7$  Hz), 77.93, 72.54, 51.87, 33.67, 32.32, 25.28, 24.84, 23.08. HRMS (ESI,  $m/z$ ) calcd for  $\text{C}_{17}\text{H}_{18}\text{FN}_3\text{O}_3$   $[\text{M}-\text{N}_2+\text{H}]^+$  304.13435, found 304.13347.  $[\alpha]_D^{21} = 293.9^\circ$  (c 0.64,  $\text{CHCl}_3$ ); 97% ee; Chiral HPLC analysis of the product: Daicel Chiralpak OJ-H 250X4.6 mm 5u column; hexane/2-propanol = 97/3, detected at 254 nm, Flow rate = 1 mL/min, Retention times: 5.7 min (minor), 7.0 min (major).

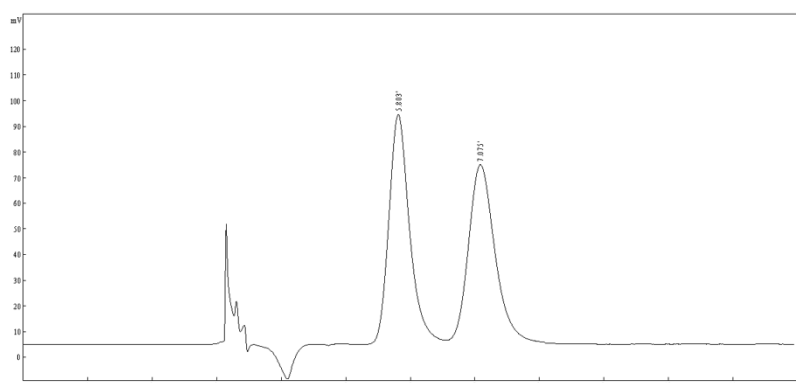

| Peak# | Ret. Time | Area    | Area% |
|-------|-----------|---------|-------|
| 1     | 5.803     | 1945218 | 50.14 |
| 2     | 7.075     | 1934662 | 49.86 |
| Total |           | 3879880 | 100   |

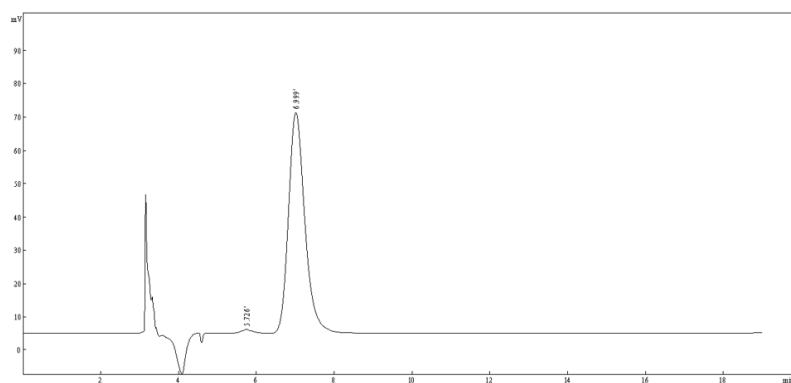

| Peak# | Ret. Time | Area    | Area% |
|-------|-----------|---------|-------|
| 1     | 5.726     | 27250   | 1.383 |
| 2     | 6.999     | 1942475 | 98.61 |
| Total |           | 1969725 | 100   |

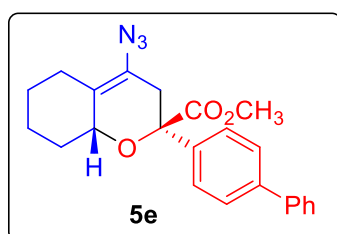

Yellow solid. 86% yield.  $^1\text{H}$  NMR (500 MHz,  $\text{CDCl}_3$ )  $\delta$  7.57 (d,  $J = 8.4$  Hz, 2H), 7.54 – 7.48 (m, 4H), 7.37 (t,  $J = 7.6$  Hz, 2H), 7.28 (t,  $J = 7.4$  Hz, 1H), 4.26 (d,  $J = 8.4$  Hz, 1H), 3.67 (s, 3H), 3.31 (d,  $J = 15.6$  Hz, 1H), 2.77 (dd,  $J = 12.3, 1.8$  Hz, 1H), 2.53 (dt,  $J = 15.6, 3.0$  Hz, 1H), 2.25 (d,  $J = 10.1$  Hz, 1H), 1.80 – 1.74 (m, 1H), 1.67 (d,  $J = 12.7$  Hz, 1H), 1.41 – 1.25 (m, 3H), 1.12 – 1.06 (m, 1H).  $^{13}\text{C}$  NMR (126 MHz,  $\text{CDCl}_3$ )  $\delta$  170.96, 140.14, 139.55, 138.53, 127.77, 126.45, 126.27, 126.11, 124.18, 147.07, 119.99, 78.28, 72.54, 51.86, 33.71, 32.30, 25.31, 24.87, 23.11. HRMS (ESI,  $m/z$ ) calcd for  $\text{C}_{23}\text{H}_{23}\text{N}_3\text{O}_3$   $[\text{M}-\text{N}_2+\text{H}]^+$  362.17507, found 362.17491.  $[\alpha]_D^{25} = 139.4^\circ$  (c 0.32,  $\text{CHCl}_3$ ); >99% ee; Chiral HPLC analysis of the product: Daicel Chiralpak OJ-H 250X4.6 mm 5u column; hexane/2-propanol = 95/5, detected at 254 nm, Flow rate = 1 mL/min, Retention times: 11.4 min (major), 21.0 min (minor).

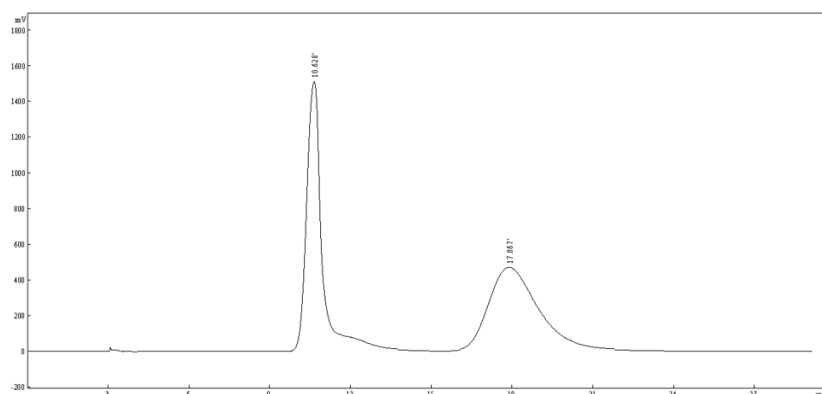

| Peak# | Ret. Time | Area     | Area% |
|-------|-----------|----------|-------|
| 1     | 10.628    | 61047123 | 49.92 |

|       |        |           |       |
|-------|--------|-----------|-------|
| 2     | 17.867 | 61235629  | 50.08 |
| Total |        | 122282752 | 100   |

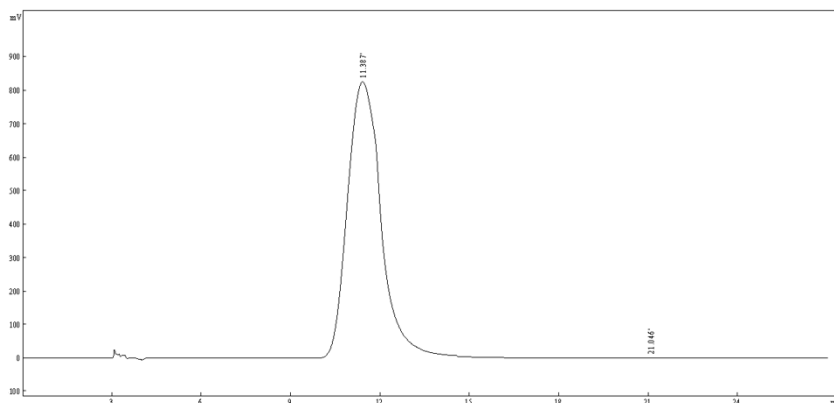

| Peak# | Ret. Time | Area     | Area%   |
|-------|-----------|----------|---------|
| 1     | 11.387    | 65051130 | 99.91   |
| 2     | 21.046    | 57484    | 0.08829 |
| Total |           | 65108614 | 100     |

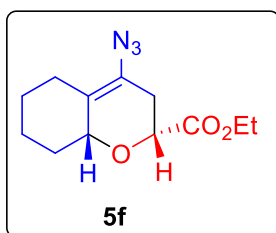

Yellow solid. 95% yield.  $^1\text{H}$  NMR (500 MHz,  $\text{CDCl}_3$ )  $\delta$  4.48 (t,  $J = 5.2$  Hz, 1H), 4.24 – 4.20 (m, 1H), 4.20 – 4.14 (m, 2H), 2.73 (ddt,  $J = 13.9, 4.2, 2.2$  Hz, 1H), 2.58 (td,  $J = 4.4, 2.1$  Hz, 2H), 2.03 – 1.96 (m, 1H), 1.79 – 1.72 (m, 1H), 1.65 (d,  $J = 12.9$  Hz, 1H), 1.50 – 1.43 (m, 1H), 1.35 – 1.28 (m, 2H), 1.24 (t,  $J = 7.1$  Hz, 3H), 1.11 – 1.02 (m, 1H).  $^{13}\text{C}$  NMR (126 MHz,  $\text{CDCl}_3$ )  $\delta$  170.87, 125.74, 120.49, 73.64, 69.67, 61.40, 33.82, 26.67, 26.42, 26.38, 24.38, 14.22. HRMS (ESI,  $m/z$ ) calcd for  $\text{C}_{12}\text{H}_{17}\text{N}_3\text{O}_3$   $[\text{M}-\text{N}_2+\text{H}]^+$  224.12812, found 224.12749.  $[\alpha]_D^{25} = 39.1^\circ$  (c 0.64,  $\text{CHCl}_3$ ); >99% ee; Chiral HPLC analysis of the product: Daicel Chiralpak OJ-H 250X4.6 mm 5u column; hexane/2-propanol = 99/1, detected at 254 nm, Flow rate = 1 mL/min, Retention times: 7.5 min (major), 10.4 min (minor).

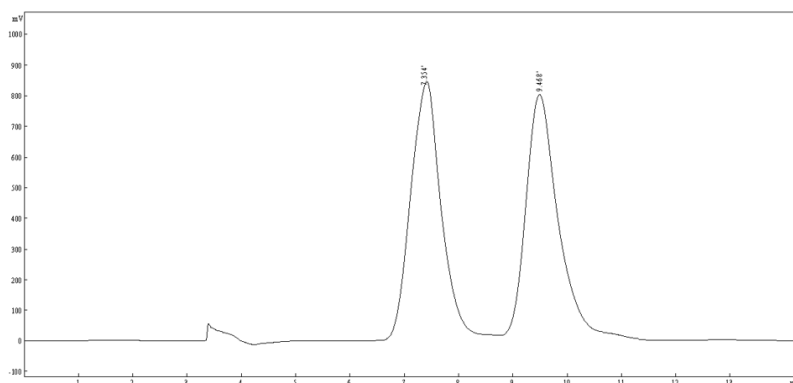

| Peak# | Ret. Time | Area | Area% |
|-------|-----------|------|-------|
|-------|-----------|------|-------|



|       |       |          |       |
|-------|-------|----------|-------|
| 1     | 7.354 | 32085091 | 49.84 |
| 2     | 9.468 | 32286016 | 50.16 |
| Total |       | 64371107 | 100   |

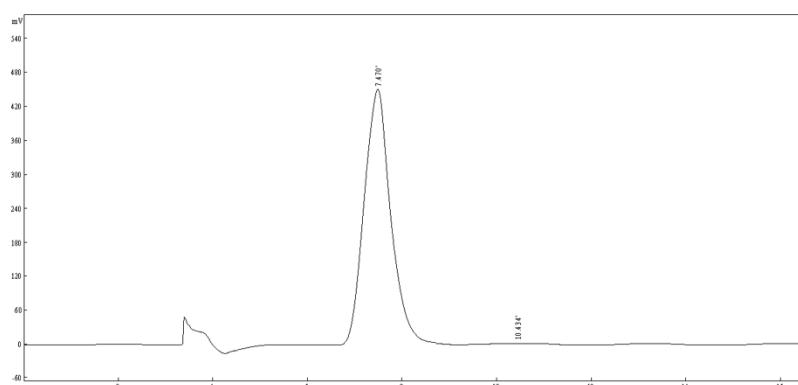

| Peak# | Ret. Time | Area     | Area%  |
|-------|-----------|----------|--------|
| 1     | 7.470     | 17664293 | 99.83  |
| 2     | 10.434    | 30194    | 0.1706 |
| Total |           | 17694487 | 100    |

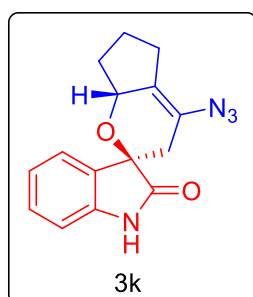

Red solid. 68% yield.  $^1\text{H}$  NMR (500 MHz,  $\text{CDCl}_3$ )  $\delta$  8.09 (s, 1H), 7.31 – 7.25 (m, 2H), 7.07 (td,  $J = 7.6, 0.9$  Hz, 1H), 6.87 (d,  $J = 7.8$  Hz, 1H), 5.06 – 4.99 (m, 1H), 2.67 – 2.60 (m, 1H), 2.59 – 2.49 (m, 2H), 2.47 – 2.39 (m, 1H), 2.15 – 2.08 (m, 1H), 1.92 – 1.84 (m, 1H), 1.75 – 1.70 (m, 1H), 1.58 – 1.50 (m, 1H).  $^{13}\text{C}$  NMR (126 MHz,  $\text{CDCl}_3$ )  $\delta$  176.92, 140.31, 130.57, 130.20, 128.74, 124.26, 123.42, 120.86, 110.21, 75.73, 32.51, 30.52, 29.71, 25.04, 20.69. HRMS (ESI,  $m/z$ ) calcd for  $\text{C}_{15}\text{H}_{14}\text{N}_4\text{O}_2$   $[\text{M}-\text{N}_2+\text{H}]^+$  255.11280, found 255.11220.  $[\alpha]_D^{24} = -214.6^\circ$  (c 0.63,  $\text{CHCl}_3$ ); 81% ee; Chiral HPLC analysis of the product: Phenomenex 00G-4457-E0 250X4.6 mm 5u column; hexane/2-propanol = 90/10, detected at 254 nm, Flow rate = 1 mL/min, Retention times: 10.7 min (minor), 15.4 min (major).

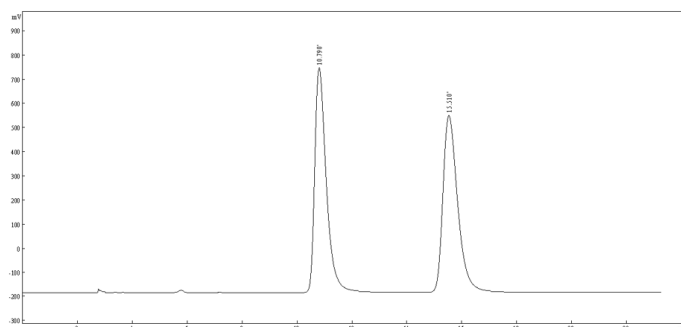

| Peak# | Ret. Time | Area     | Area% |
|-------|-----------|----------|-------|
| 1     | 10.790    | 27156714 | 49.92 |
| 2     | 15.510    | 27246829 | 50.08 |
| Total |           | 54403543 | 100   |

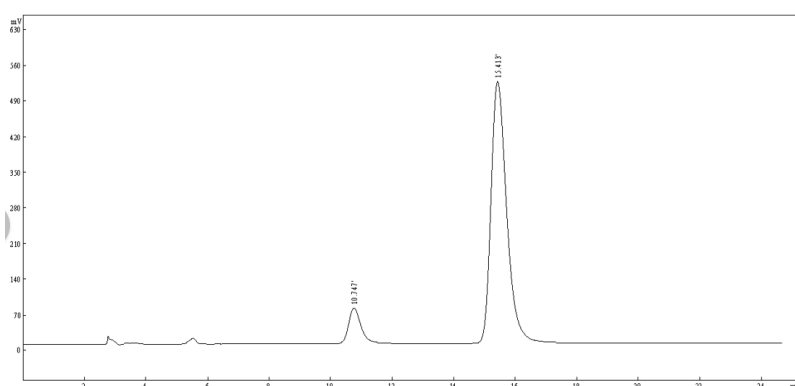

| Peak# | Ret. Time | Area     | Area% |
|-------|-----------|----------|-------|
| 1     | 10.747    | 1949070  | 9.662 |
| 2     | 15.413    | 18223733 | 90.34 |
| Total |           | 20172803 | 100   |

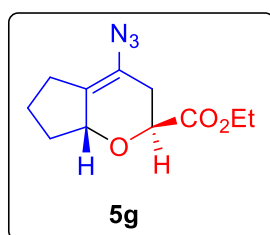

White solid. 78% yield.  $^1\text{H}$  NMR (500 MHz,  $\text{CDCl}_3$ )  $\delta$  4.67 (dd,  $J = 6.7, 3.0$  Hz, 1H), 4.51 – 4.40 (m, 1H), 4.30 – 4.22 (m, 2H), 2.70 – 2.60 (m, 2H), 2.49 – 2.39 (m, 1H), 2.25 – 2.12 (m, 2H), 1.83 – 1.75 (m, 1H), 1.67 – 1.59 (m, 1H), 1.44 (dt,  $J = 11.8, 3.4$  Hz, 1H), 1.32 (t,  $J = 7.1$  Hz, 3H).  $^{13}\text{C}$  NMR (126 MHz,  $\text{CDCl}_3$ )  $\delta$  171.20, 127.54, 121.48, 75.22, 72.02, 61.56, 31.99, 25.42, 24.39, 19.94, 14.24. HRMS (ESI,  $m/z$ ) calcd for  $\text{C}_{11}\text{H}_{15}\text{N}_3\text{O}_3$   $[\text{M}-\text{N}_2+\text{H}]^+$  210.1125, found 210.1119.  $[\alpha]_D^{22} = 45.5^\circ$  (c 1.18,  $\text{CHCl}_3$ ); >99% ee; Chiral HPLC analysis of the product: Phenomenex 00G-4457-E0

250X4.6 mm 5u column; hexane/2-propanol = 99/1, detected at 254 nm, Flow rate = 1 mL/min, Retention times: 11.4 min (major), 15.1 min (minor).

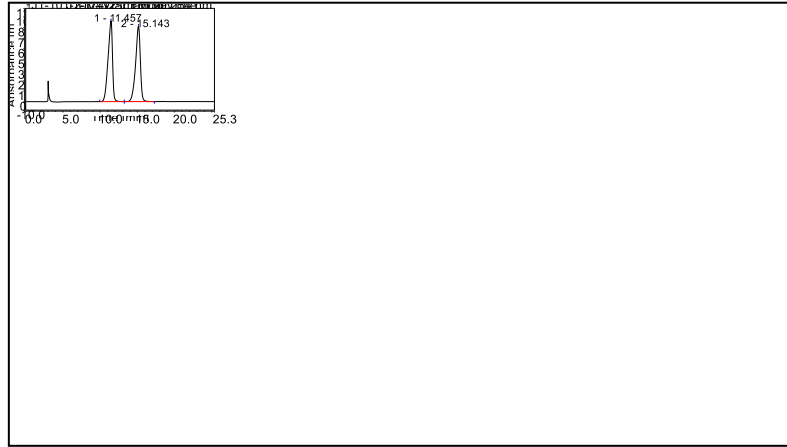

| Integration Results |                       |                 |                |                       |                      |
|---------------------|-----------------------|-----------------|----------------|-----------------------|----------------------|
| No.                 | Retention Time<br>min | Area<br>mAU*min | Height<br>mAU  | Relative<br>Area<br>% | Relative Height<br>% |
| 1                   | 11.457                | 65.999          | 95.639         | 49.92                 | 51.76                |
| 2                   | 15.143                | 66.203          | 89.128         | 50.08                 | 48.24                |
| <b>Total:</b>       |                       | <b>132.202</b>  | <b>184.767</b> | <b>100.00</b>         | <b>100.00</b>        |

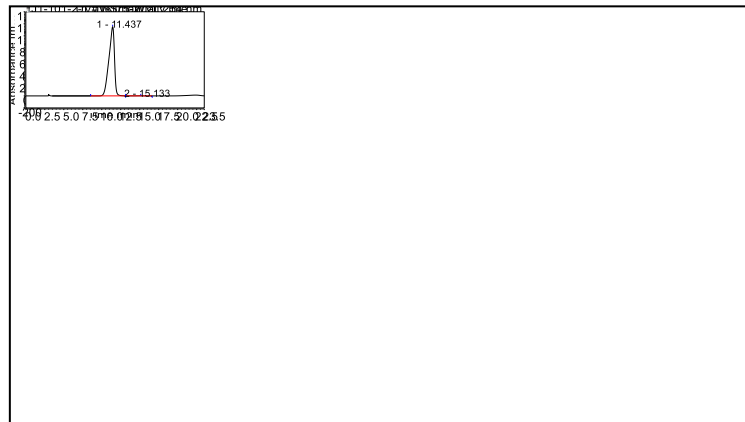

| Integration Results |                       |                 |                 |                       |                      |
|---------------------|-----------------------|-----------------|-----------------|-----------------------|----------------------|
| No.                 | Retention Time<br>min | Area<br>mAU*min | Height<br>mAU   | Relative<br>Area<br>% | Relative Height<br>% |
| 1                   | 11.437                | 975.551         | 1151.535        | 99.83                 | 99.85                |
| 2                   | 15.133                | 1.709           | 1.751           | 0.17                  | 0.15                 |
| <b>Total:</b>       |                       | <b>977.259</b>  | <b>1153.286</b> | <b>100.00</b>         | <b>100.00</b>        |

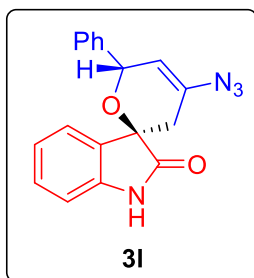

Yellow solid. 42% yield.  $^1\text{H}$  NMR (500 MHz,  $\text{CDCl}_3$ )  $\delta$  8.06 (s, 1H), 7.41 – 7.33 (m, 5H), 7.31 – 7.25 (m, 2H), 7.06 (dd,  $J = 11.1, 4.0$  Hz, 1H), 6.86 (d,  $J = 7.8$  Hz, 1H), 5.97 (d,  $J = 2.4$  Hz, 1H), 5.62 (t,  $J = 1.8$  Hz, 1H), 2.87 – 2.80 (m, 1H), 2.28 (dd,  $J = 17.5, 2.2$  Hz, 1H).  $^{13}\text{C}$  NMR (126 MHz,  $\text{CDCl}_3$ )  $\delta$  176.34, 140.30, 130.47, 130.34, 129.88, 128.65, 128.33, 127.36, 124.53, 123.36, 113.36, 110.12, 75.61, 74.00, 31.37, 29.72. HRMS (ESI,  $m/z$ ) calcd for  $\text{C}_{18}\text{H}_{14}\text{N}_4\text{O}_2$   $[\text{M}-\text{N}_2+\text{H}]^+$  291.1128, found 291.1138.  $[\alpha]_D^{22} = -16.4^\circ$  (c 0.61,  $\text{CHCl}_3$ ); 93% ee; Chiral HPLC analysis of the product: Phenomenex 00G-4457-E0 250X4.6 mm 5u column; hexane/2-propanol = 90/10, detected at 254 nm, Flow rate = 1 mL/min, Retention times: 9.7 min (minor), 12.7 min (major).

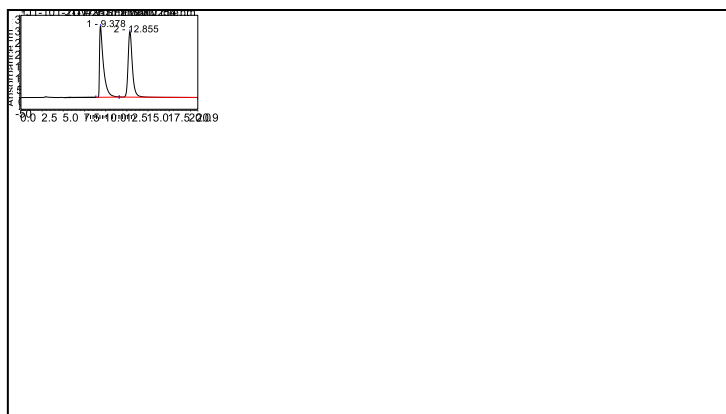

| Integration Results |                       |                 |                |                       |                      |
|---------------------|-----------------------|-----------------|----------------|-----------------------|----------------------|
| No.                 | Retention Time<br>min | Area<br>mAU*min | Height<br>mAU  | Relative<br>Area<br>% | Relative Height<br>% |
| 1                   | 9.378                 | 161.411         | 303.259        | 50.07                 | 51.99                |
| 2                   | 12.855                | 160.980         | 280.056        | 49.93                 | 48.01                |
| <b>Total:</b>       |                       | <b>322.392</b>  | <b>583.315</b> | <b>100.00</b>         | <b>100.00</b>        |

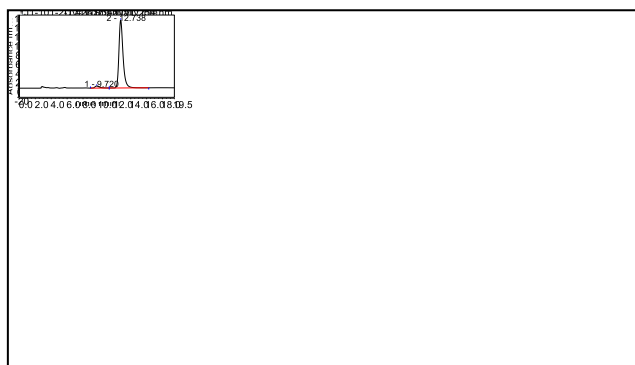

| Integration Results |                       |                 |                |                       |                      |
|---------------------|-----------------------|-----------------|----------------|-----------------------|----------------------|
| No.                 | Retention Time<br>min | Area<br>mAU*min | Height<br>mAU  | Relative<br>Area<br>% | Relative Height<br>% |
| 1                   | 9.720                 | 3.199           | 4.523          | 3.47                  | 2.95                 |
| 2                   | 12.738                | 89.096          | 148.611        | 96.53                 | 97.05                |
| <b>Total:</b>       |                       | <b>92.295</b>   | <b>153.135</b> | <b>100.00</b>         | <b>100.00</b>        |

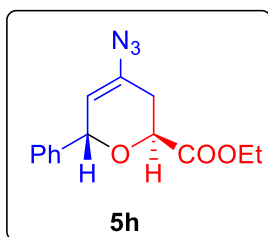

White solid. 82% yield.  $^1\text{H}$  NMR (500 MHz,  $\text{CDCl}_3$ )  $\delta$  7.41 – 7.35 (m, 4H), 7.35 – 7.29 (m, 1H), 5.61 – 5.59 (m, 1H), 5.59 – 5.56 (m, 1H), 4.40 (dd,  $J = 6.9, 5.6$  Hz, 1H), 4.27 – 4.21 (m, 2H), 2.58 – 2.50 (m, 2H), 1.29 (t,  $J = 7.1$  Hz, 3H).  $^{13}\text{C}$  NMR (126 MHz,  $\text{CDCl}_3$ )  $\delta$  170.57, 139.71, 133.62, 128.58, 128.40, 127.94, 111.47, 74.08, 68.50, 61.46, 28.39, 14.18. HRMS (ESI,  $m/z$ ) calcd for  $\text{C}_{14}\text{H}_{15}\text{N}_3\text{O}_3$   $[\text{M}-\text{N}_2+\text{H}]^+$  246.1125, found 246.1125.  $[\alpha]_D^{22} = -21.5^\circ$  (c 1.01,  $\text{CHCl}_3$ ); >99% ee; Chiral HPLC analysis of the product: Daicel Chiralpak OJ-H 250X4.6 mm 5u column; hexane/2-propanol = 90/10, detected at 254 nm, Flow rate = 1 mL/min, Retention times: 17.0 min (major), 28.0 min (minor).

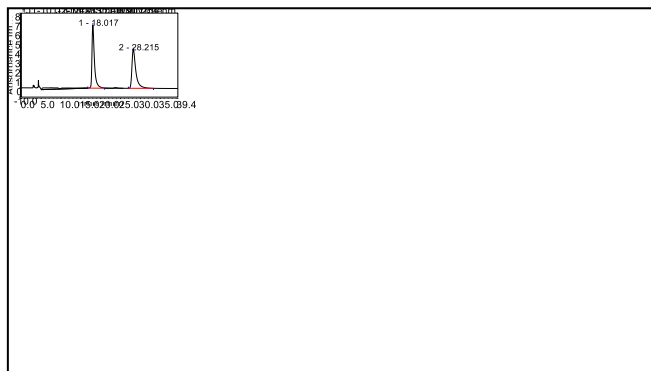

| Integration Results |                       |                 |                |                       |                      |
|---------------------|-----------------------|-----------------|----------------|-----------------------|----------------------|
| No.                 | Retention Time<br>min | Area<br>mAU*min | Height<br>mAU  | Relative<br>Area<br>% | Relative Height<br>% |
| 1                   | 18.017                | 49.156          | 67.754         | 50.55                 | 61.92                |
| 2                   | 28.215                | 48.077          | 41.661         | 49.45                 | 38.08                |
| <b>Total:</b>       |                       | <b>97.233</b>   | <b>109.415</b> | <b>100.00</b>         | <b>100.00</b>        |

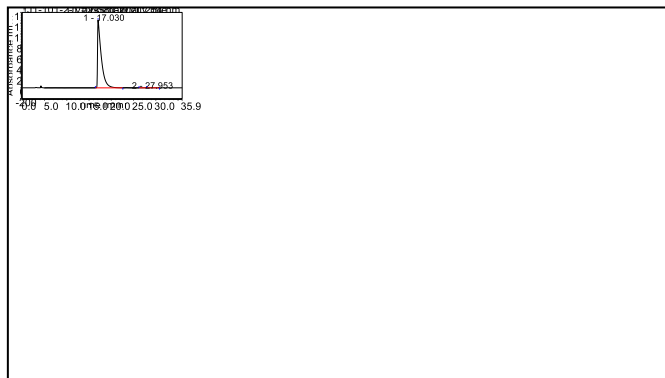

| Integration Results |                       |                 |                 |                       |                      |
|---------------------|-----------------------|-----------------|-----------------|-----------------------|----------------------|
| No.                 | Retention Time<br>min | Area<br>mAU*min | Height<br>mAU   | Relative<br>Area<br>% | Relative Height<br>% |
| 1                   | 17.030                | 1215.493        | 1261.838        | 99.79                 | 99.84                |
| 2                   | 27.953                | 2.573           | 2.004           | 0.21                  | 0.16                 |
| <b>Total:</b>       |                       | <b>1218.066</b> | <b>1263.842</b> | <b>100.00</b>         | <b>100.00</b>        |

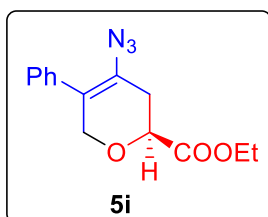

Yellow solid. 26% yield.  $^1\text{H}$  NMR (500 MHz,  $\text{CDCl}_3$ )  $\delta$  7.39 – 7.33 (m, 2H), 7.31 – 7.25 (m, 3H), 4.61 (dt,  $J = 16.0, 1.7$  Hz, 1H), 4.46 - 4.41 (m, 2H), 4.31 (qd,  $J = 7.1,$

4.1 Hz, 2H), 2.80 – 2.68 (m, 2H), 1.35 (t,  $J = 7.1$  Hz, 3H).  $^{13}\text{C}$  NMR (126 MHz,  $\text{CDCl}_3$ )  $\delta$  170.07, 134.75, 128.40, 128.27, 127.93, 125.37, 122.46, 72.57, 68.41, 61.70, 27.76, 14.23. HRMS (ESI,  $m/z$ ) calcd for  $\text{C}_{14}\text{H}_{15}\text{N}_3\text{O}_3$   $[\text{M}-\text{N}_2+\text{H}]^+$  246.1125, found 246.1125.  $[\alpha]_D^{22} = -134.5^\circ$  (c 2.45,  $\text{CHCl}_3$ ); 98% ee; Chiral HPLC analysis of the product: Daicel Chiralpak OJ-H 250X4.6 mm 5u column; hexane/2-propanol = 80/20, detected at 254 nm, Flow rate = 1 mL/min, Retention times: 15.1 min (major), 17.8 min (minor).

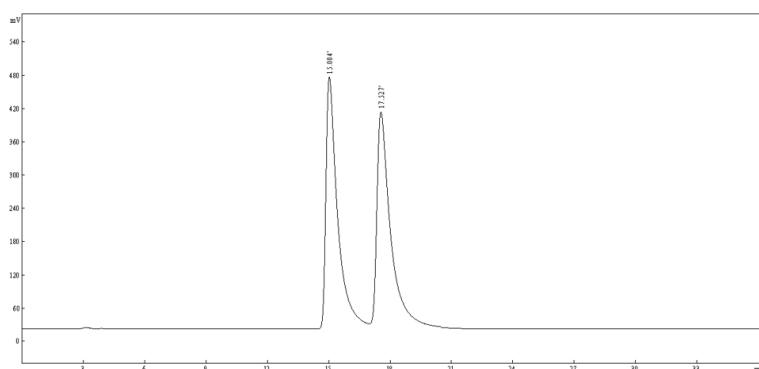

| Peak# | Ret. Time | Area     | Area% |
|-------|-----------|----------|-------|
| 1     | 15.004    | 17433181 | 50.19 |
| 2     | 17.527    | 17301514 | 59.81 |
| Total |           | 34734755 | 100   |

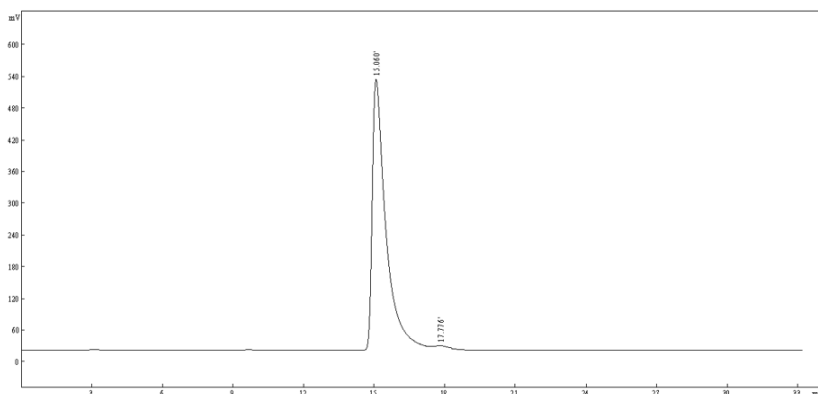

| Peak# | Ret. Time | Area     | Area% |
|-------|-----------|----------|-------|
| 1     | 15.060    | 20288210 | 99.42 |
| 2     | 17.776    | 118665   | 0.58  |
| Total |           | 20406929 | 100   |

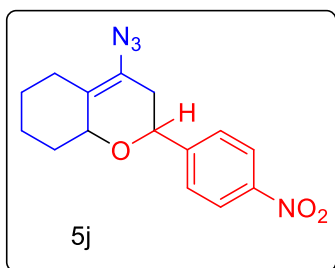

Brown solid. 56% yield.  $^1\text{H}$  NMR (500 MHz,  $\text{CDCl}_3$ )  $\delta$  8.21 – 8.13 (m, 2H), 7.51 (d,  $J$  = 8.5 Hz, 2H), 4.72 – 4.64 (m, 1H), 4.09 (d,  $J$  = 25.6 Hz, 1H), 2.87 – 2.77 (m, 1H), 2.41 (dt,  $J$  = 6.9, 2.6 Hz, 2H), 2.18 – 2.09 (m, 1H), 1.82 – 1.74 (m, 1H), 1.72 – 1.66 (m, 1H), 1.58 – 1.51 (m, 1H), 1.36 – 1.27 (m, 2H), 1.16 – 1.10 (m, 1H).  $^{13}\text{C}$  NMR (126 MHz,  $\text{CDCl}_3$ )  $\delta$  148.77, 147.47, 126.61, 126.03, 123.77, 122.09, 76.24, 73.79, 34.09, 32.80, 25.97, 25.64, 24.00. HRMS (ESI,  $m/z$ ) calcd for  $\text{C}_{15}\text{H}_{16}\text{N}_4\text{O}_3$   $[\text{M}-\text{N}_2+\text{H}]^+$  273.1234, found 273.1209.  $[\alpha]^{22}_{\text{D}} = -14.6^\circ$  (c 0.72,  $\text{CHCl}_3$ ); 91% ee; Chiral HPLC analysis of the product: Phenomenex 00G-4457-E0 250X4.6 mm 5u column; hexane/2-propanol = 98/2, detected at 254 nm, Flow rate = 1 mL/min, Retention times: 17.2 min (major), 18.9 min (minor).

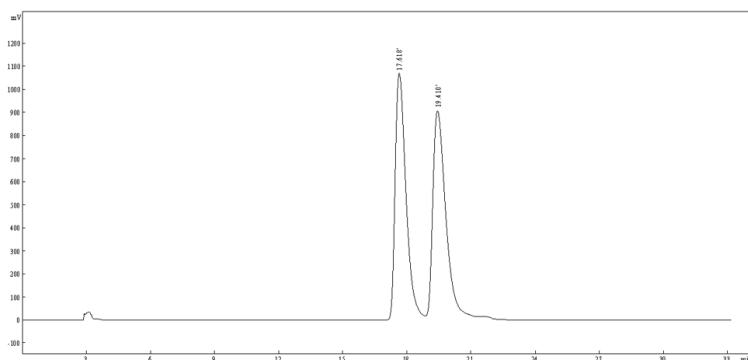

| Peak# | Ret. Time | Area     | Area% |
|-------|-----------|----------|-------|
| 1     | 17.618    | 36759840 | 50.24 |
| 2     | 19.410    | 36410966 | 49.76 |
| Total |           | 73170806 | 100   |

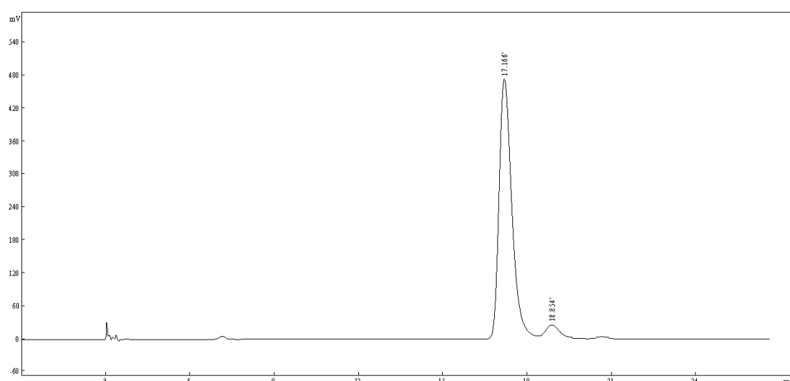

| Peak# | Ret. Time | Area     | Area% |
|-------|-----------|----------|-------|
| 1     | 17.166    | 14663638 | 95.5  |
| 2     | 18.854    | 690114   | 4.495 |
| Total |           | 15353752 | 100   |



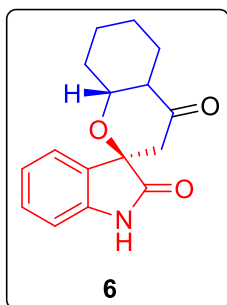

White solid. 81% yield.  $^1\text{H}$  NMR (500 MHz,  $\text{CDCl}_3$ )  $\delta$  8.48 (s, 1H), 7.38 (t,  $J = 6.2$  Hz, 1H), 7.29 (td,  $J = 7.7, 1.2$  Hz, 1H), 7.13 – 7.08 (m, 1H), 6.90 (dd,  $J = 7.7, 3.8$  Hz, 1H), 4.60 (td,  $J = 10.7, 4.0$  Hz, 1H), 2.90 (dd,  $J = 14.6, 1.0$  Hz, 1H), 2.55 – 2.46 (m, 1H), 2.44 – 2.34 (m, 1H), 2.16 – 2.05 (m, 1H), 2.00 (dt,  $J = 15.9, 5.8$  Hz, 1H), 1.86 – 1.77 (m, 2H), 1.55 – 1.28 (m, 4H).  $^{13}\text{C}$  NMR (126 MHz,  $\text{CDCl}_3$ )  $\delta$  205.07, 177.07, 140.38, 130.44, 129.07, 124.25, 123.37, 110.63, 78.78, 75.86, 55.32, 45.73, 33.19, 24.81, 24.35, 23.06. HRMS (ESI,  $m/z$ ) calcd for  $\text{C}_{16}\text{H}_{17}\text{NO}_3$   $[\text{M}+\text{H}]^+$  272.1281, found 272.1307.  $[\alpha]_D^{25} = 71.6^\circ$  (c 1.55,  $\text{CHCl}_3$ ); 96% ee; Chiral HPLC analysis of the product: Phenomenex 00G-4457-E0 250X4.6 mm 5u column; hexane/2-propanol = 90/10, detected at 254 nm, Flow rate = 1 mL/min, Retention times: 19.6 min (minor), 37.2min (major).

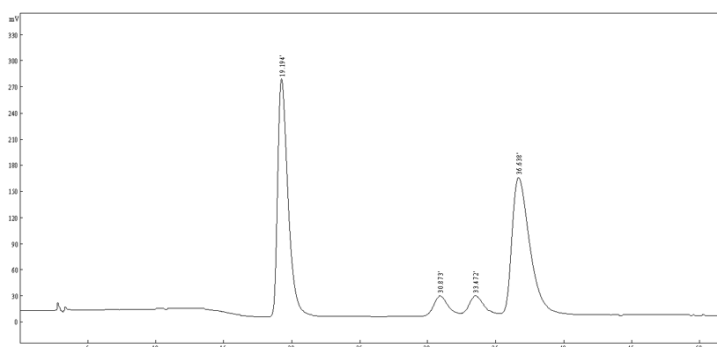

| Peak# | Ret. Time | Area     | Area% |
|-------|-----------|----------|-------|
| 1     | 19.194    | 14562179 | 50.34 |
| 4     | 36.638    | 14367328 | 49.66 |
| Total |           | 28929507 | 100   |

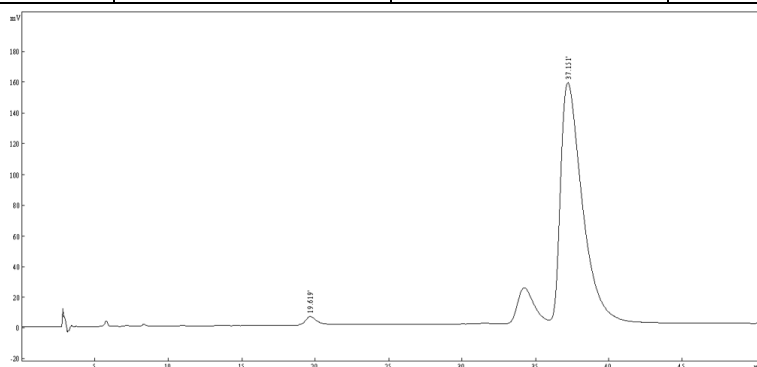

| Peak# | Ret. Time | Area   | Area% |
|-------|-----------|--------|-------|
| 1     | 19.619    | 291450 | 1.828 |

|       |        |          |       |
|-------|--------|----------|-------|
| 4     | 37.151 | 15650818 | 98.17 |
| Total |        | 15942268 | 100   |

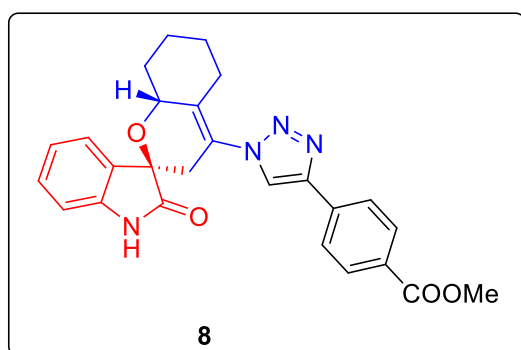

Yellow solid. 72% yield.  $^1\text{H}$  NMR (500 MHz,  $\text{CDCl}_3$ )  $\delta$  8.09 (d,  $J = 8.6$  Hz, 2H), 7.94 (s, 1H), 7.94 – 7.90 (m, 2H), 7.38 (d,  $J = 7.4$  Hz, 1H), 7.28 (d,  $J = 8.6$  Hz, 1H), 7.09 (td,  $J = 7.6, 0.9$  Hz, 1H), 6.87 (d,  $J = 7.8$  Hz, 1H), 4.89 – 4.84 (m, 1H), 3.93 (s, 3H), 3.30 (dt,  $J = 17.4, 2.8$  Hz, 1H), 2.51 (dt,  $J = 32.1, 8.4$  Hz, 2H), 2.26 – 2.20 (m, 1H), 1.90 (d,  $J = 10.3$  Hz, 3H), 1.63 – 1.51 (m, 2H), 1.50 – 1.32 (m, 2H).  $^{13}\text{C}$  NMR (126 MHz,  $\text{CDCl}_3$ )  $\delta$  176.25, 166.82, 146.20, 140.37, 137.35, 134.69, 130.33, 130.27, 129.65, 129.60, 125.53, 124.64, 123.38, 121.57, 120.70, 110.08, 74.15, 72.47, 52.19, 34.77, 33.80, 26.76, 26.25, 23.94. HRMS (ESI,  $m/z$ ) calcd for  $\text{C}_{26}\text{H}_{24}\text{N}_4\text{O}_4$   $[\text{M}+\text{H}]^+$  457.1870, found 457.2111.  $[\alpha]_D^{25} = -34.6^\circ$  (c 1.34,  $\text{CHCl}_3$ ); 98% ee; Chiral HPLC analysis of the product: Daicel Chiralpak AD-H 250X4.6 mm 5u column; hexane/2-propanol = 75/25, detected at 254 nm, Flow rate = 1 mL/min, Retention times: 19.4 min (minor), 26.5 min (major).

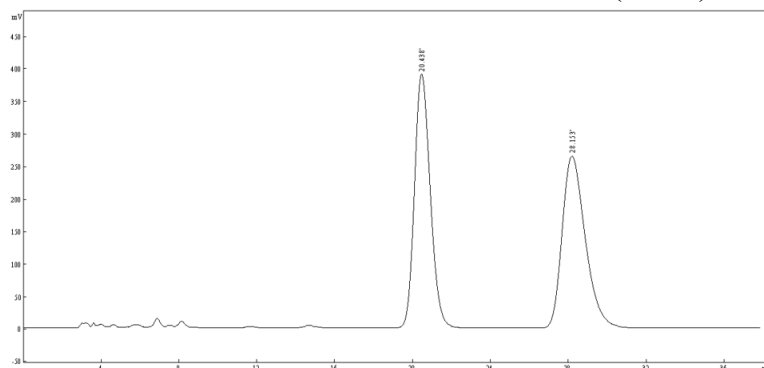

| Peak# | Ret. Time | Area     | Area% |
|-------|-----------|----------|-------|
| 1     | 20.438    | 22065830 | 50.11 |
| 2     | 28.153    | 21965450 | 49.89 |
| Total |           | 44031280 | 100   |

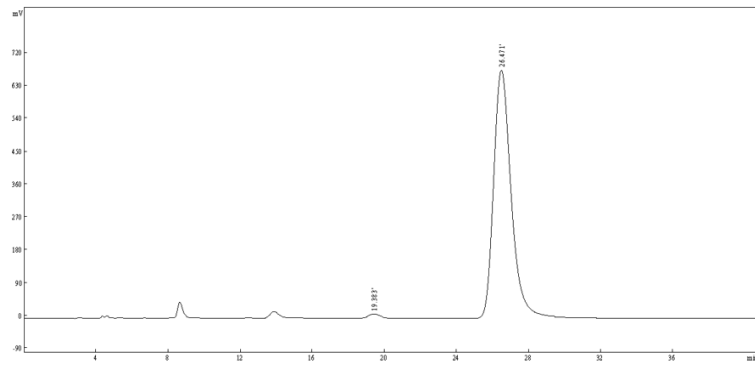

| Peak# | Ret. Time | Area     | Area% |
|-------|-----------|----------|-------|
| 1     | 19.383    | 550193   | 1.179 |
| 2     | 26.471    | 46104403 | 98.82 |
| Total |           | 46654596 | 100   |

## 7. Supplementary spectra

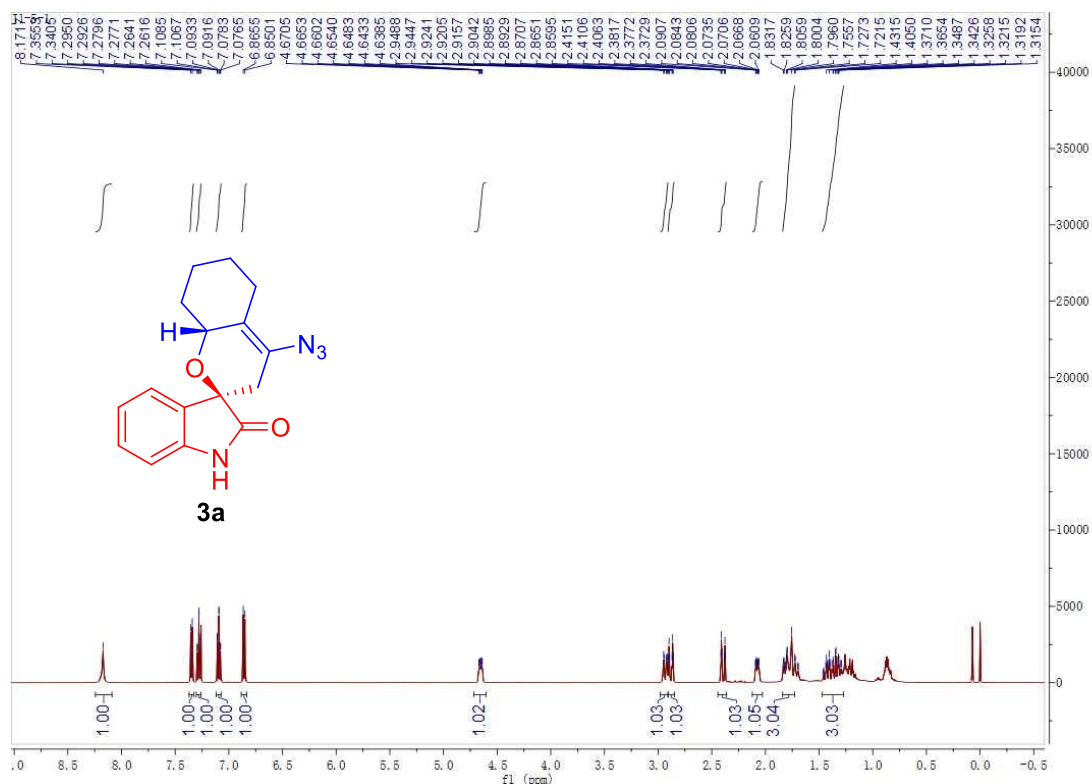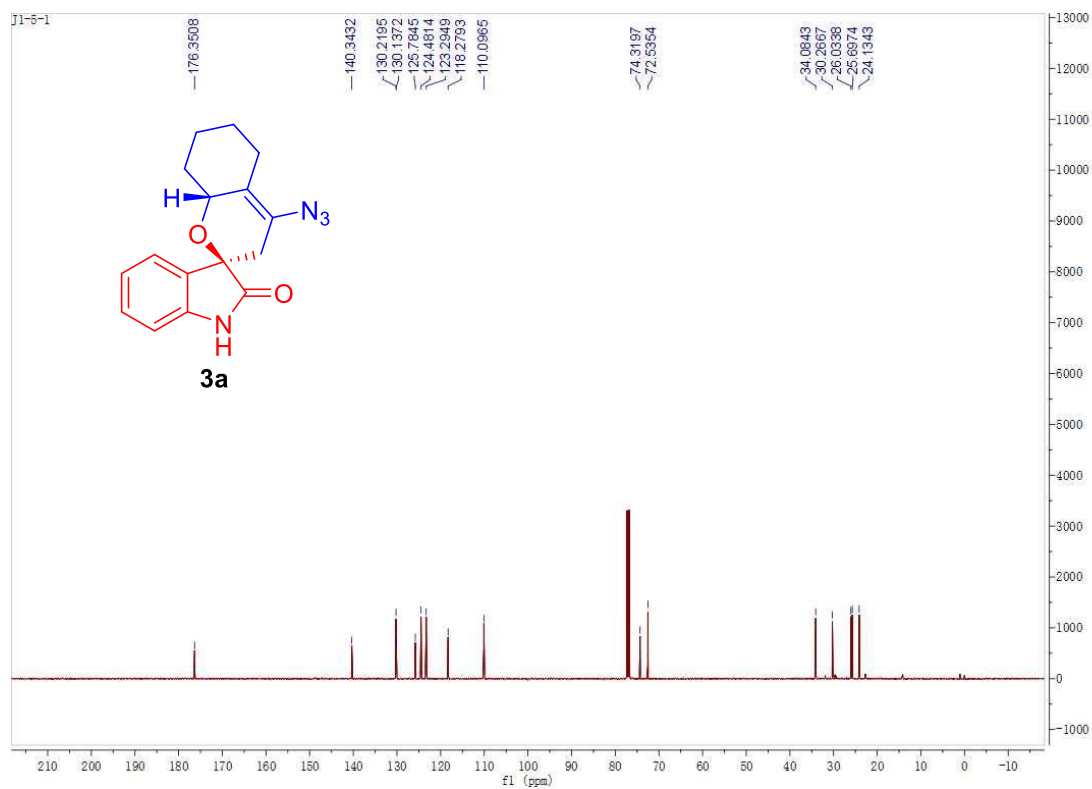

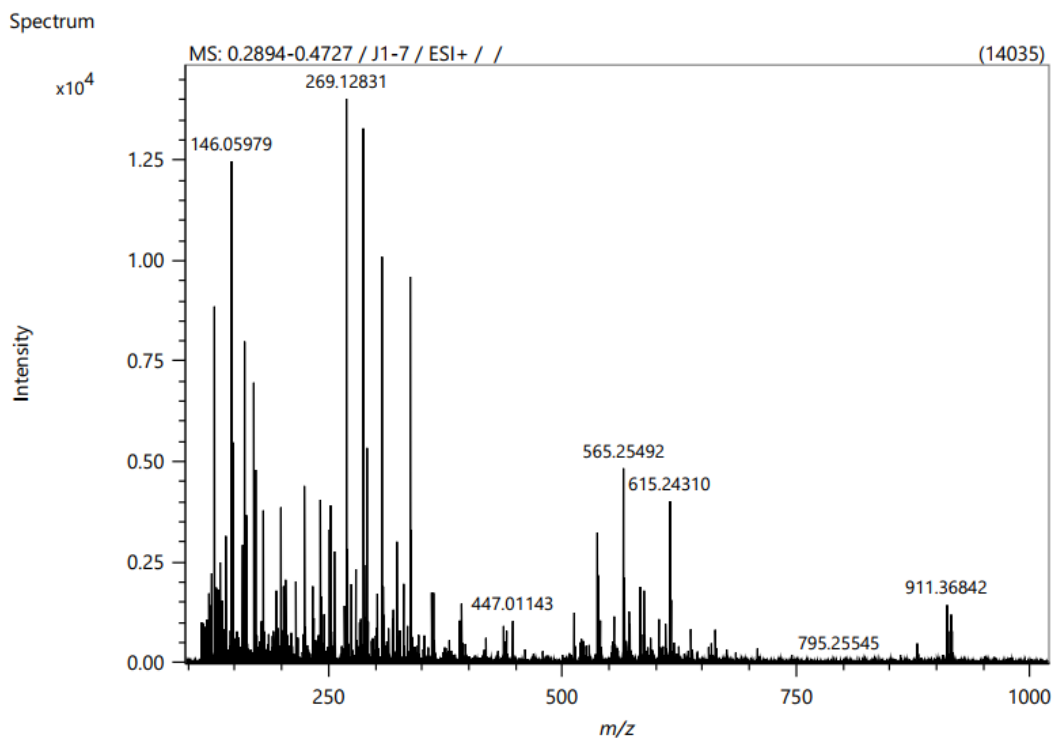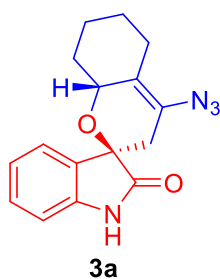

Exact Mass: 296.1273

Molecular Weight: 296.3300

m/z: 296.1273 (100.0%), 297.1307 (17.3%), 297.1244 (1.5%), 298.1340 (1.4%)

Elemental Analysis: C, 64.85; H, 5.44; N, 18.91; O, 10.80

HRMS (ESI, m/z) calcd for  $C_{16}H_{16}N_4O_2$   $[M-N_2+H]^+$  269.12831, found 269.12845.

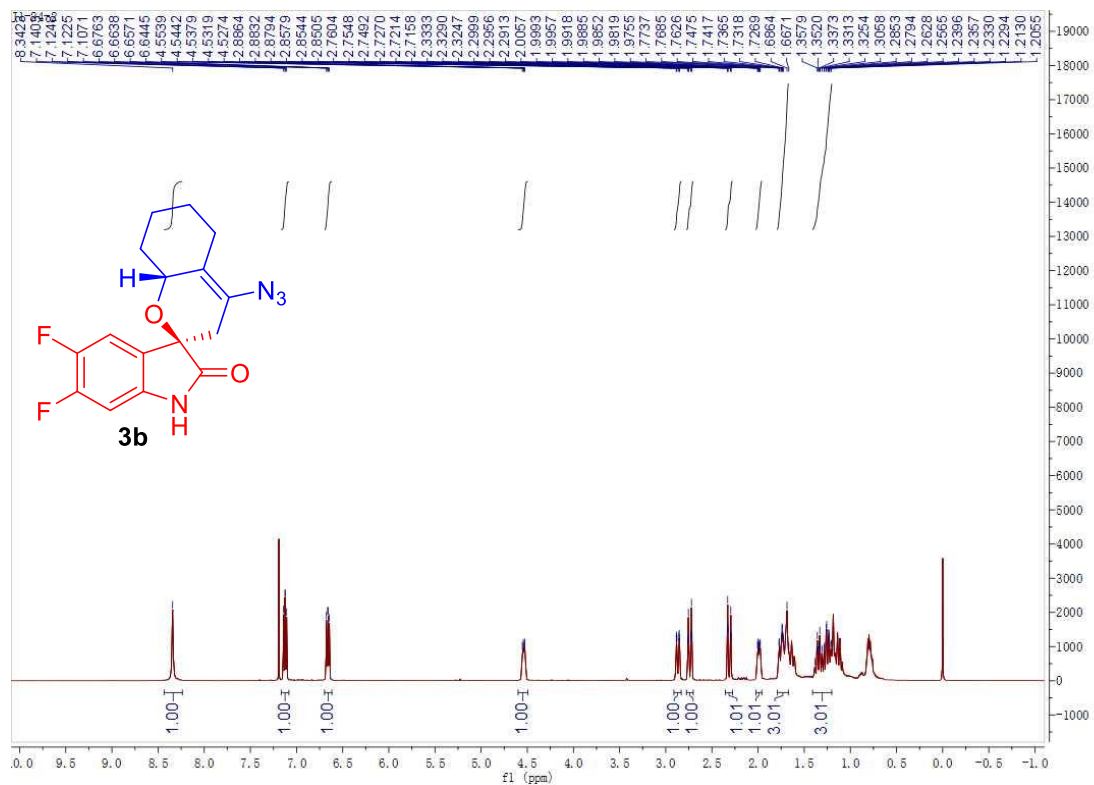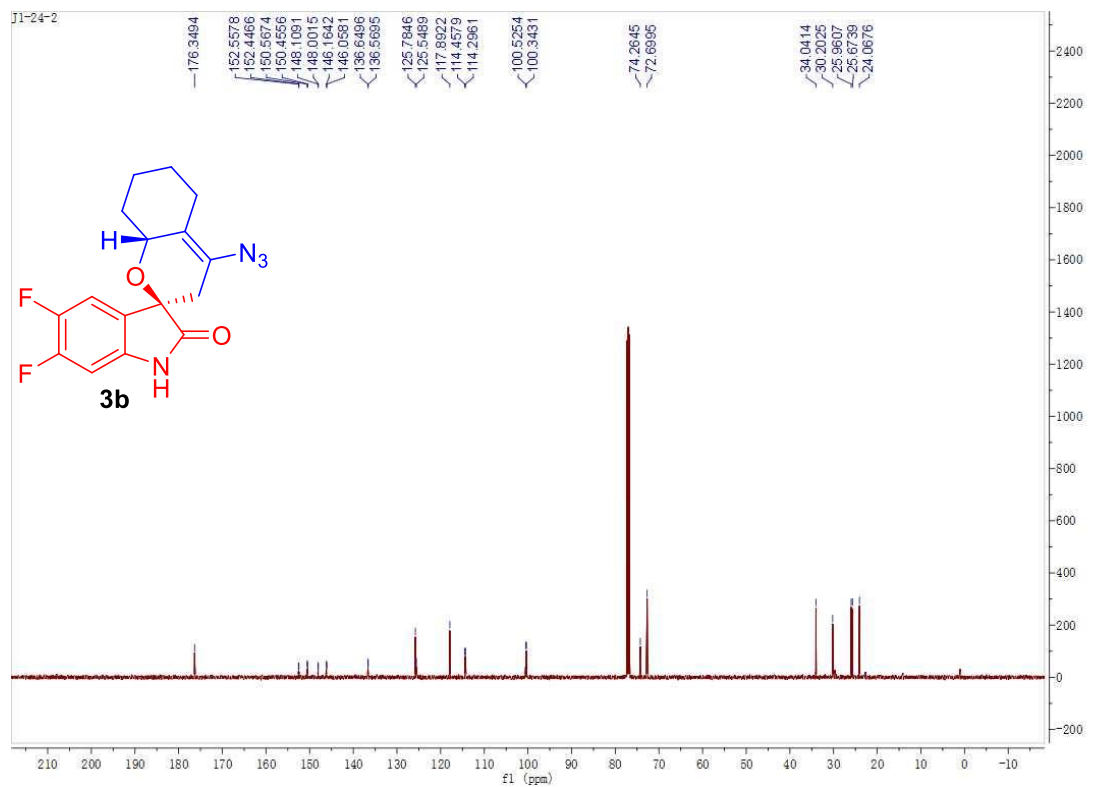

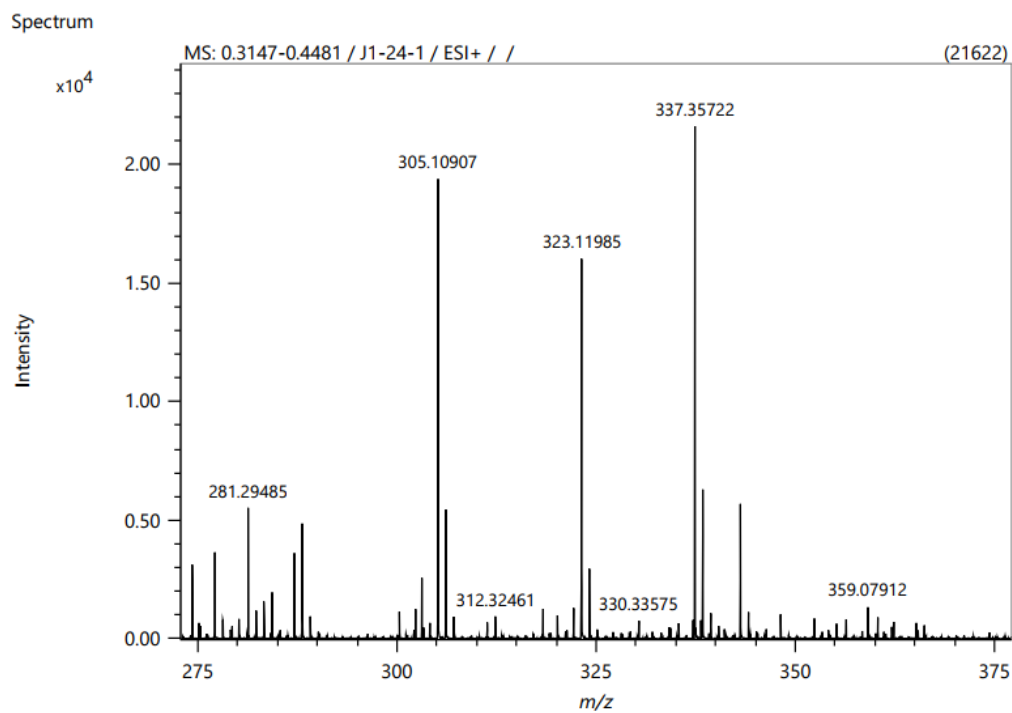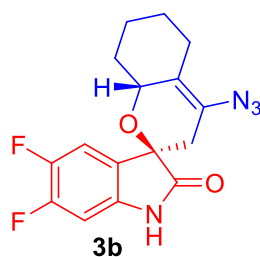

Exact Mass: 332.1085

Molecular Weight: 332.3108

m/z: 332.1085 (100.0%), 333.1118 (17.3%), 333.1055 (1.5%), 334.1152 (1.4%)

Elemental Analysis: C, 57.83; H, 4.25; F, 11.43; N, 16.86; O, 9.63

HRMS (ESI, m/z) calcd for  $C_{16}H_{14}F_2N_4O_2 [M-N_2+H]^+$  305.10961, found 305.10907.

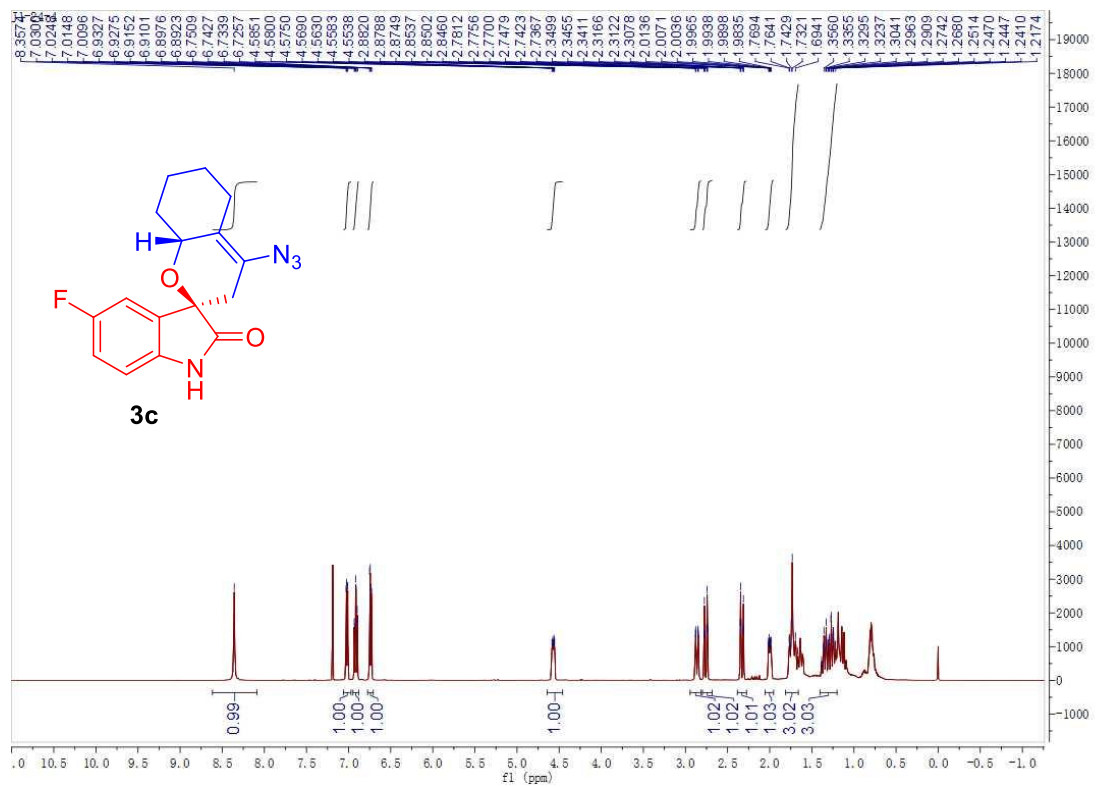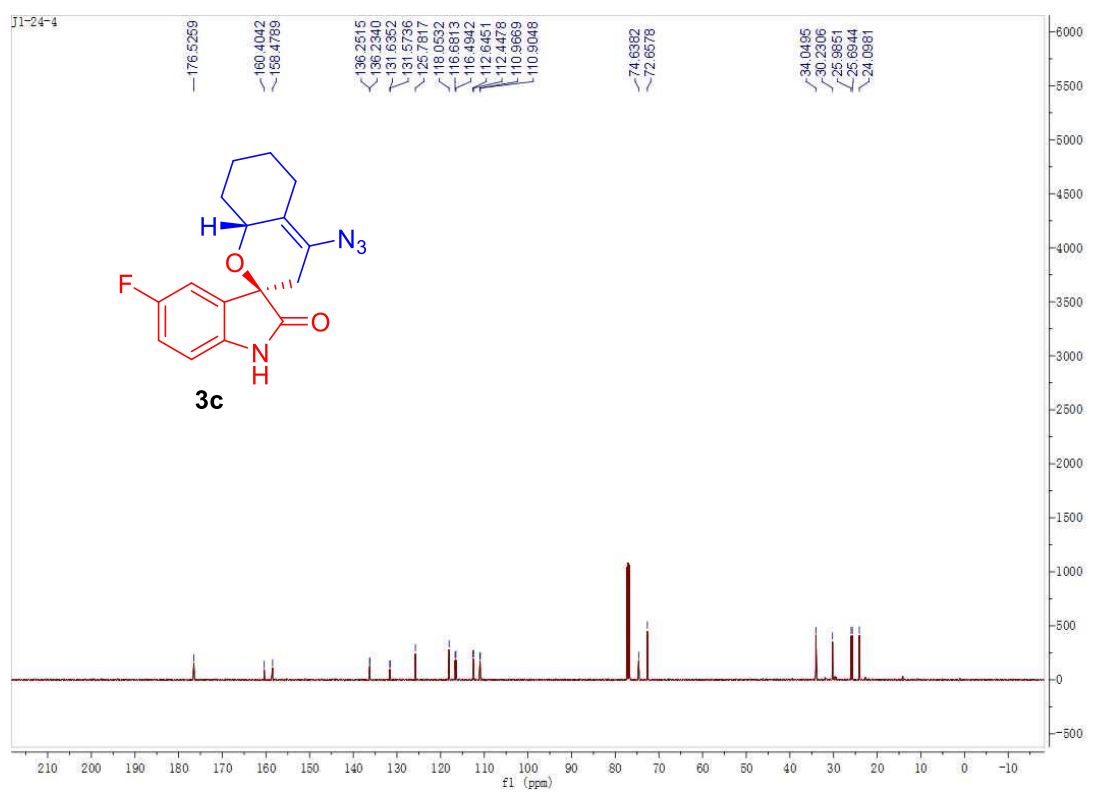



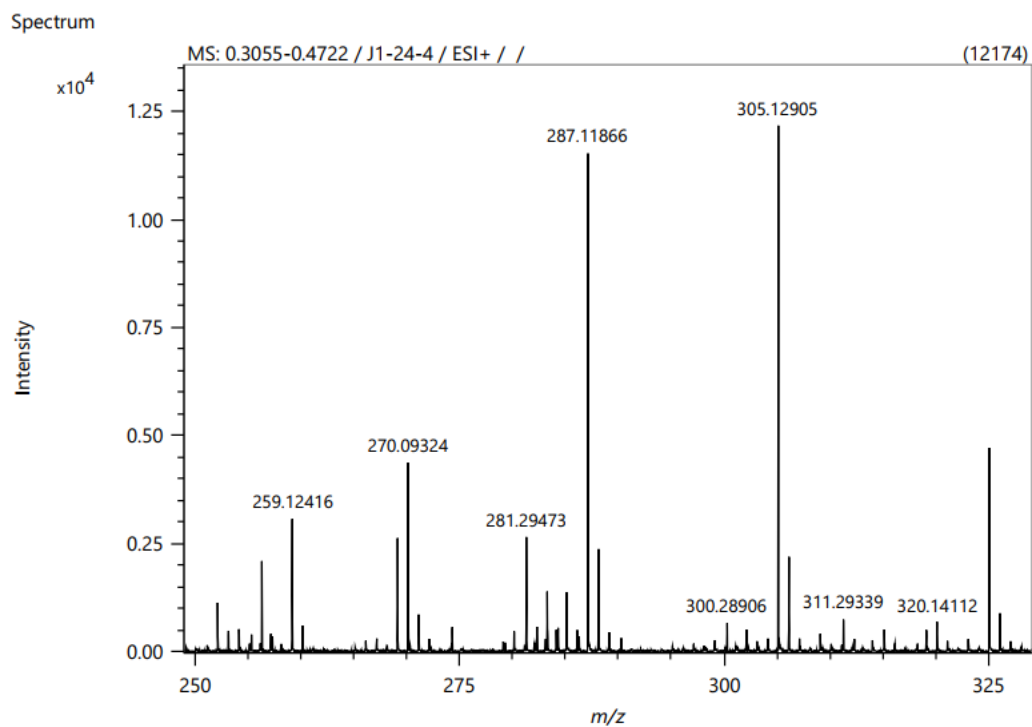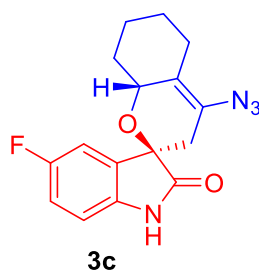

Exact Mass: 314.1179

Molecular Weight: 314.3204

m/z: 314.1179 (100.0%), 315.1213 (17.3%), 315.1149 (1.5%), 316.1246 (1.4%)

Elemental Analysis: C, 61.14; H, 4.81; F, 6.04; N, 17.83; O, 10.18

HRMS (ESI, m/z) calcd for  $C_{16}H_{15}FN_4O_2$   $[M-N_2+H]^+$  287.11903, found 287.11866.

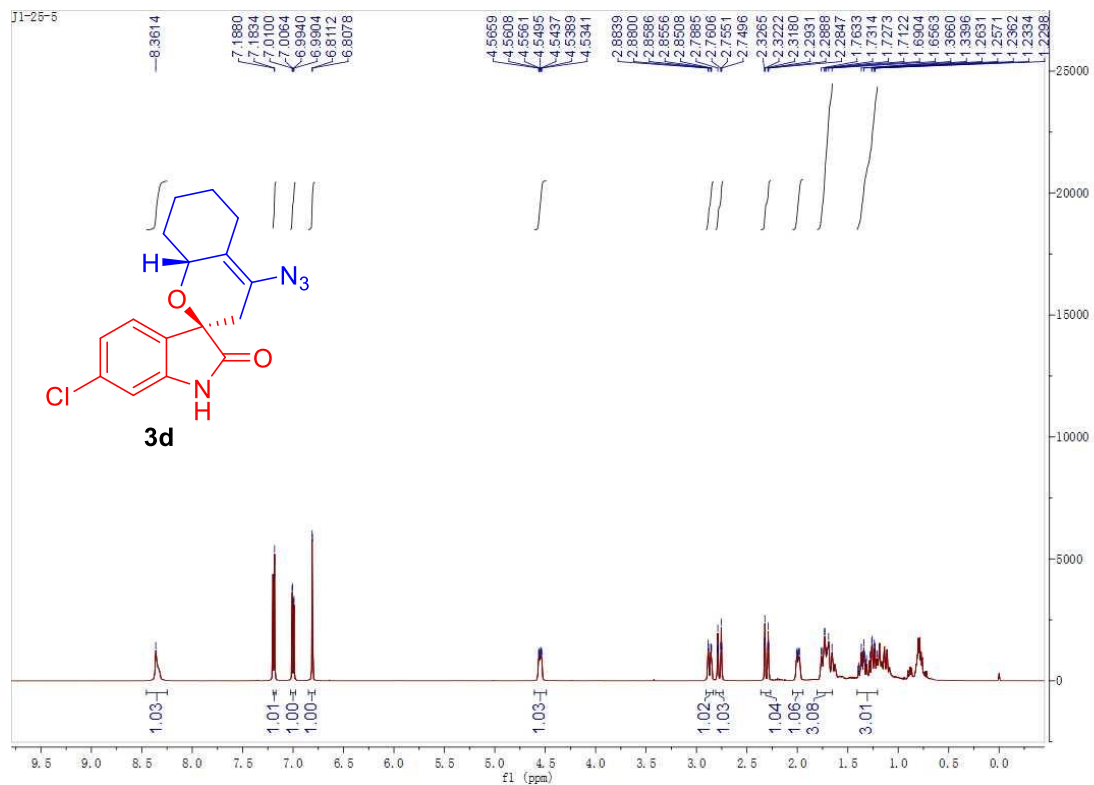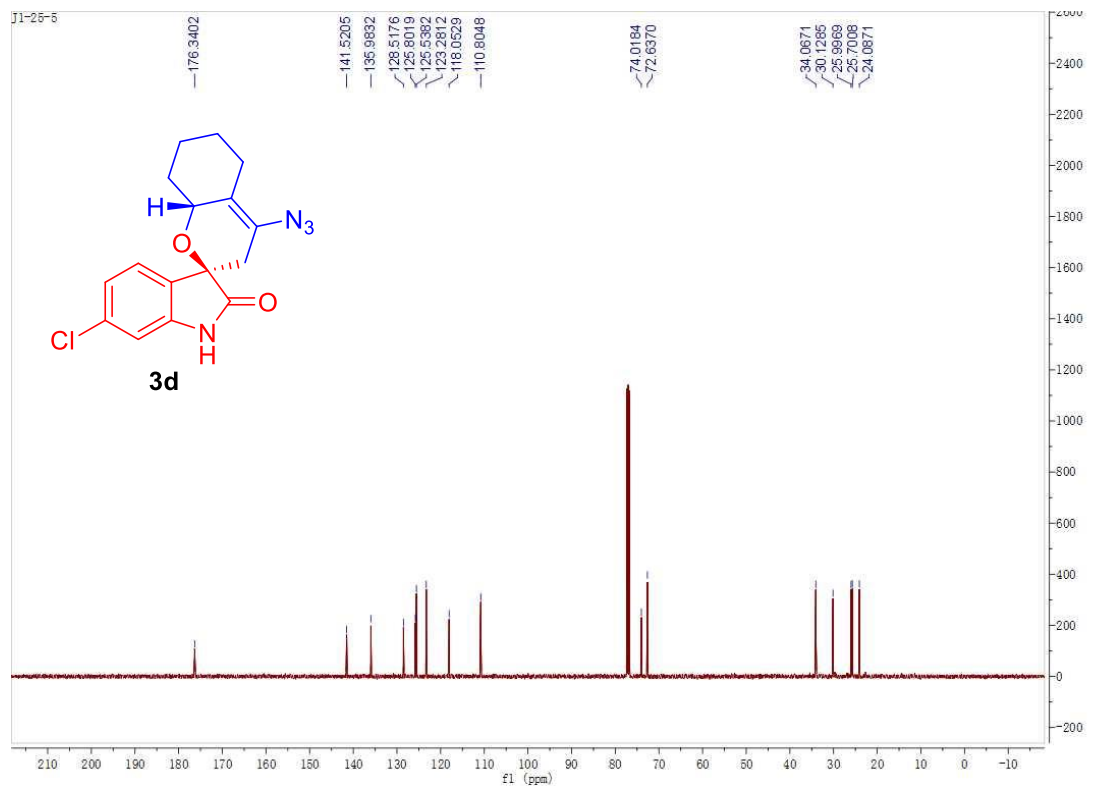

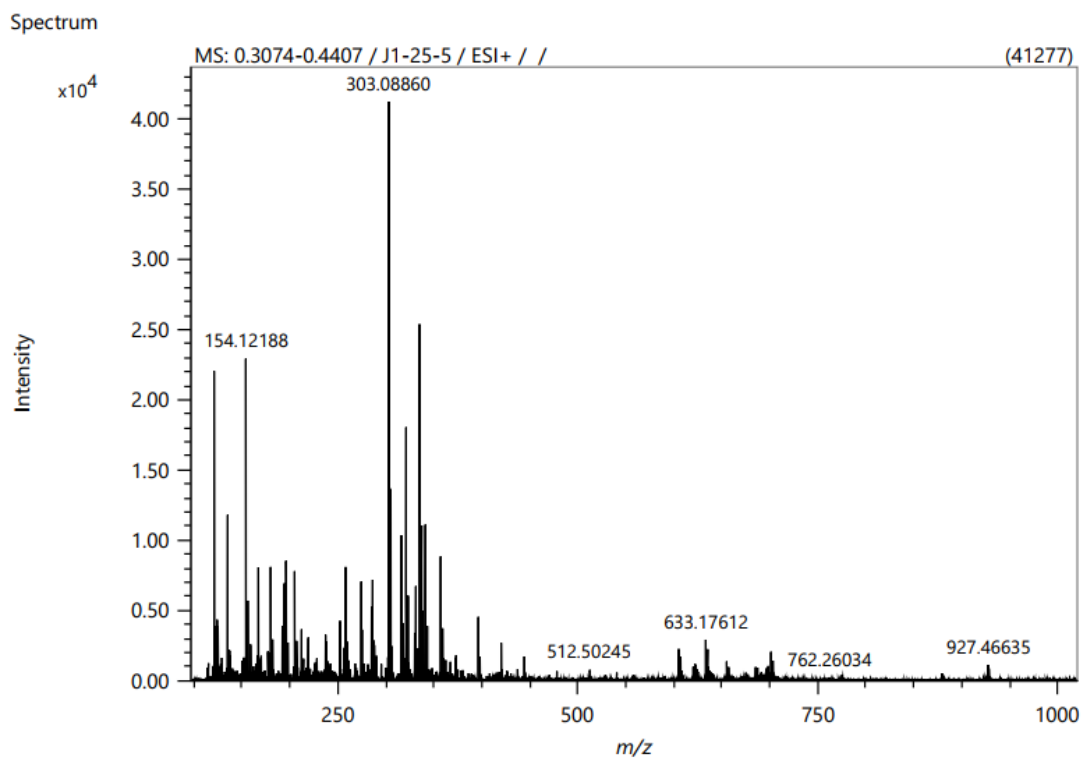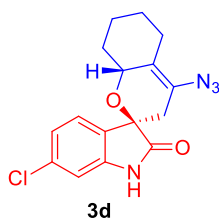

Exact Mass: 330.0884

Molecular Weight: 330.7720

$m/z$ : 330.0884 (100.0%), 332.0854 (32.0%), 331.0917 (17.3%), 333.0888 (5.5%), 331.0854 (1.5%), 332.0951 (1.4%)

Elemental Analysis: C, 58.10; H, 4.57; Cl, 10.72; N, 16.94; O, 9.67

HRMS (ESI,  $m/z$ ) calcd for  $C_{16}H_{15}ClN_4O_2$   $[M-N_2+H]^+$  303.08948, found 303.08860.

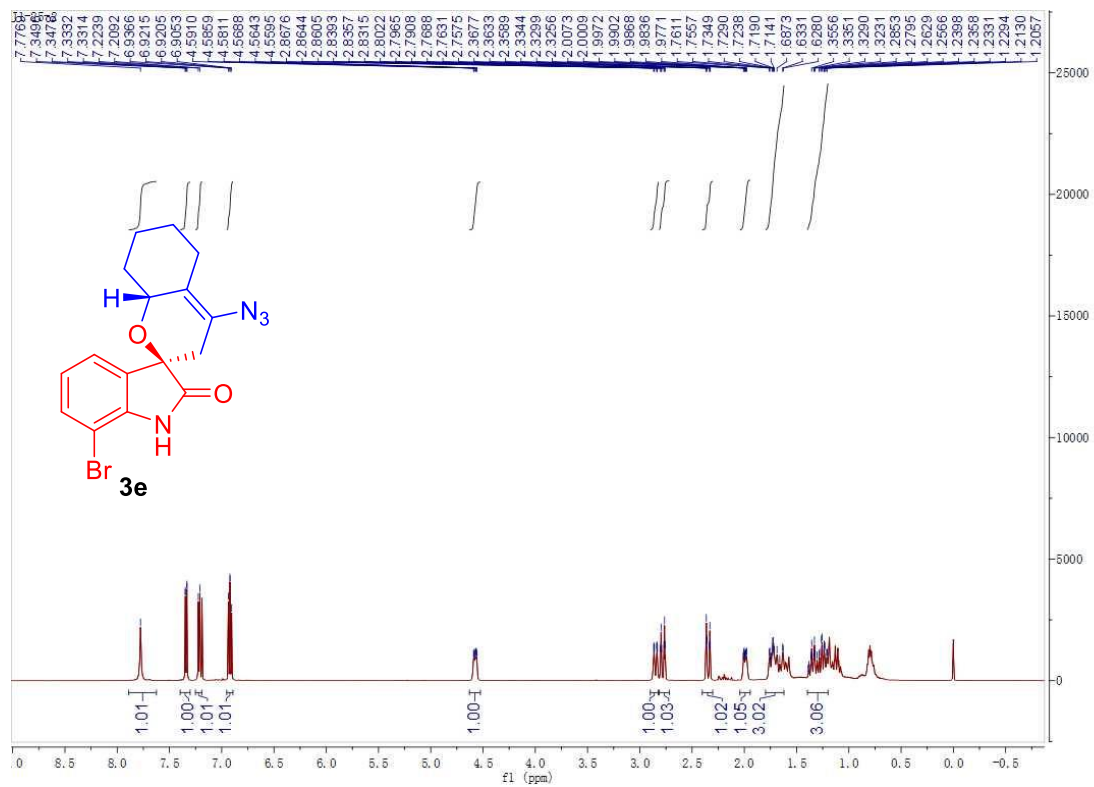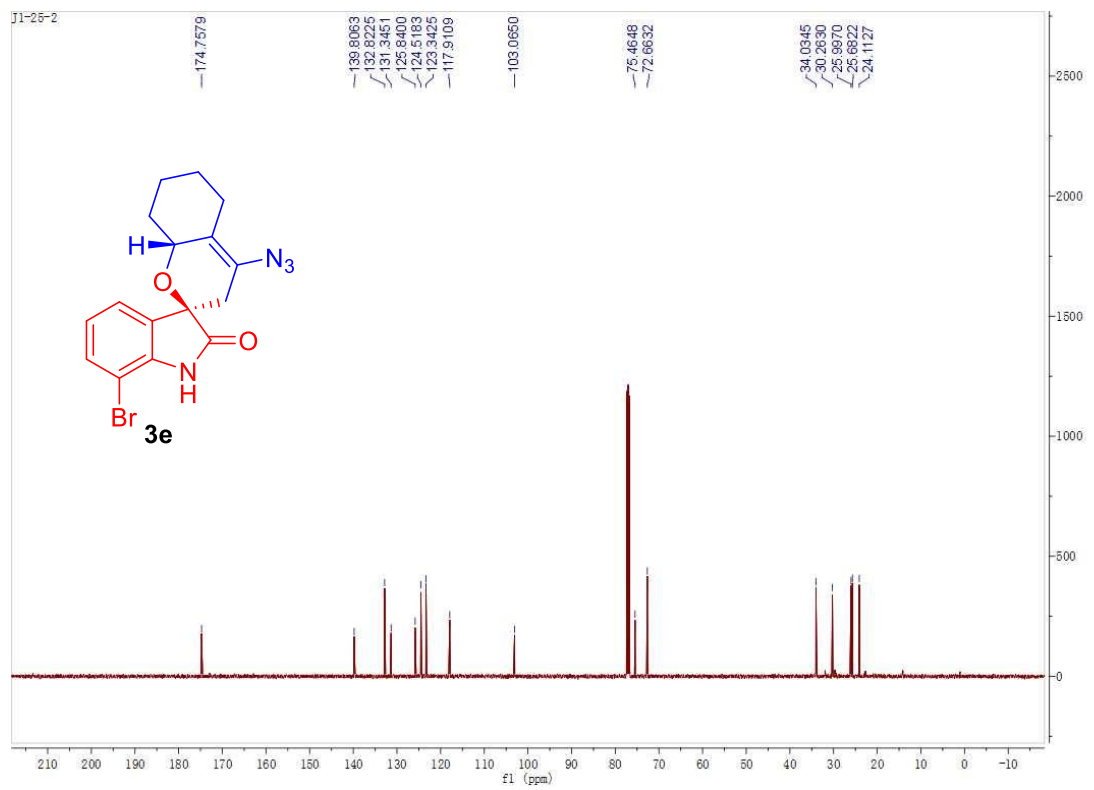

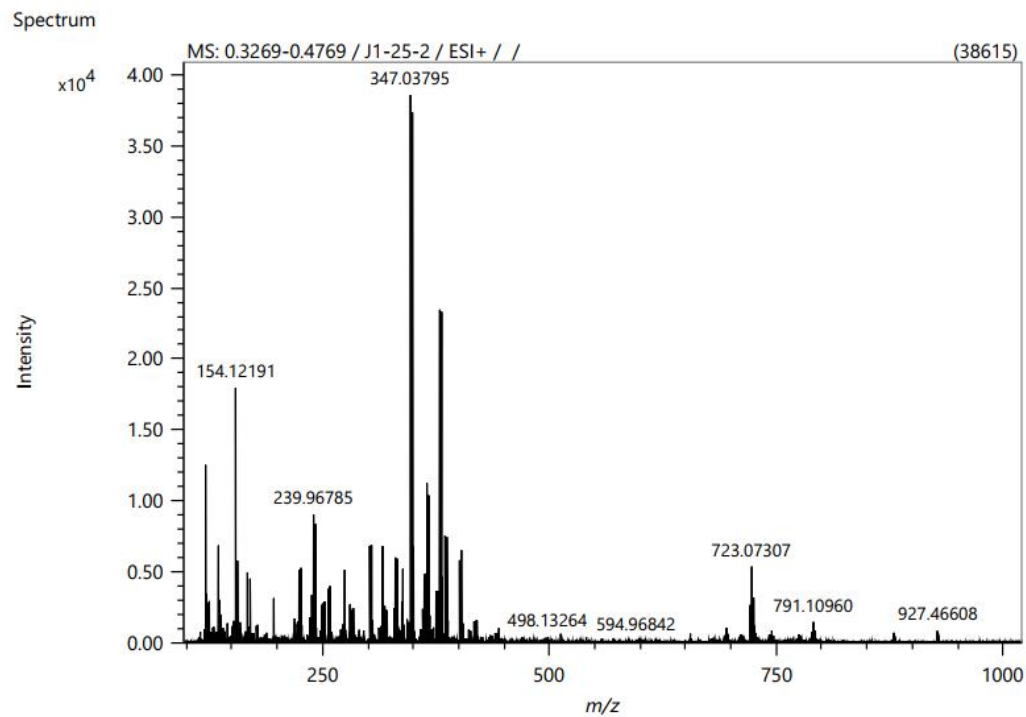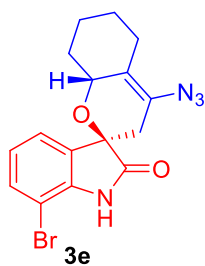

Exact Mass: 374.0378

Molecular Weight: 375.2260

m/z: 374.0378 (100.0%), 376.0358 (97.3%), 377.0391 (16.8%), 375.0412 (16.2%), 375.0349 (1.5%), 377.0328 (1.4%), 378.0425 (1.2%), 375.0412 (1.1%), 376.0445 (1.1%)

Elemental Analysis: C, 51.22; H, 4.03; Br, 21.29; N, 14.93; O, 8.53

HRMS (ESI, m/z) calcd for  $C_{16}H_{15}BrN_4O_2$   $[M-N_2+H]^+$  347.03897, found 347.03795.

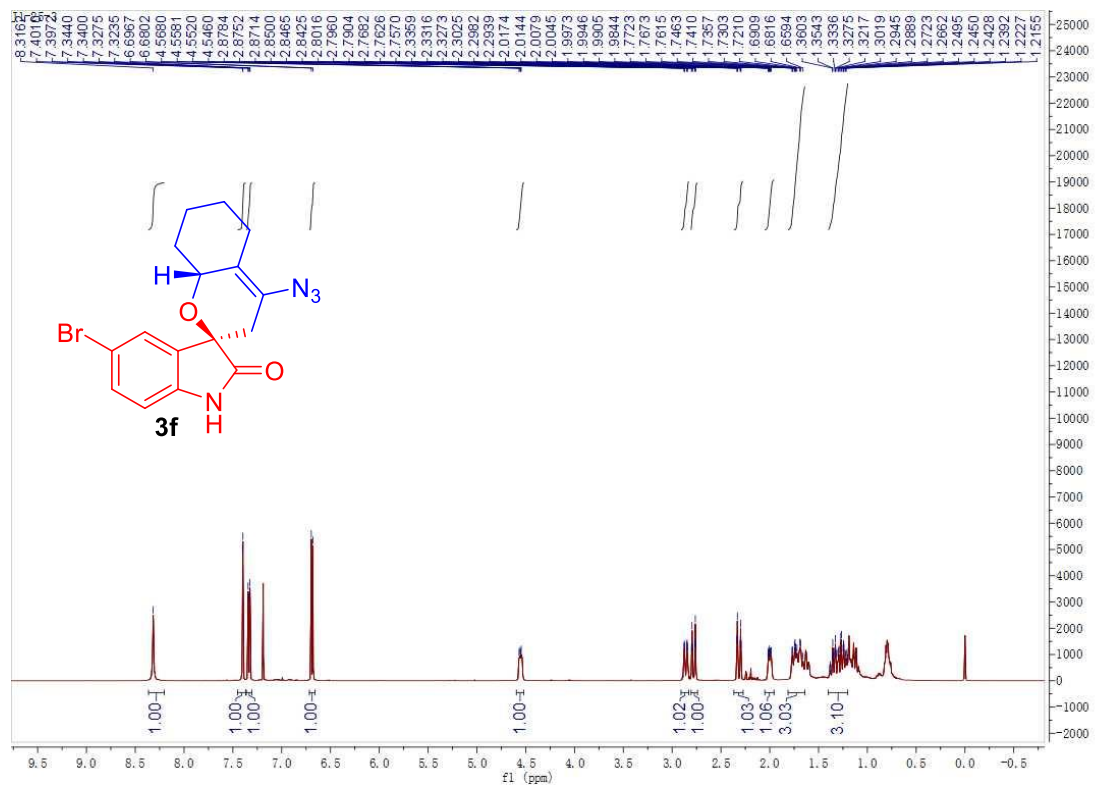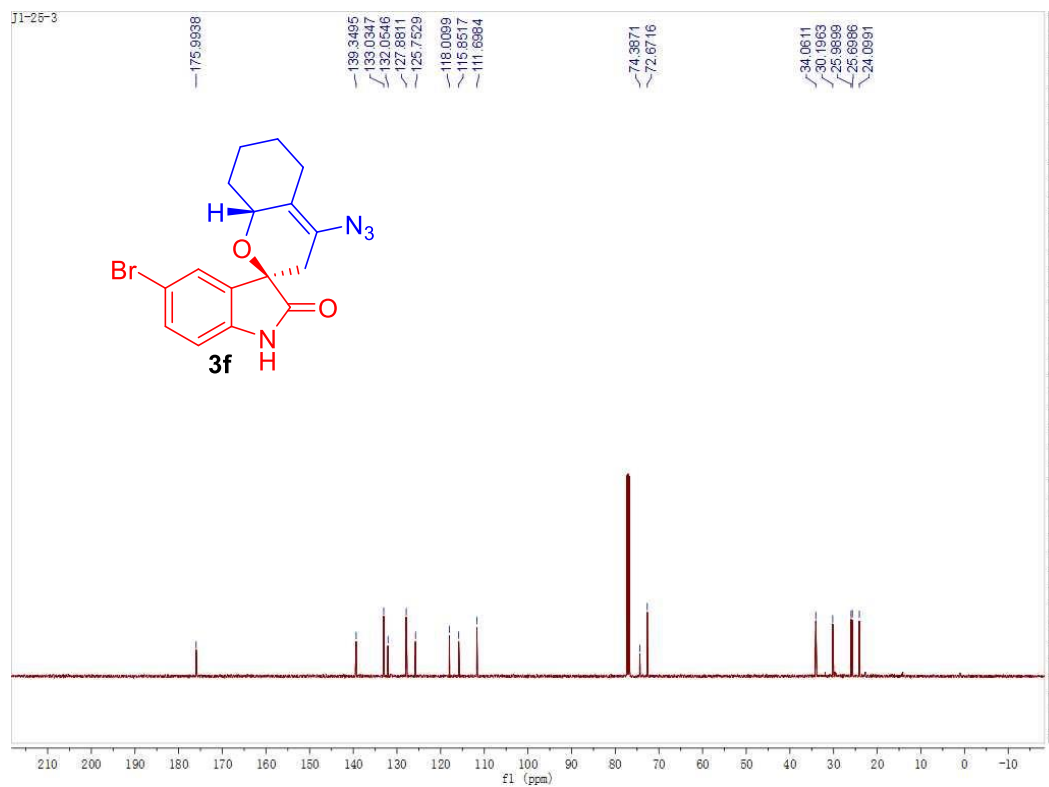

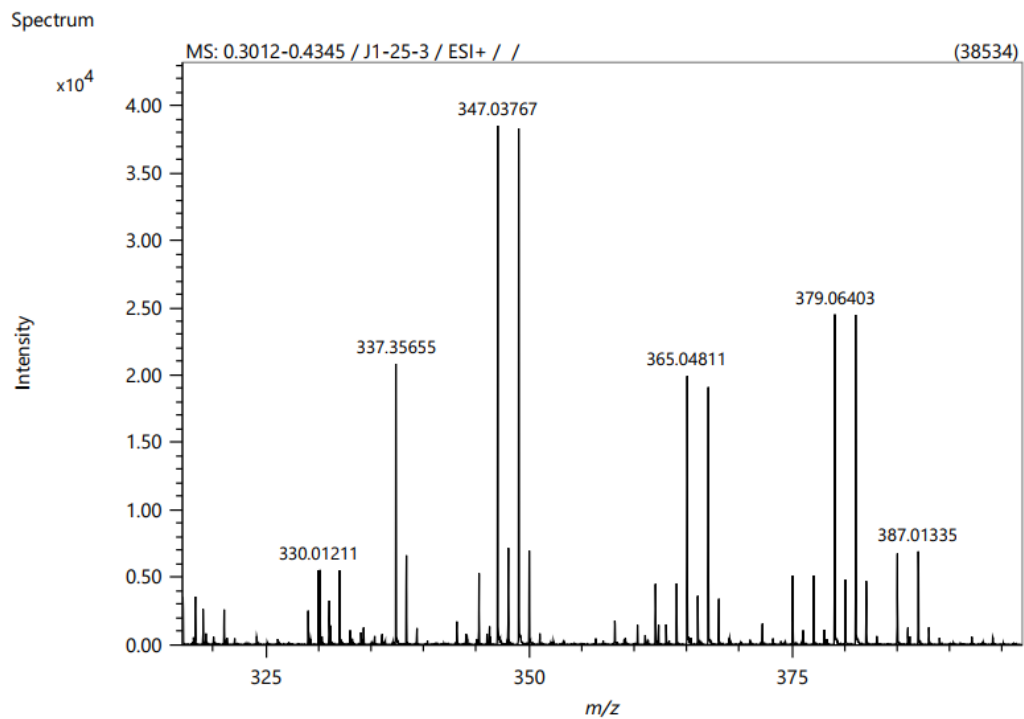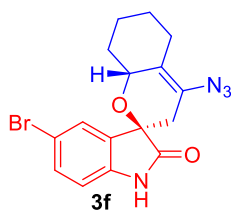

Exact Mass: 374.0378

Molecular Weight: 375.2260

$m/z$ : 374.0378 (100.0%), 376.0358 (97.3%), 377.0391 (16.8%), 375.0412 (16.2%), 375.0349 (1.5%), 377.0328 (1.4%), 378.0425 (1.2%), 375.0412 (1.1%), 376.0445 (1.1%)

Elemental Analysis: C, 51.22; H, 4.03; Br, 21.29; N, 14.93; O, 8.53

HRMS (ESI,  $m/z$ ) calcd for  $C_{16}H_{15}BrN_4O_2 [M-N_2+H]^+$  347.03897, found 347.03767.

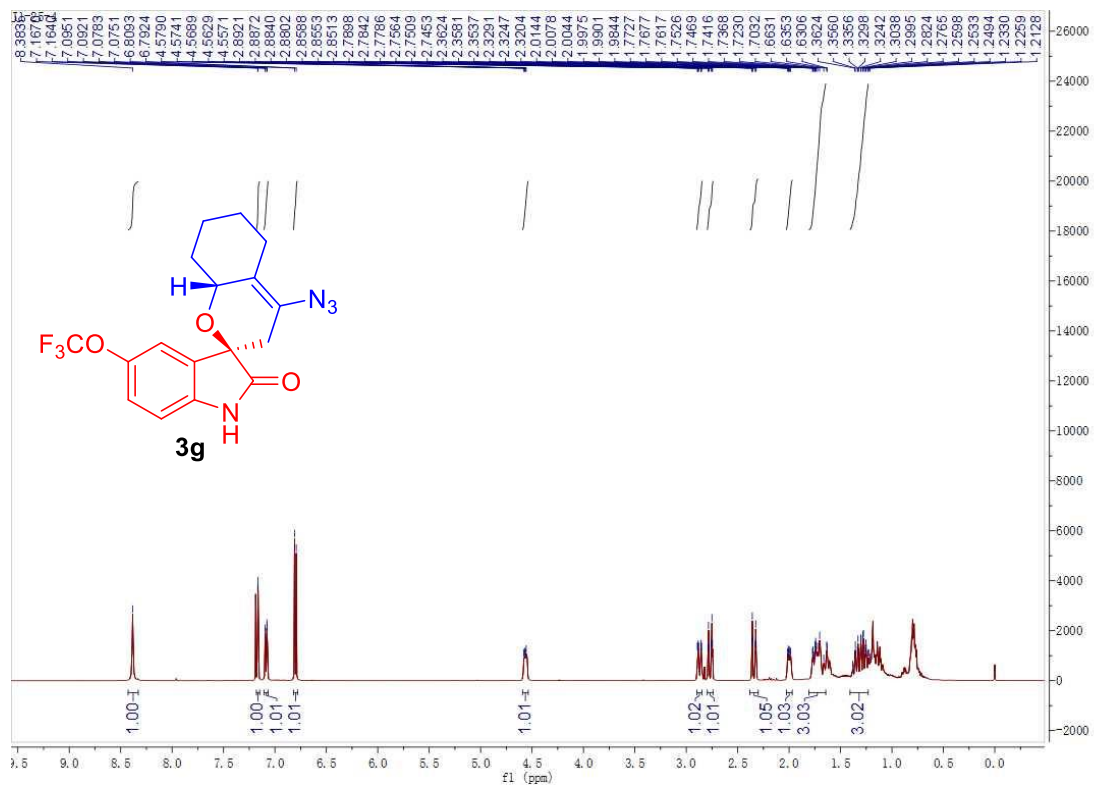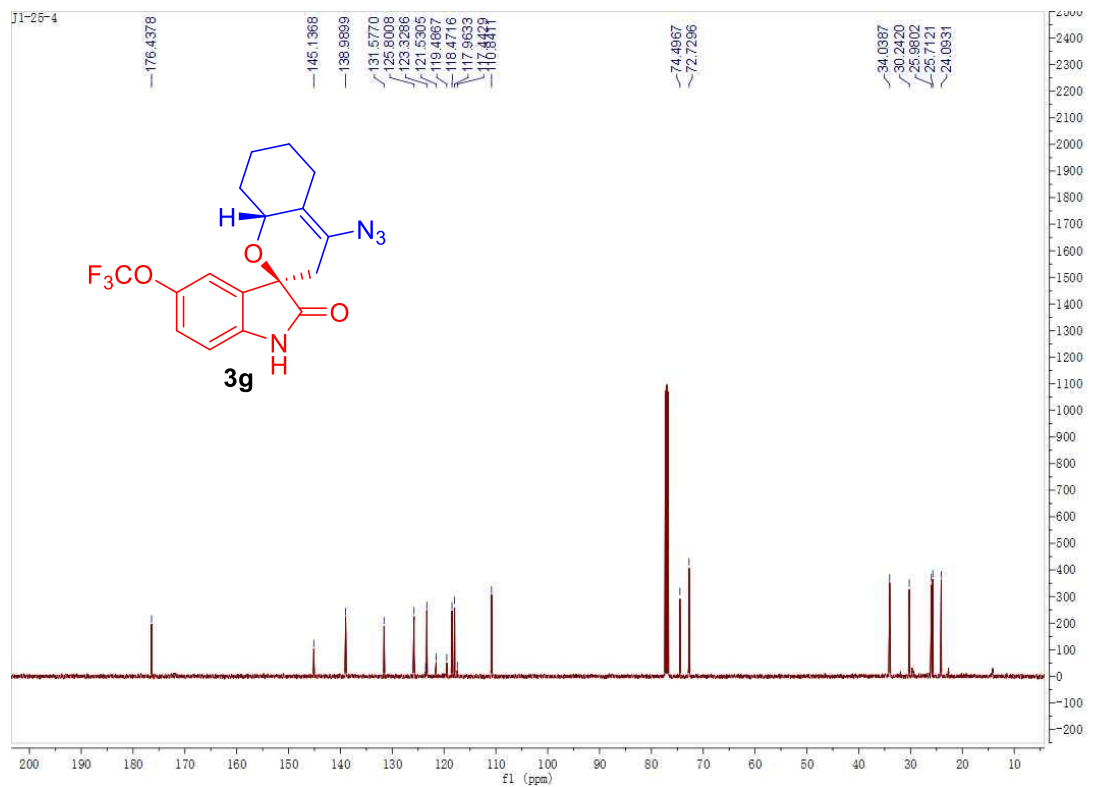



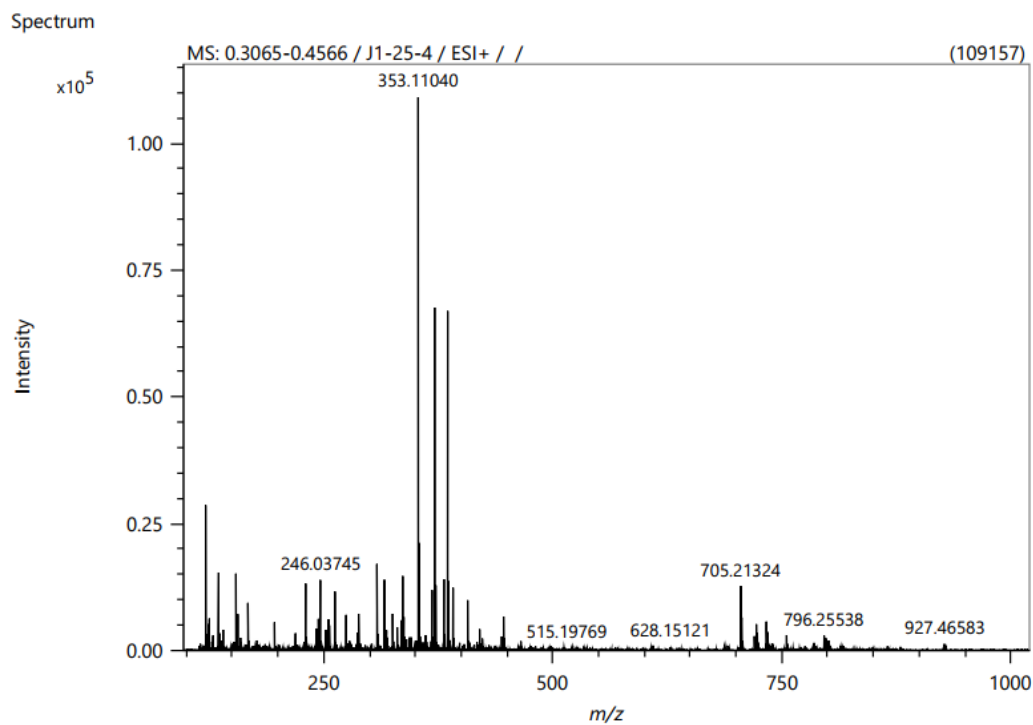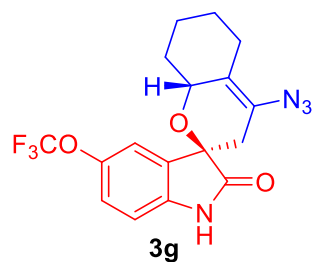

Exact Mass: 380.1096

Molecular Weight: 380.3272

m/z: 380.1096 (100.0%), 381.1130 (18.4%), 382.1163 (1.6%), 381.1067 (1.5%)

Elemental Analysis: C, 53.69; H, 3.98; F, 14.99; N, 14.73; O, 12.62

HRMS (ESI, m/z) calcd for  $C_{17}H_{15}F_3N_4O_3$   $[M-N_2+H]^+$  353.11075, found 353.11040.

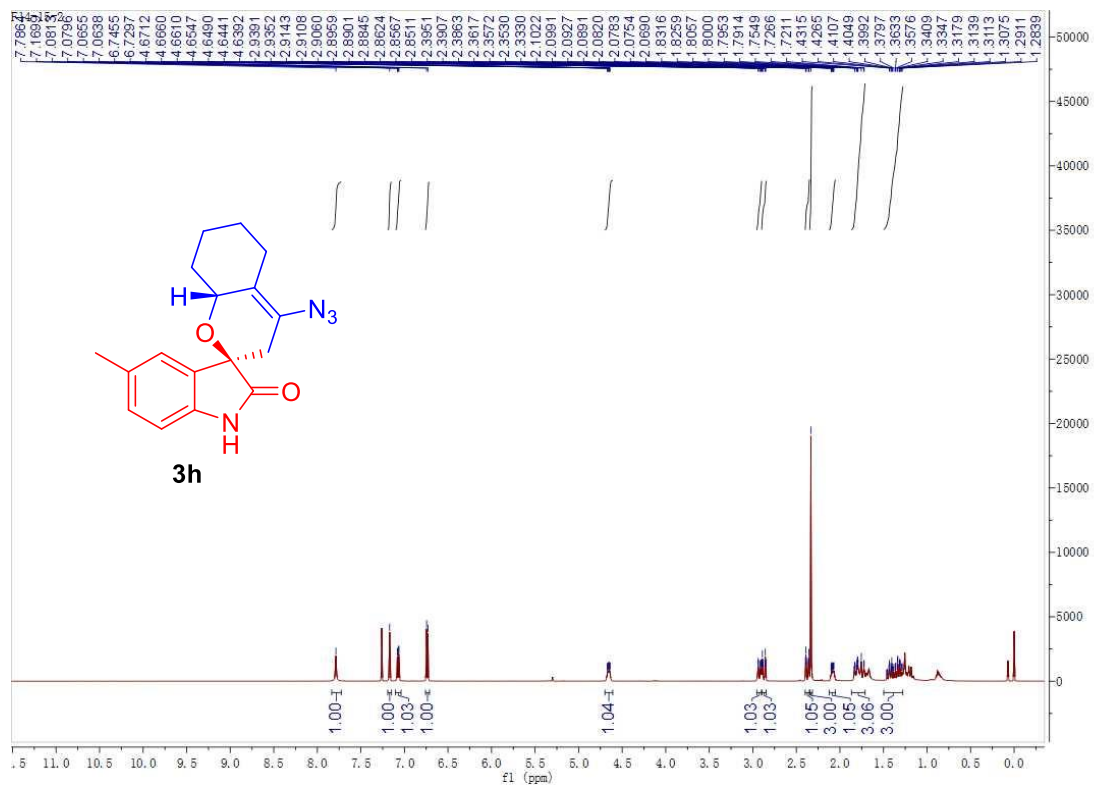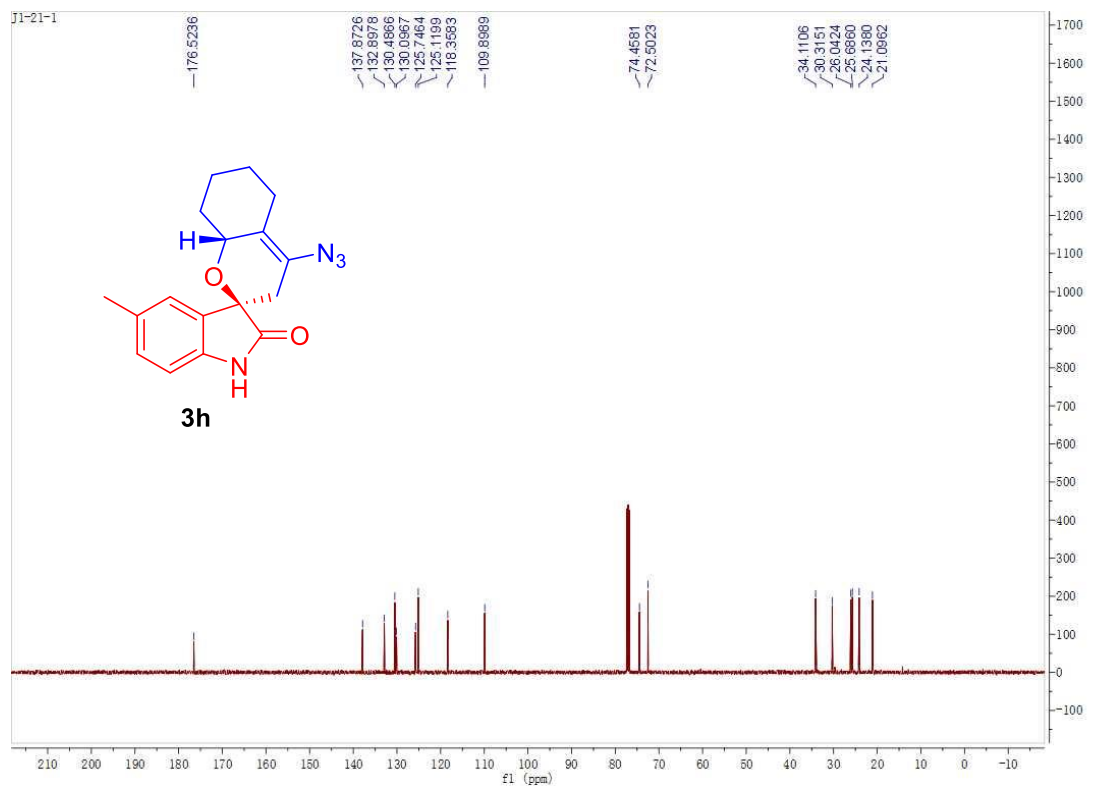

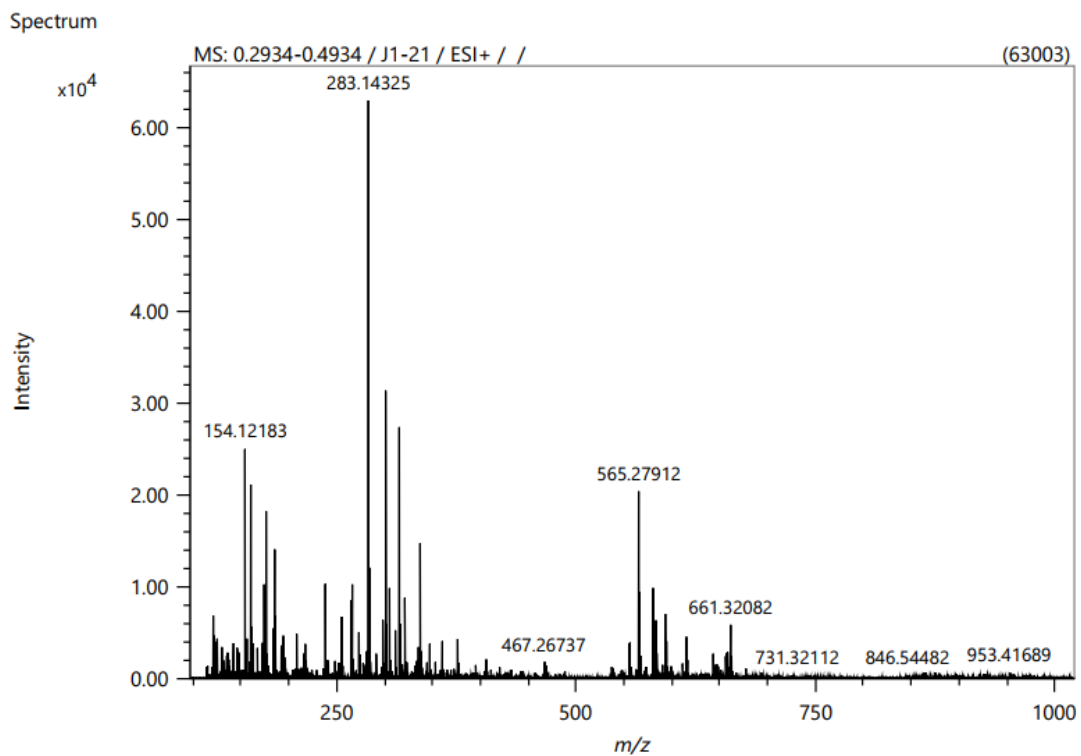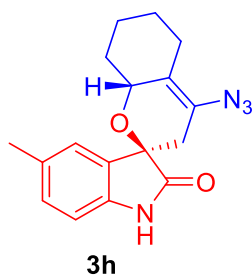

Exact Mass: 310.1430

Molecular Weight: 310.3570

m/z: 310.1430 (100.0%), 311.1463 (18.4%), 312.1497 (1.6%), 311.1400 (1.5%)

Elemental Analysis: C, 65.79; H, 5.85; N, 18.05; O, 10.31

HRMS (ESI, m/z) calcd for  $C_{17}H_{18}N_4O_2 [M-N_2+H]^+$  283.14410, found 283.14325.

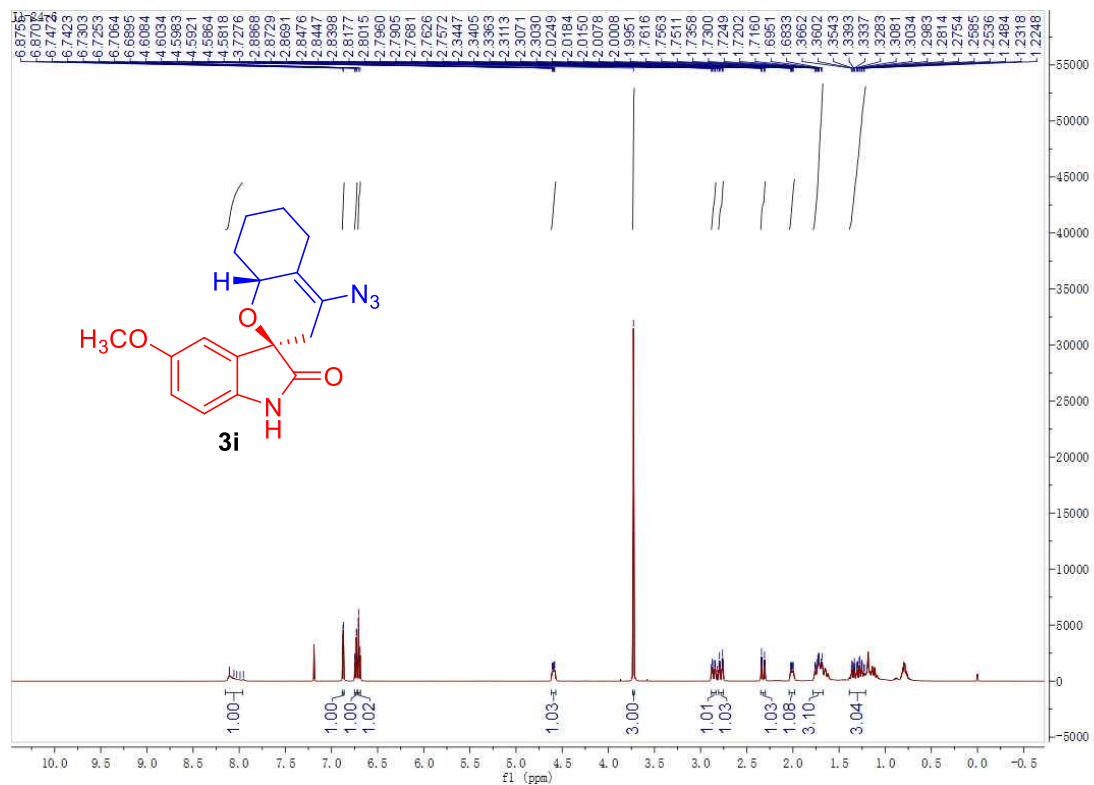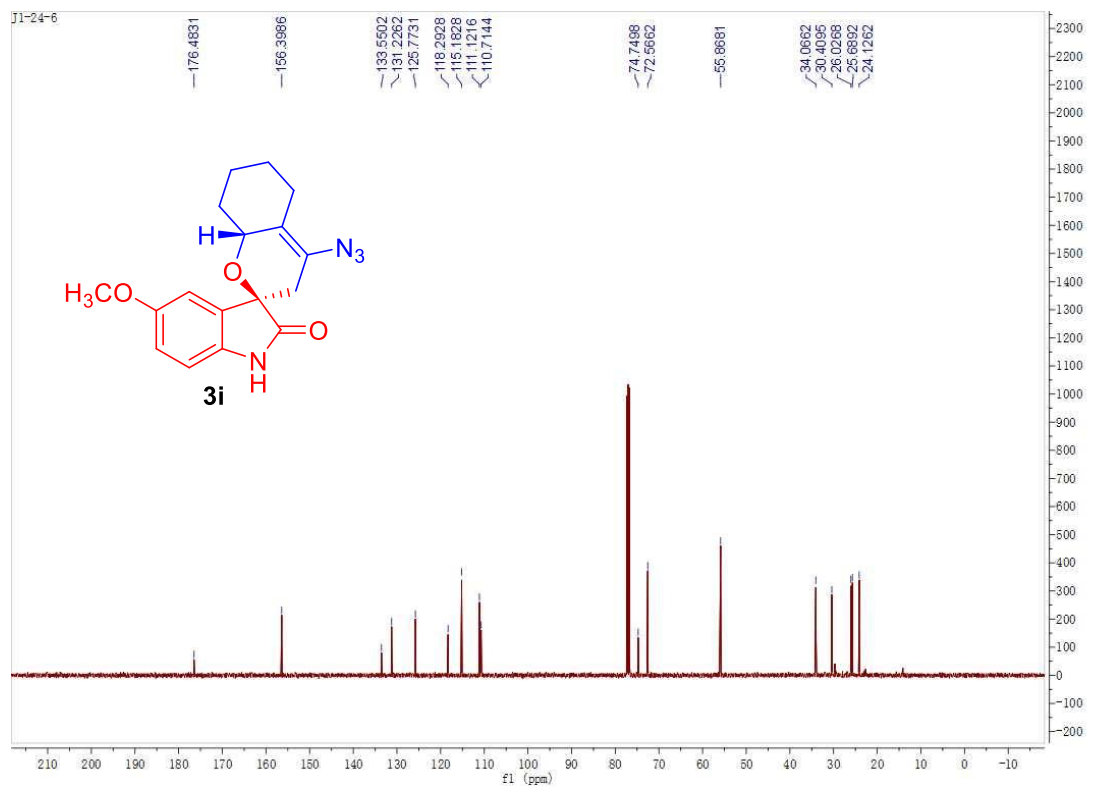

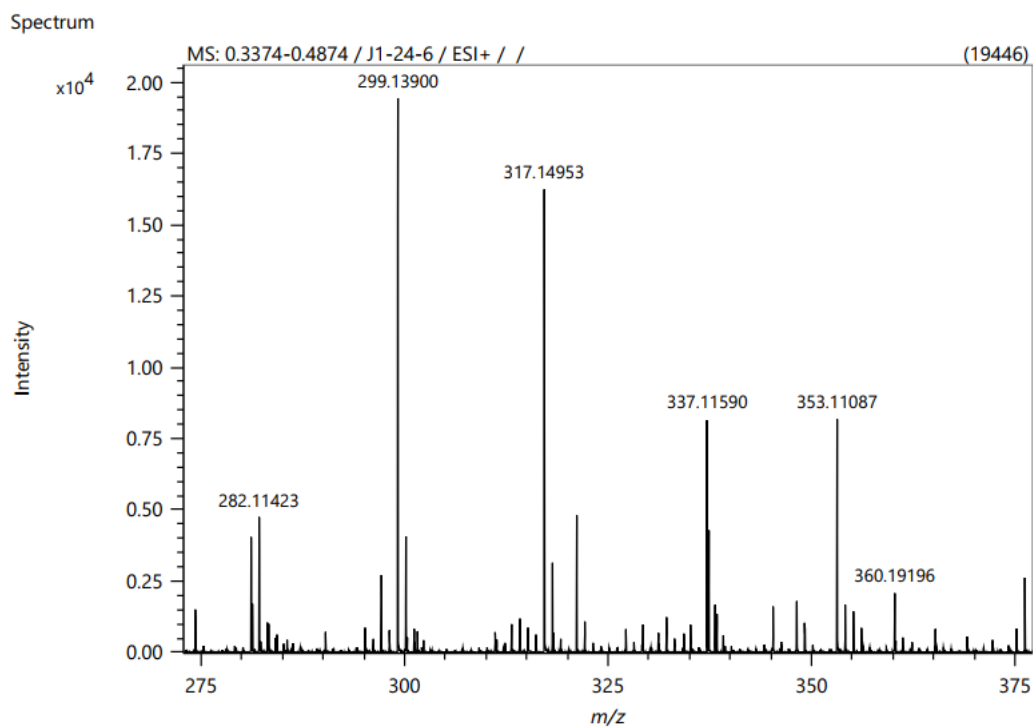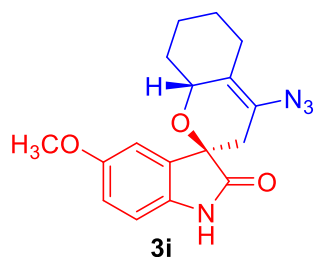

Exact Mass: 326.1379

Molecular Weight: 326.3560

m/z: 326.1379 (100.0%), 327.1412 (18.4%), 328.1446 (1.6%), 327.1349 (1.5%)

Elemental Analysis: C, 62.57; H, 5.56; N, 17.17; O, 14.71

HRMS (ESI, m/z) calcd for  $C_{17}H_{18}N_4O_3 [M-N_2+H]^+$  299.13902, found 299.13900.

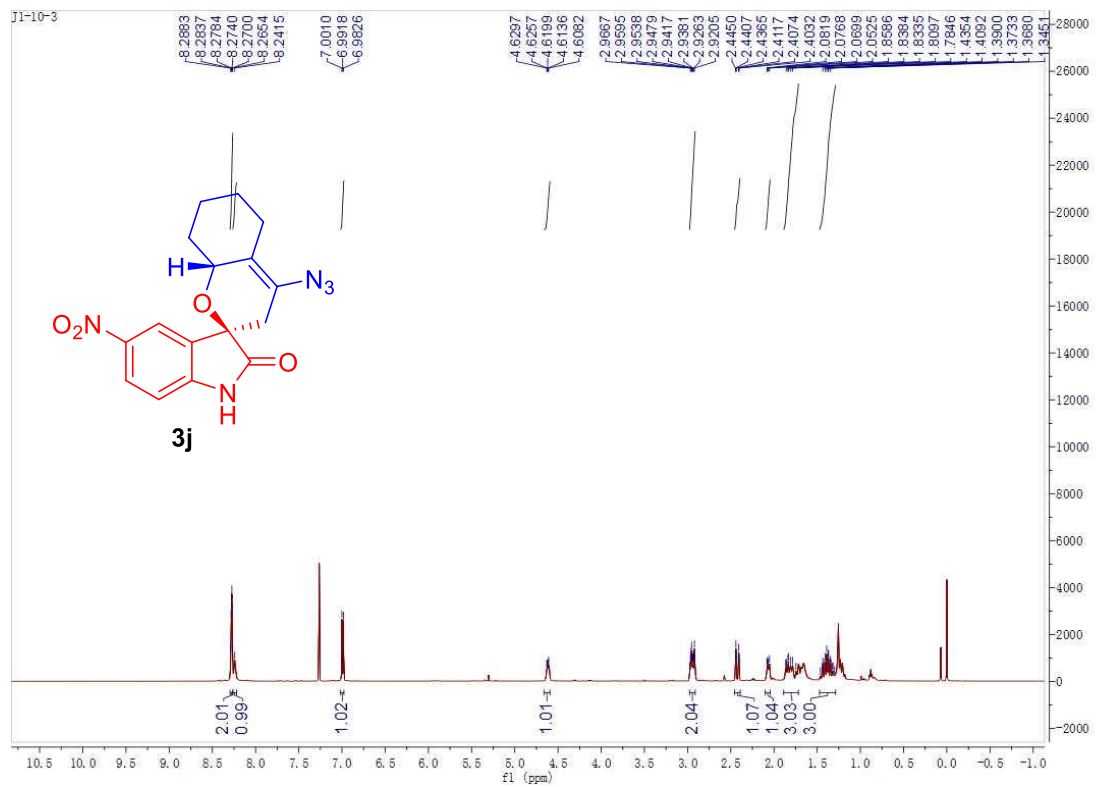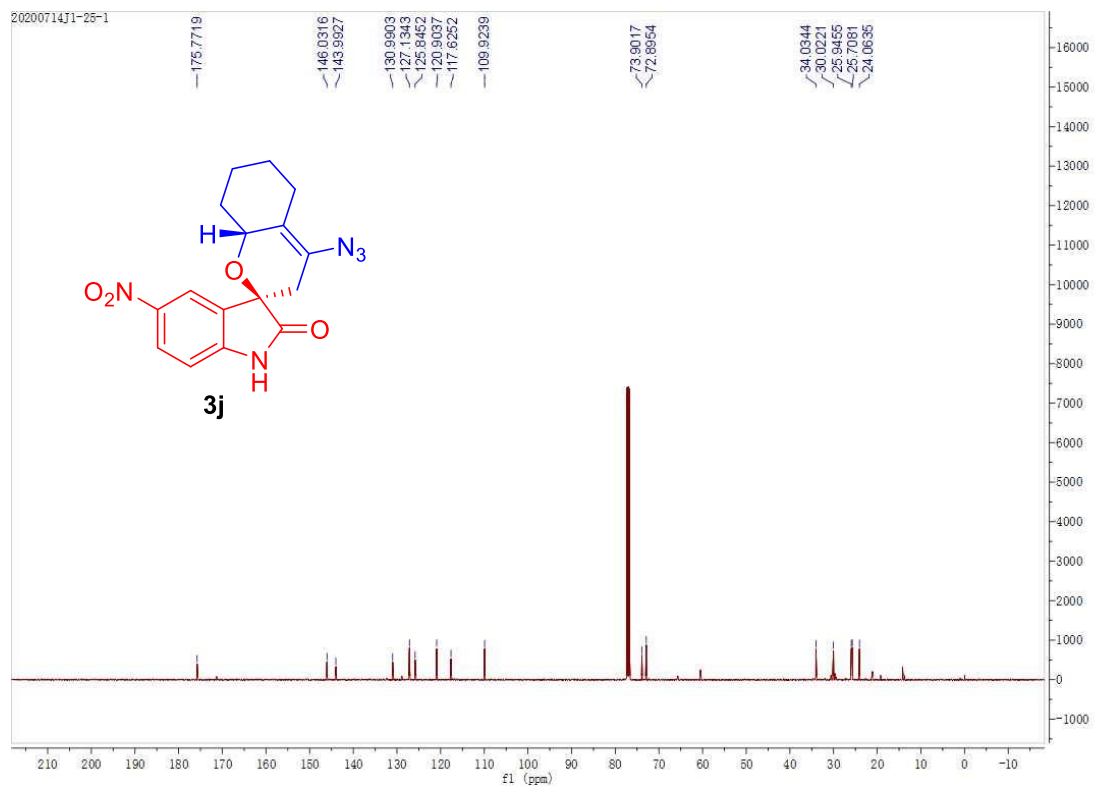

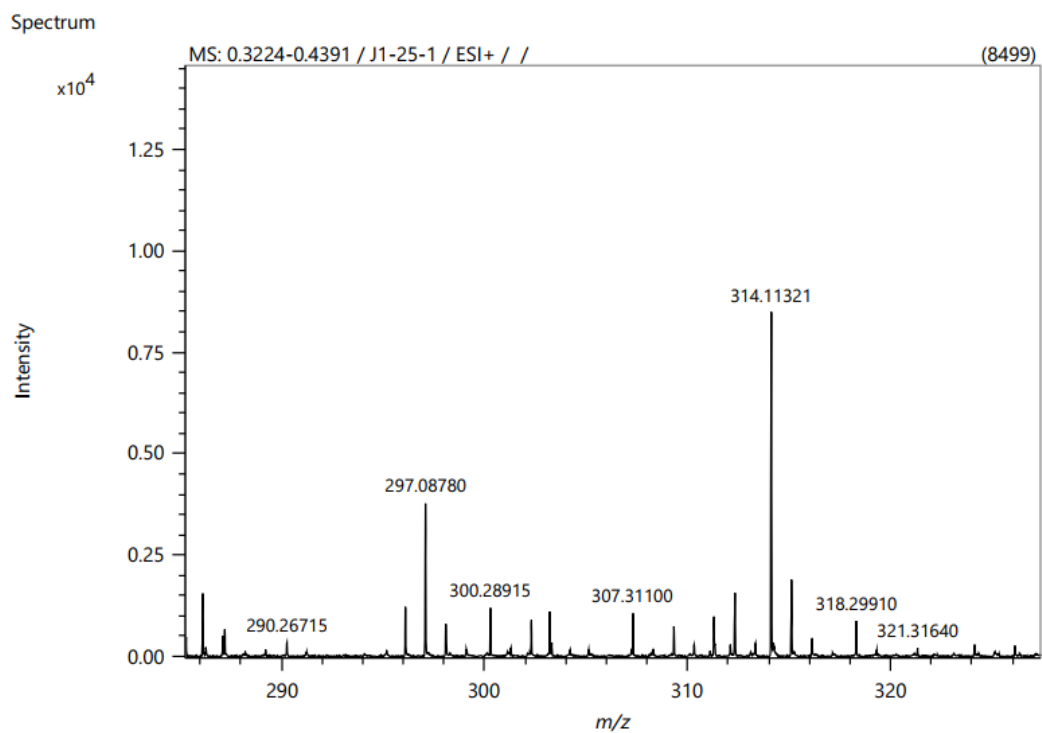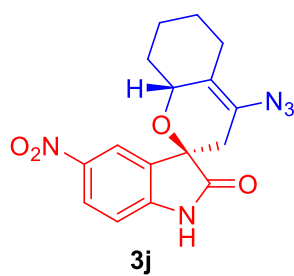

Exact Mass: 341.1124

Molecular Weight: 341.3270

m/z: 341.1124 (100.0%), 342.1158 (17.3%), 342.1094 (1.8%), 343.1191 (1.4%)

Elemental Analysis: C, 56.30; H, 4.43; N, 20.52; O, 18.75

HRMS (ESI, m/z) calcd for  $C_{16}H_{15}N_5O_4$   $[M-N_2+H]^+$  314.11353, found 314.11321.

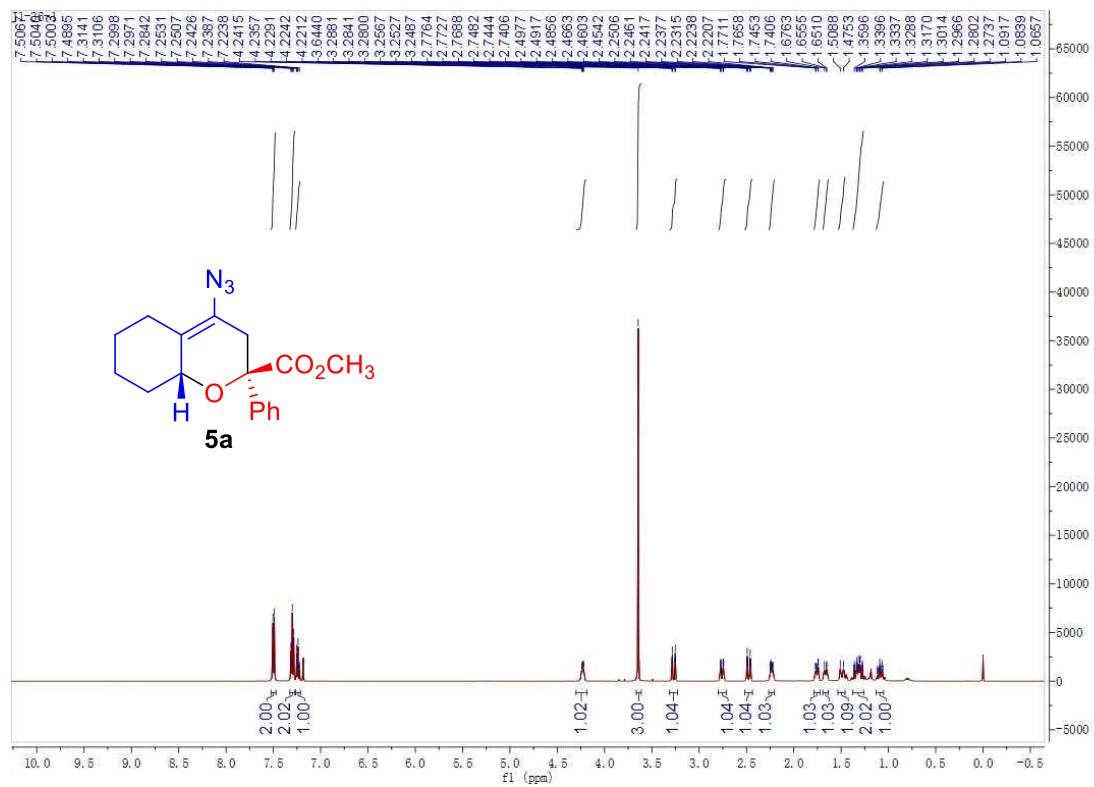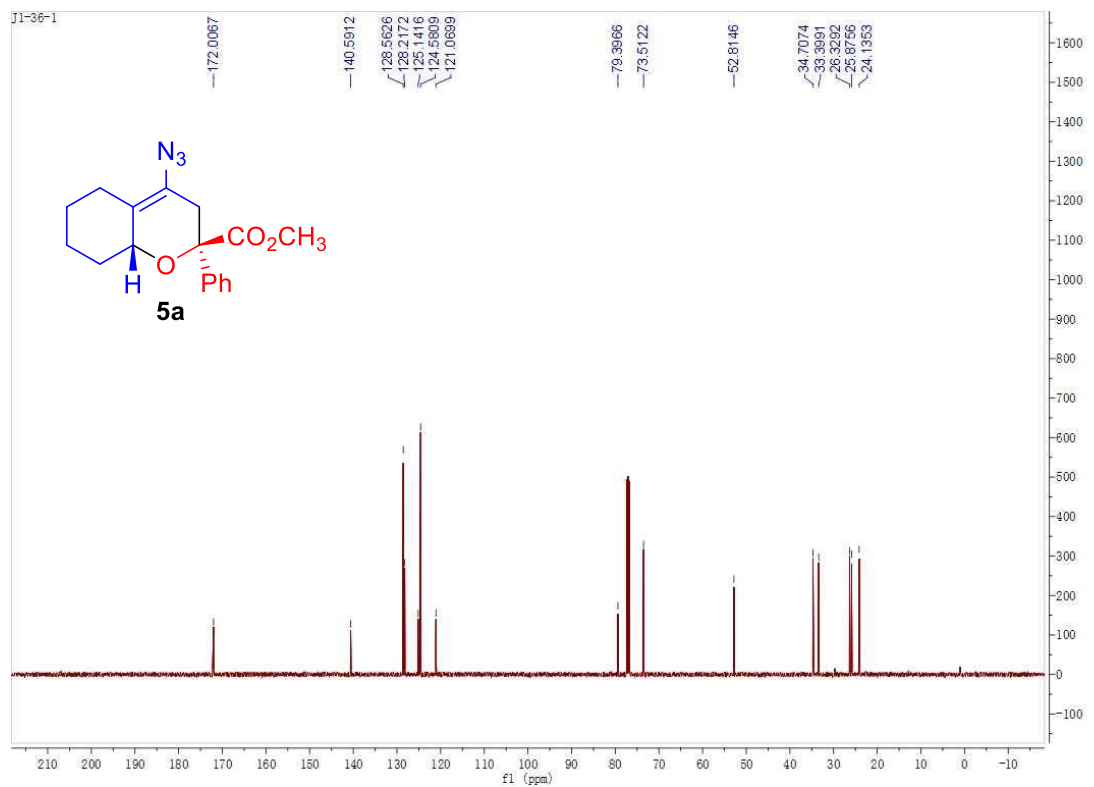



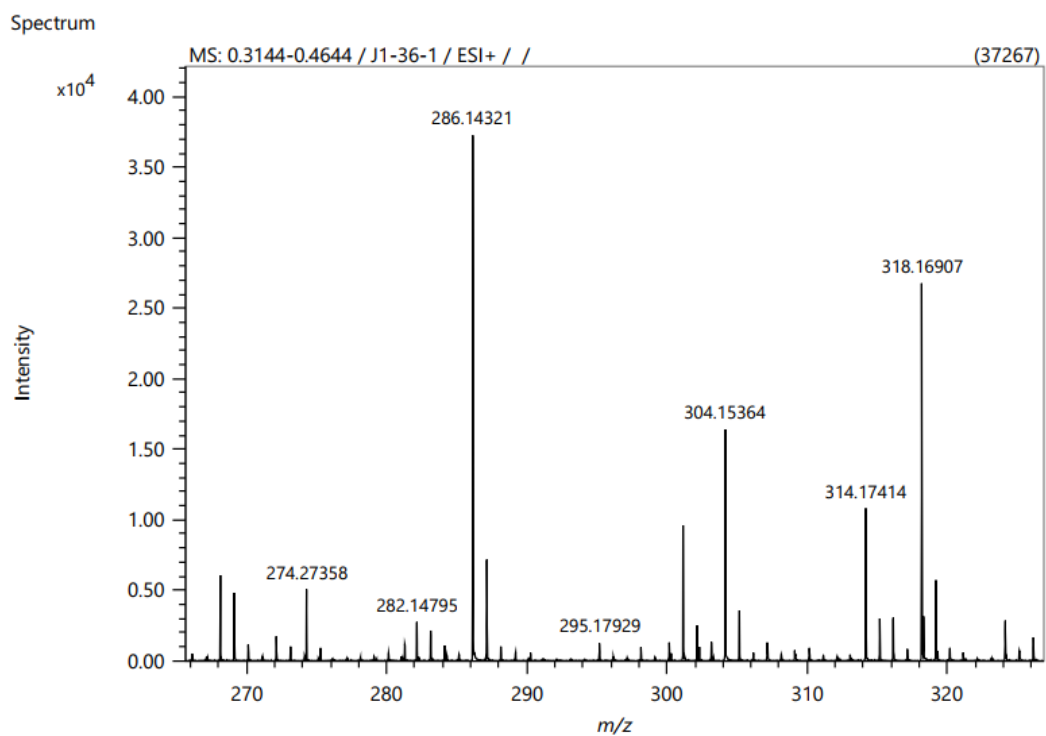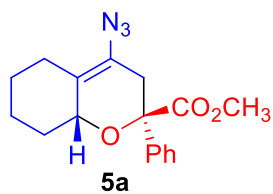

Exact Mass: 313.1426

Molecular Weight: 313.3570

$m/z$ : 313.1426 (100.0%), 314.1460 (18.4%), 315.1494 (1.6%), 314.1397 (1.1%)

Elemental Analysis: C, 65.16; H, 6.11; N, 13.41; O, 15.32

HRMS (ESI,  $m/z$ ) calcd for  $C_{17}H_{19}N_3O_3$   $[M-N_2+H]^+$  286.14377, found 286.14321.

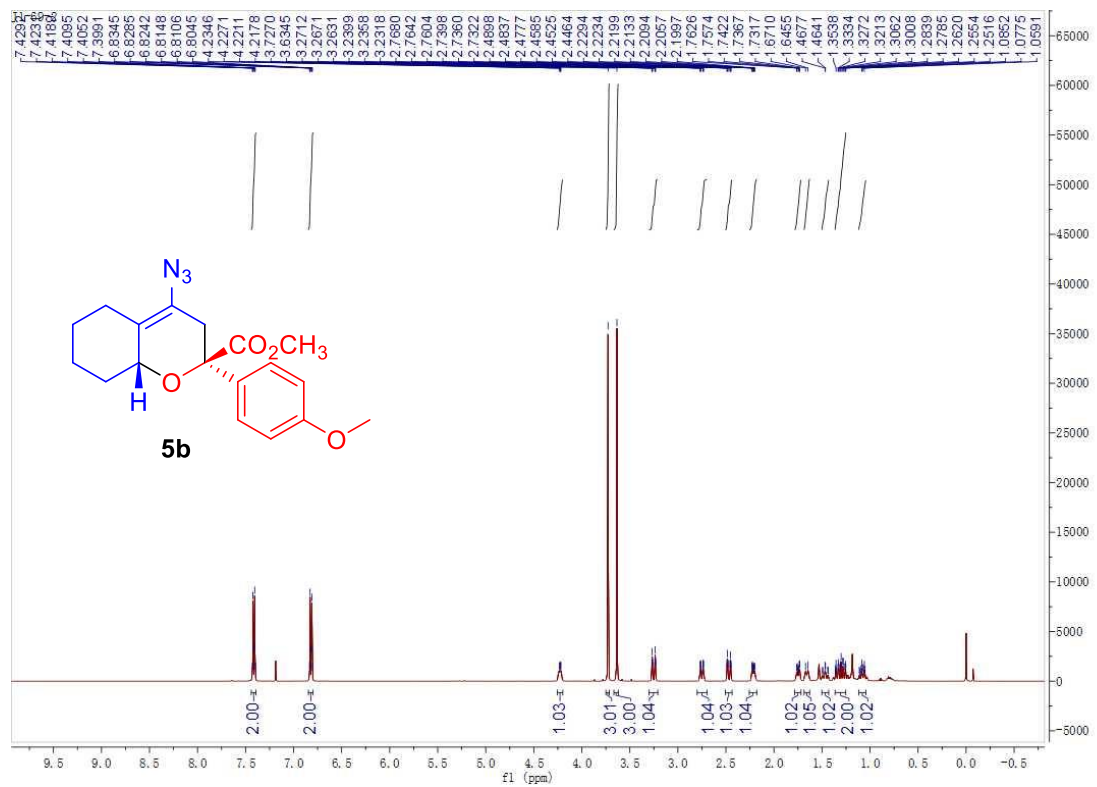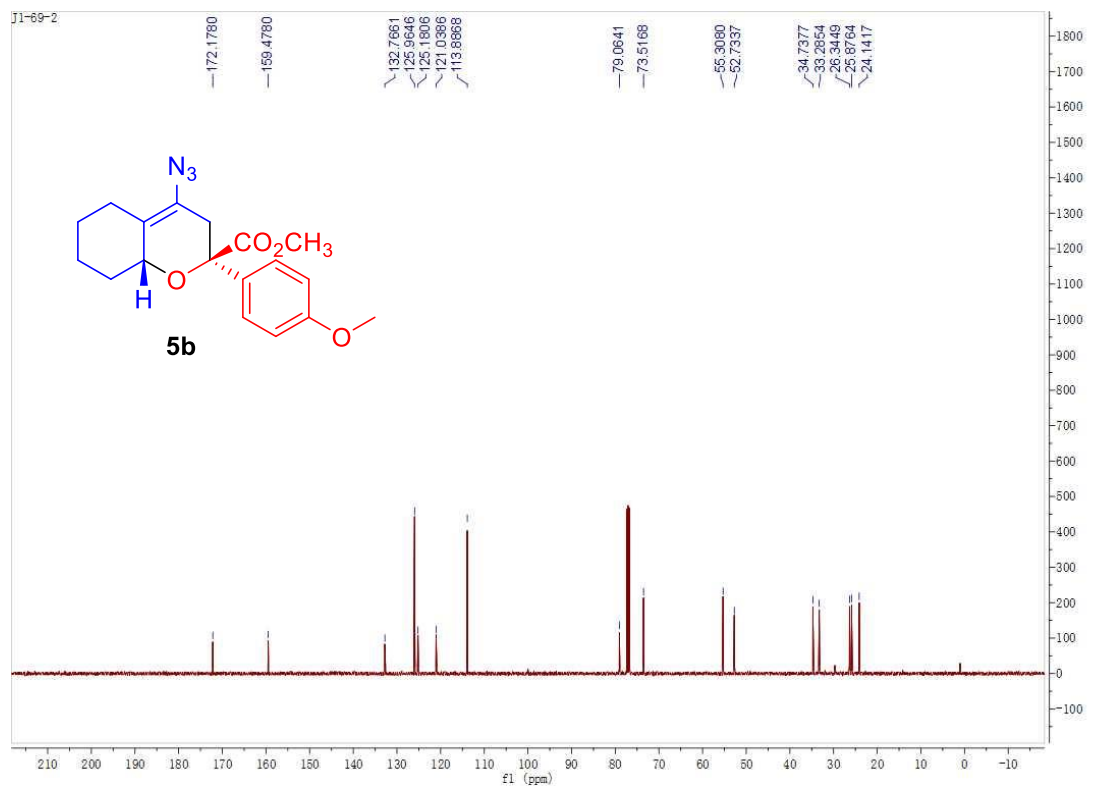

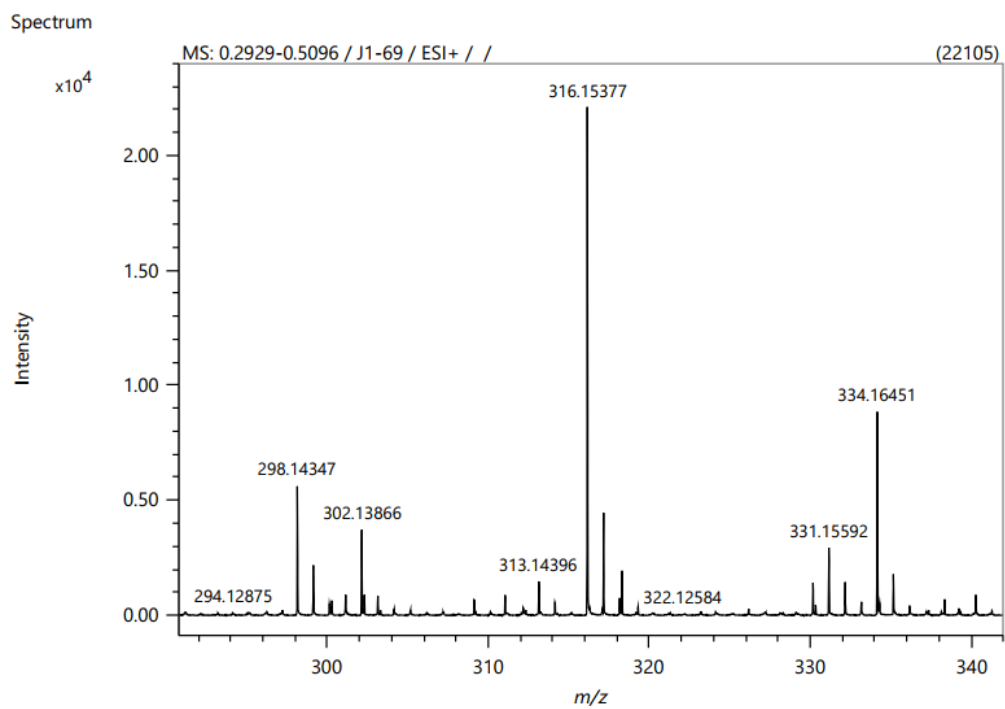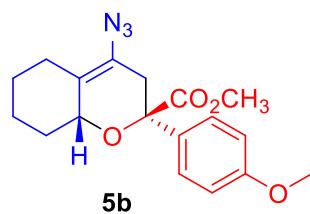

Exact Mass: 343.1532

Molecular Weight: 343.3830

m/z: 343.1532 (100.0%), 344.1566 (19.5%), 345.1599 (1.8%), 344.1502 (1.1%)

Elemental Analysis: C, 62.96; H, 6.16; N, 12.24; O, 18.64

HRMS (ESI, m/z) calcd for  $C_{18}H_{21}N_3O_4$   $[M-N_2+H]^+$  316.15433, found 316.15377.

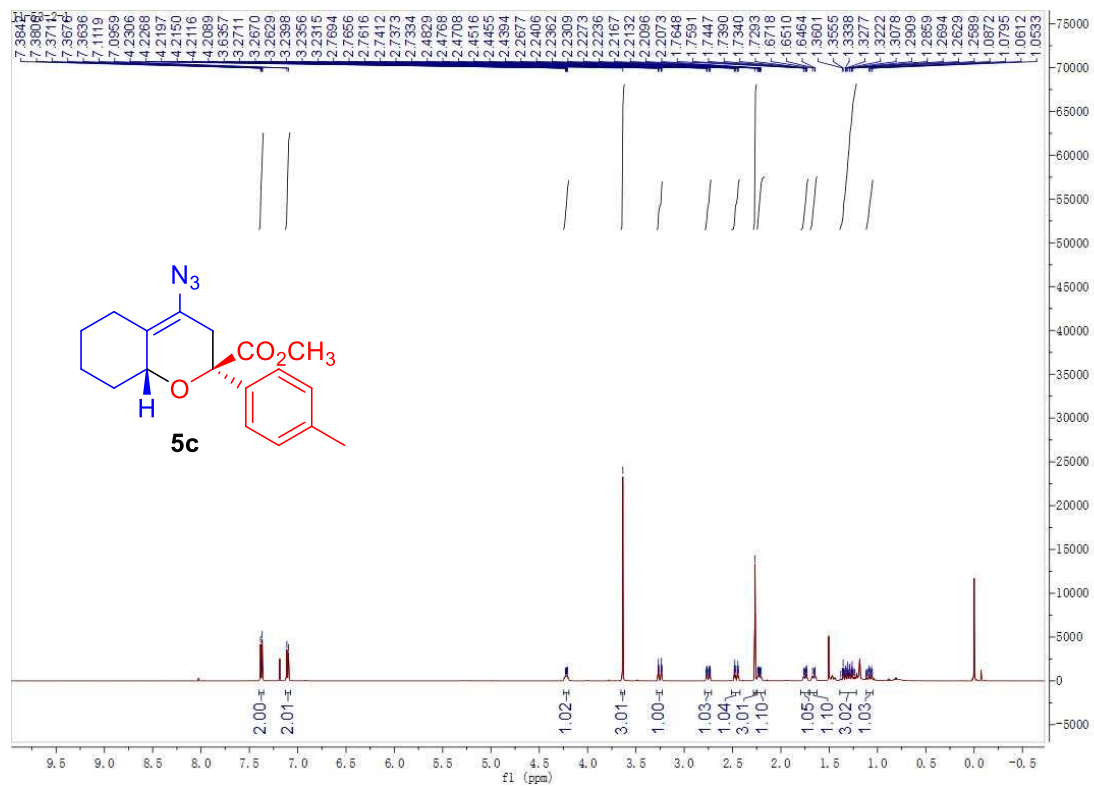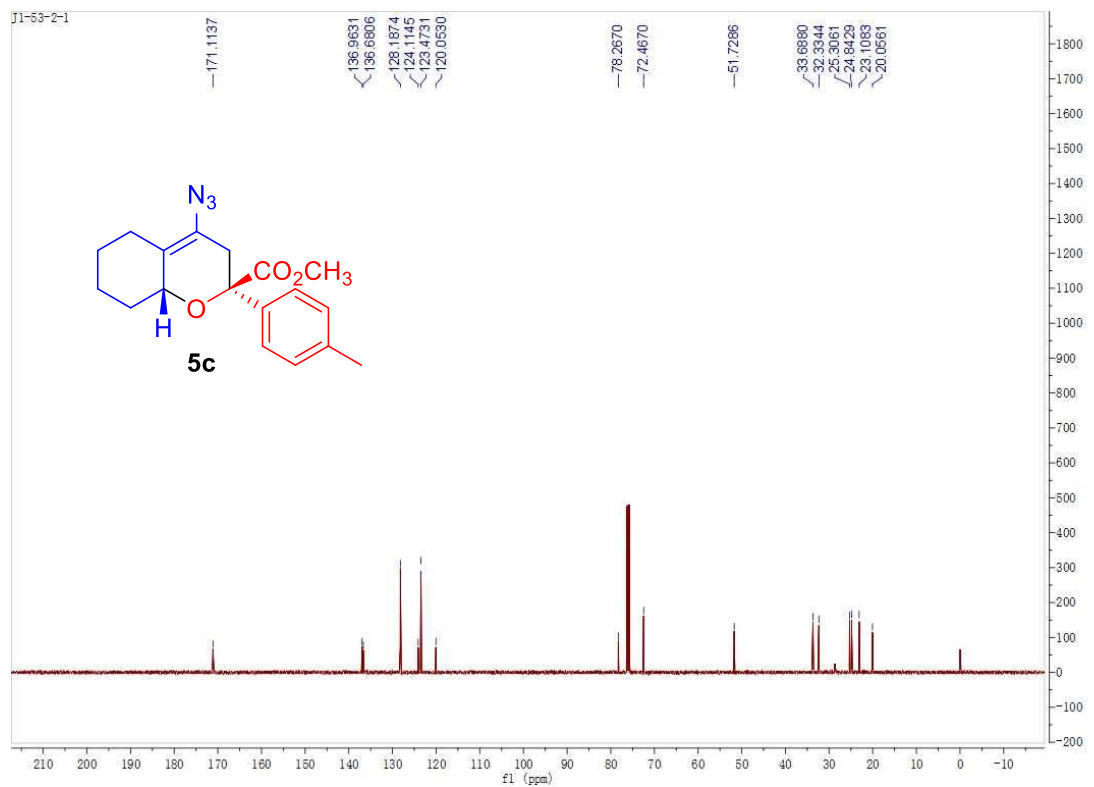

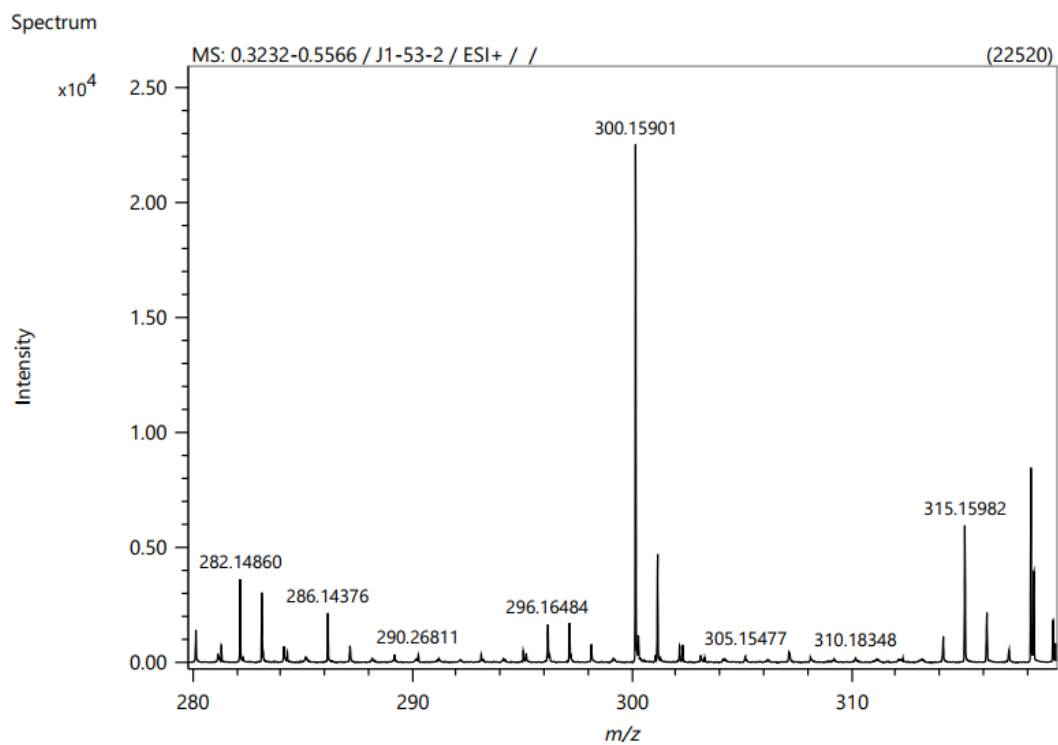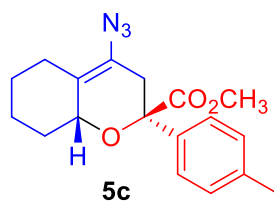

Exact Mass: 327.1583

Molecular Weight: 327.3840

$m/z$ : 327.1583 (100.0%), 328.1616 (19.5%), 329.1650 (1.8%), 328.1553 (1.1%)

Elemental Analysis: C, 66.04; H, 6.47; N, 12.84; O, 14.66

HRMS (ESI,  $m/z$ ) calcd for  $C_{18}H_{21}N_3O_3$   $[M-N_2+H]^+$  300.15942, found 300.15901.

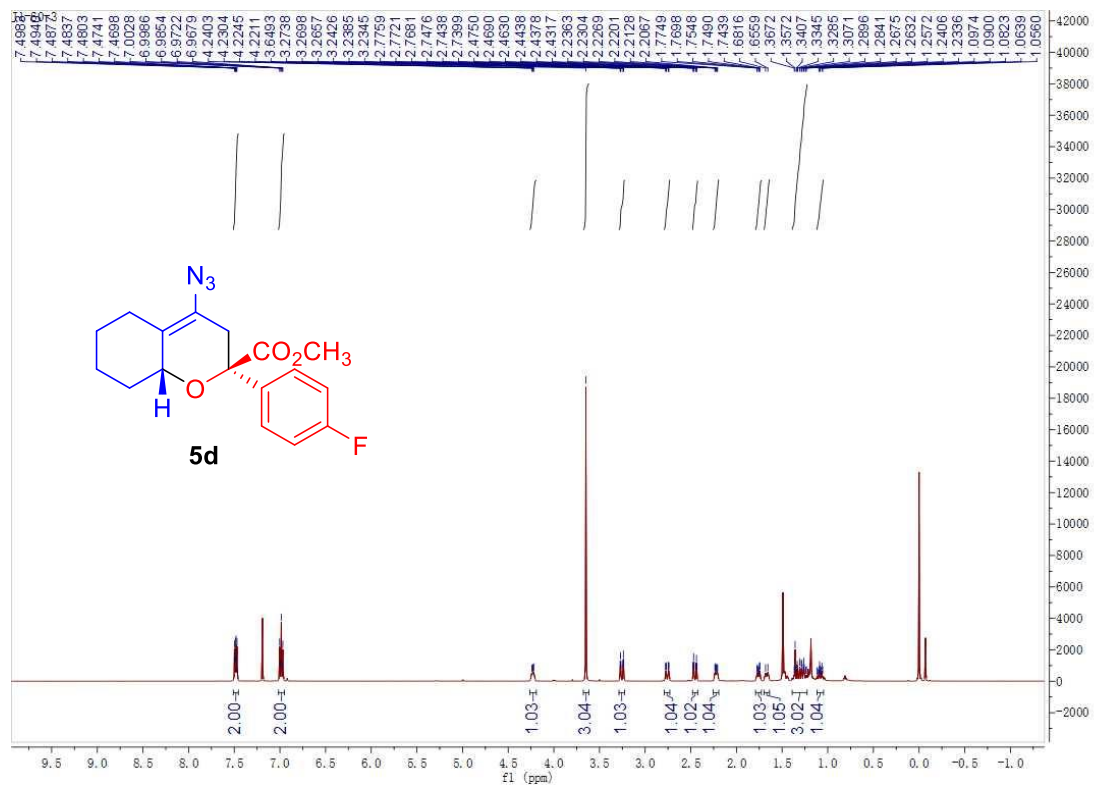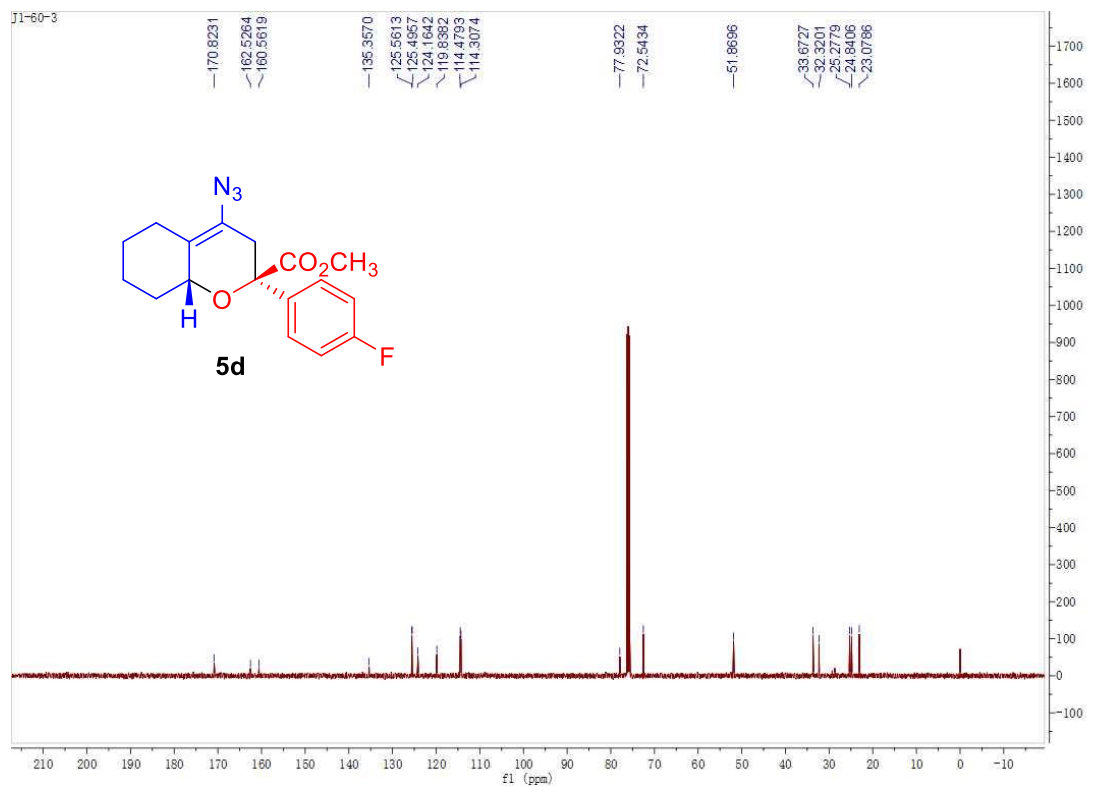



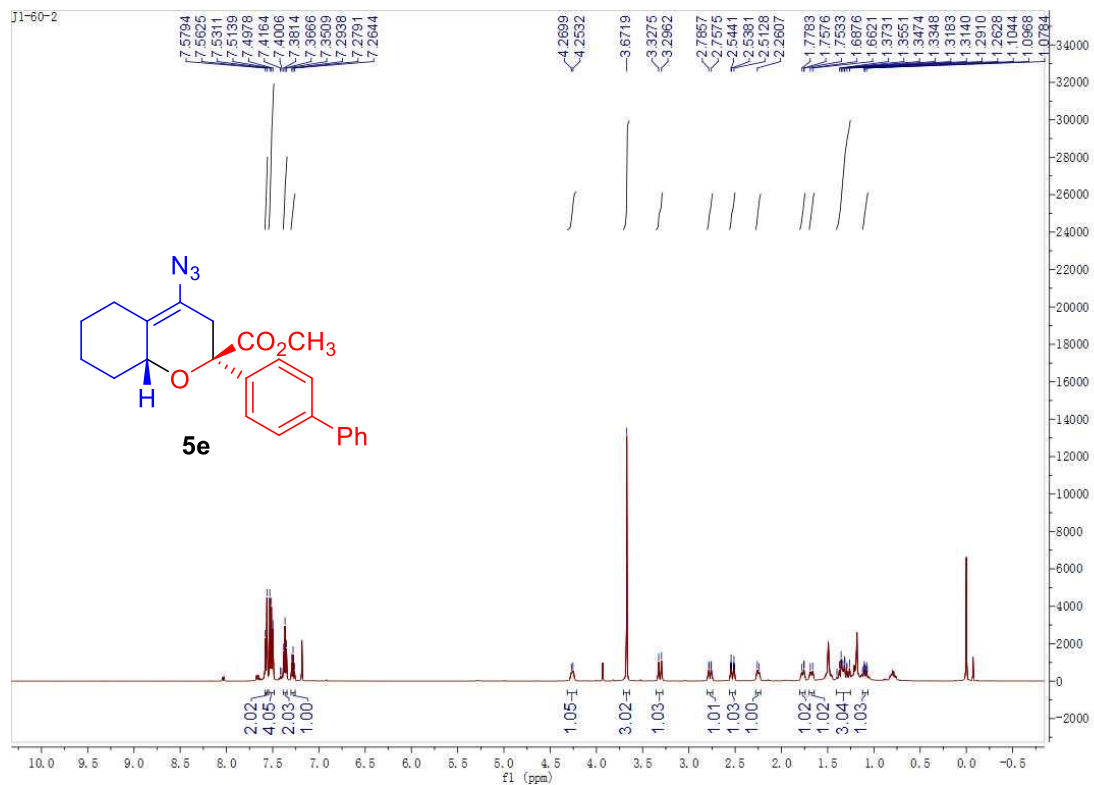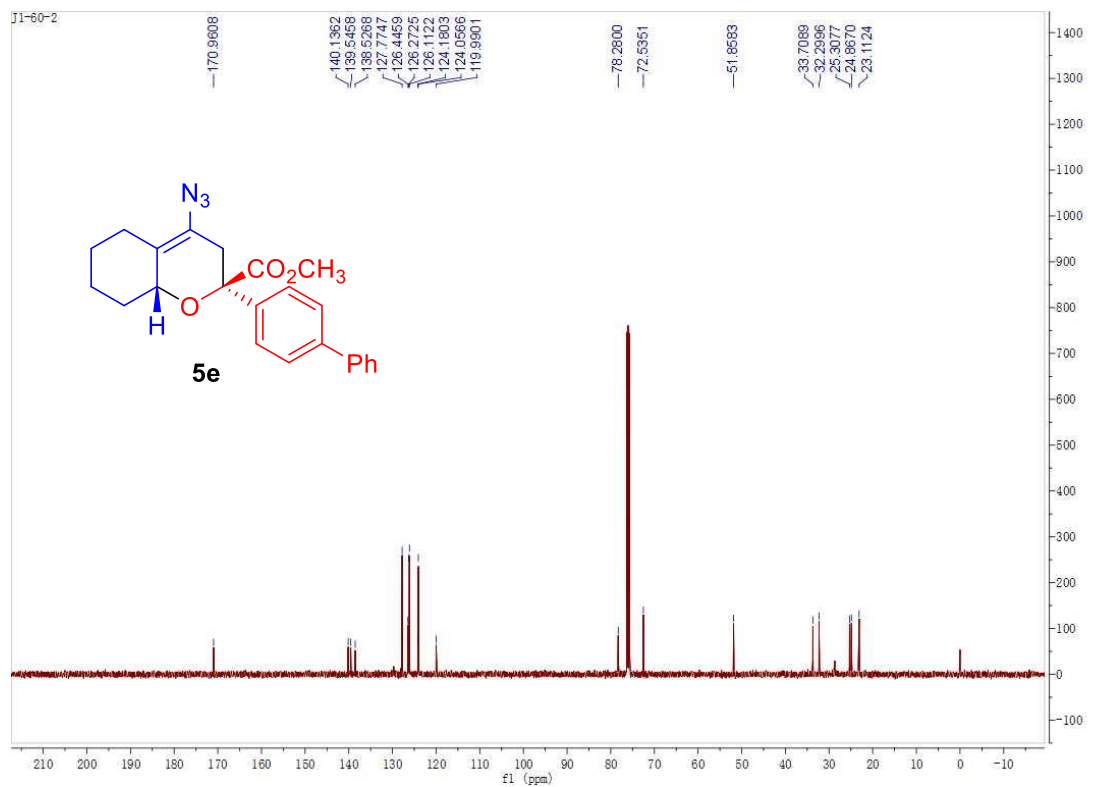



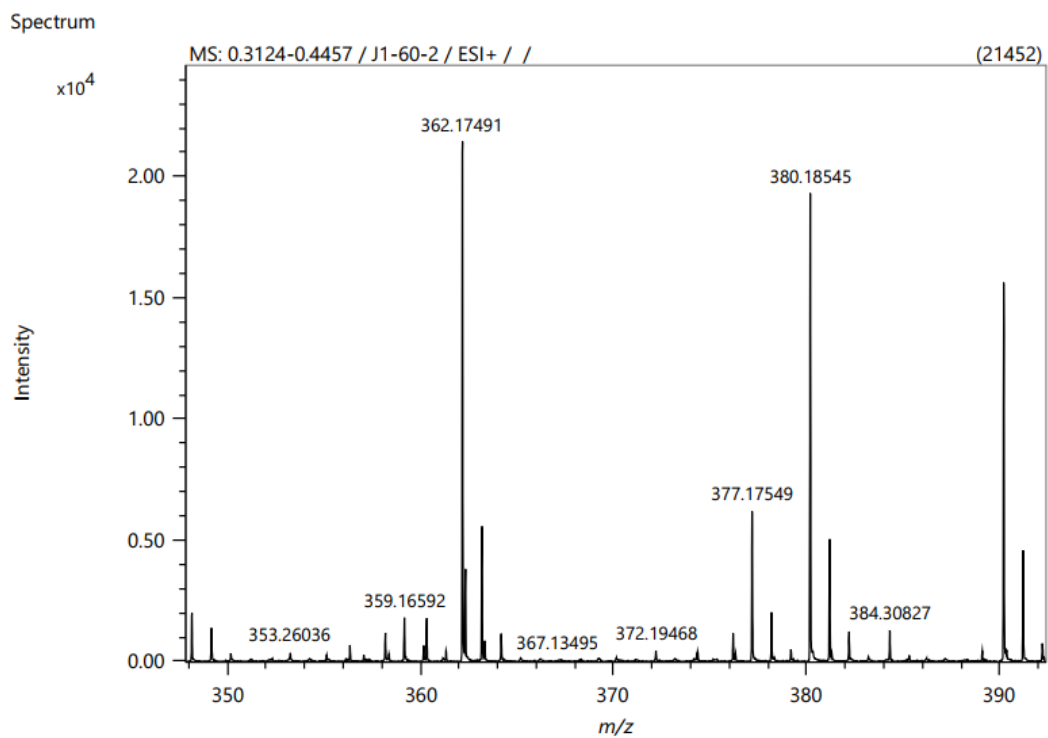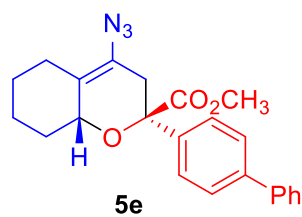

Exact Mass: 389.1739

Molecular Weight: 389.4550

m/z: 389.1739 (100.0%), 390.1773 (24.9%), 391.1807 (2.7%), 390.1710 (1.1%)

Elemental Analysis: C, 70.93; H, 5.95; N, 10.79; O, 12.32

HRMS (ESI, m/z) calcd for  $C_{23}H_{23}N_3O_3$   $[M-N_2+H]^+$  362.17507, found 362.17491.

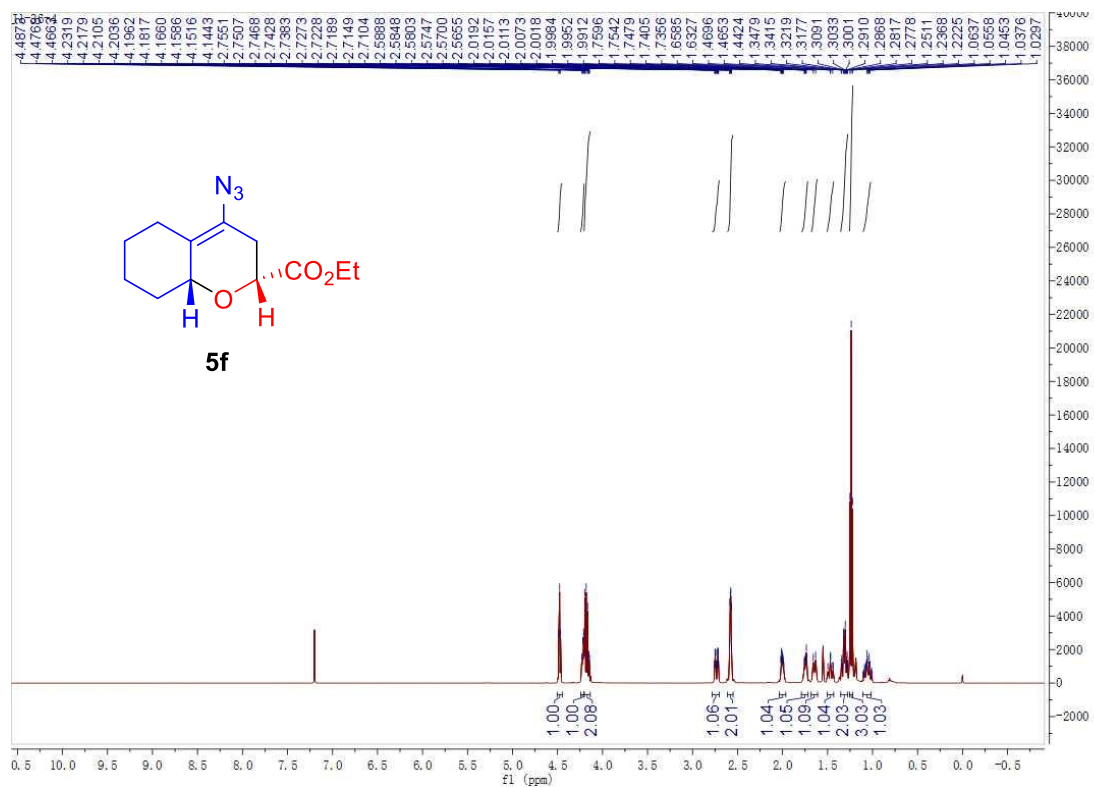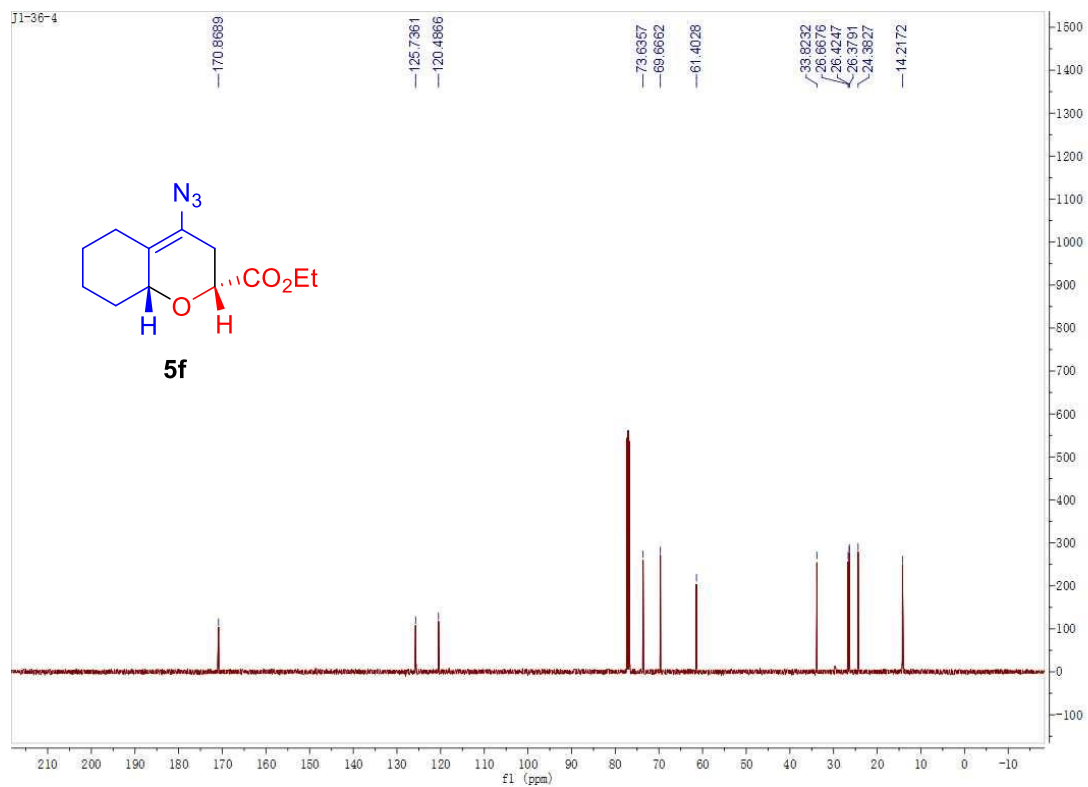

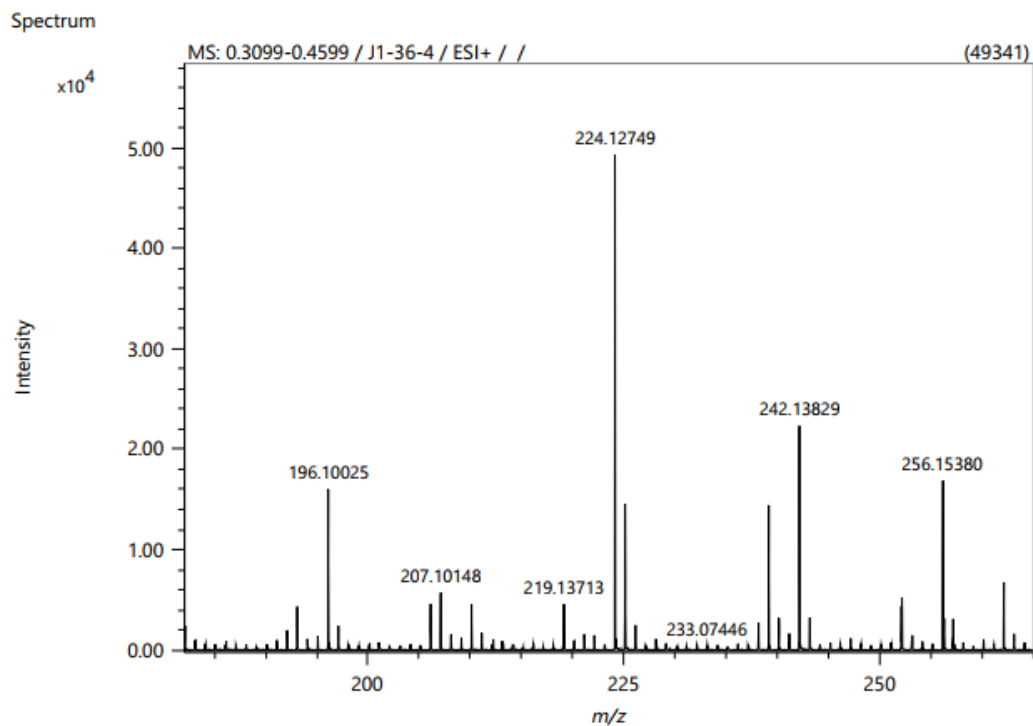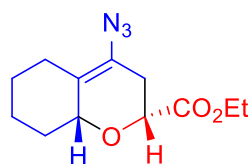

**5f**

Exact Mass: 251.1270

Molecular Weight: 251.2860

m/z: 251.1270 (100.0%), 252.1303 (13.0%), 252.1240 (1.1%)

Elemental Analysis: C, 57.36; H, 6.82; N, 16.72; O, 19.10

HRMS (ESI, m/z) calcd for  $\text{C}_{12}\text{H}_{17}\text{N}_3\text{O}_3$   $[\text{M}-\text{N}_2+\text{H}]^+$  224.12812, found 224.12749.

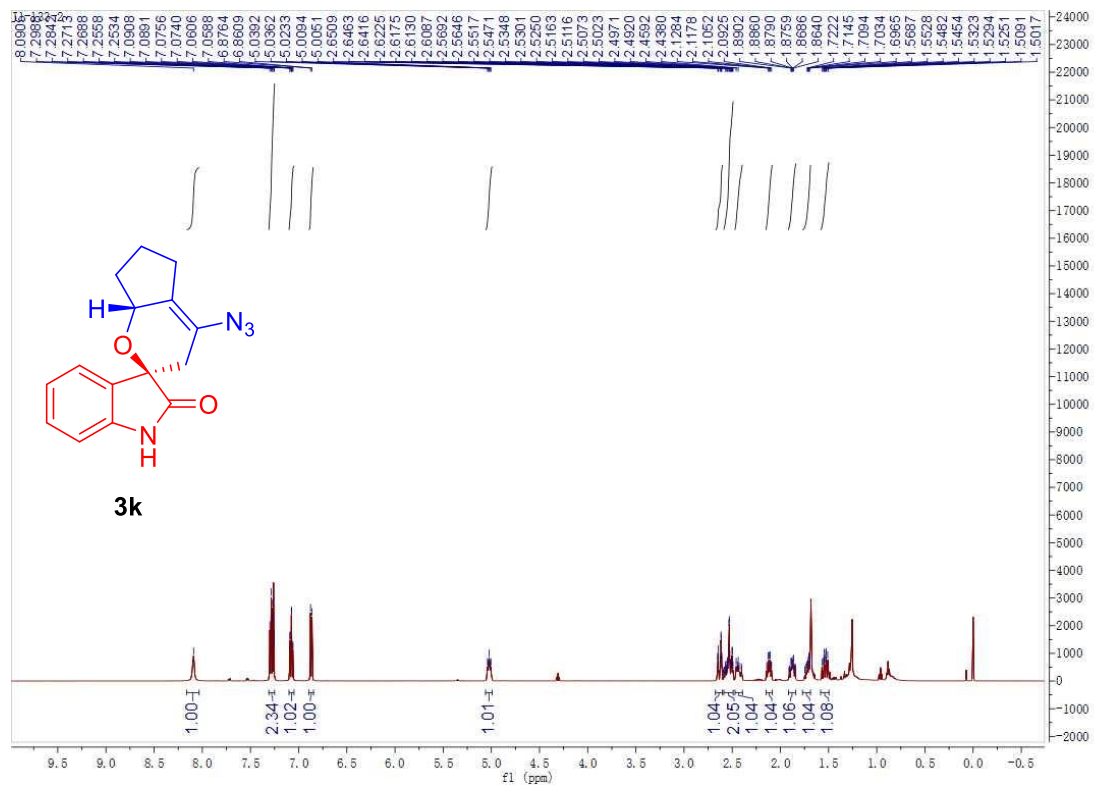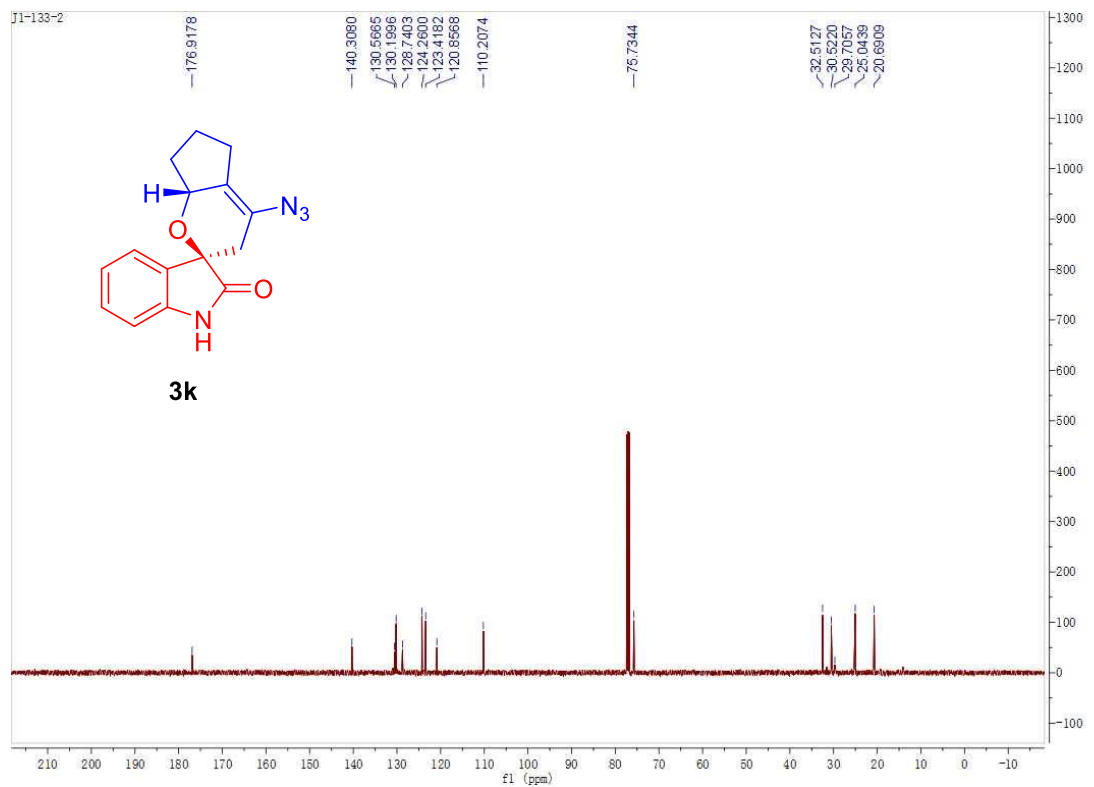

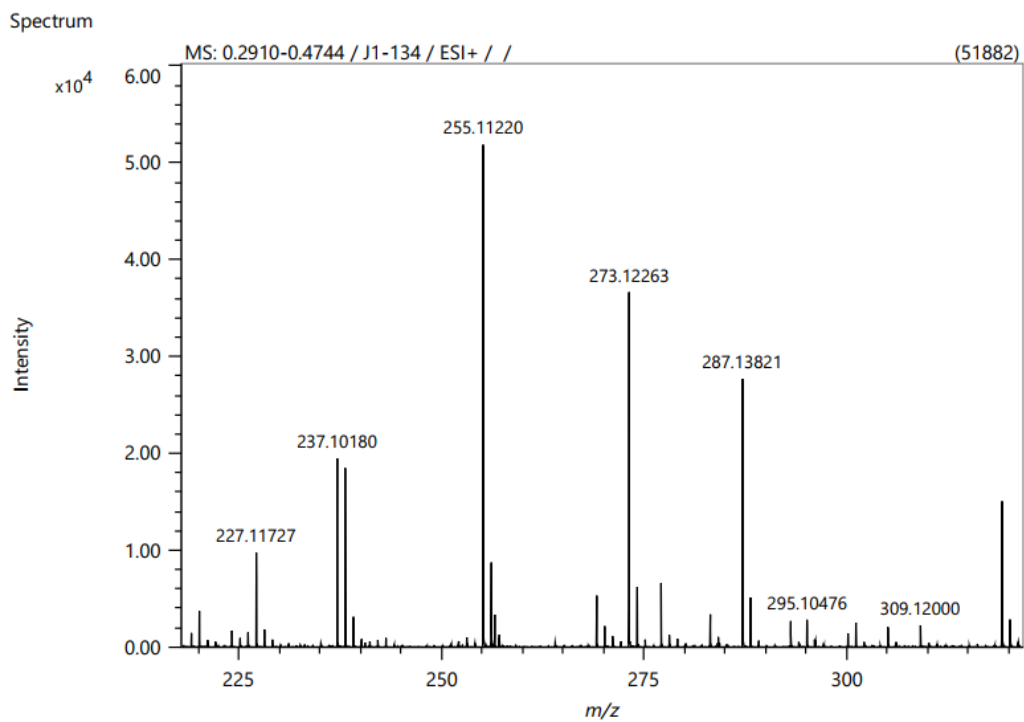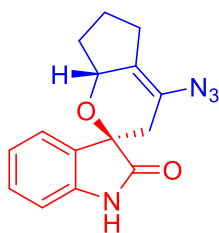

**3k**

Exact Mass: 282.1117

Molecular Weight: 282.3030

$m/z$ : 282.1117 (100.0%), 283.1150 (16.2%), 283.1087 (1.5%), 284.1184 (1.2%)

Elemental Analysis: C, 63.82; H, 5.00; N, 19.85; O, 11.33

HRMS (ESI,  $m/z$ ) calcd for  $C_{15}H_{14}N_4O_2$   $[M-N_2+H]^+$  255.11280, found 255.11220.

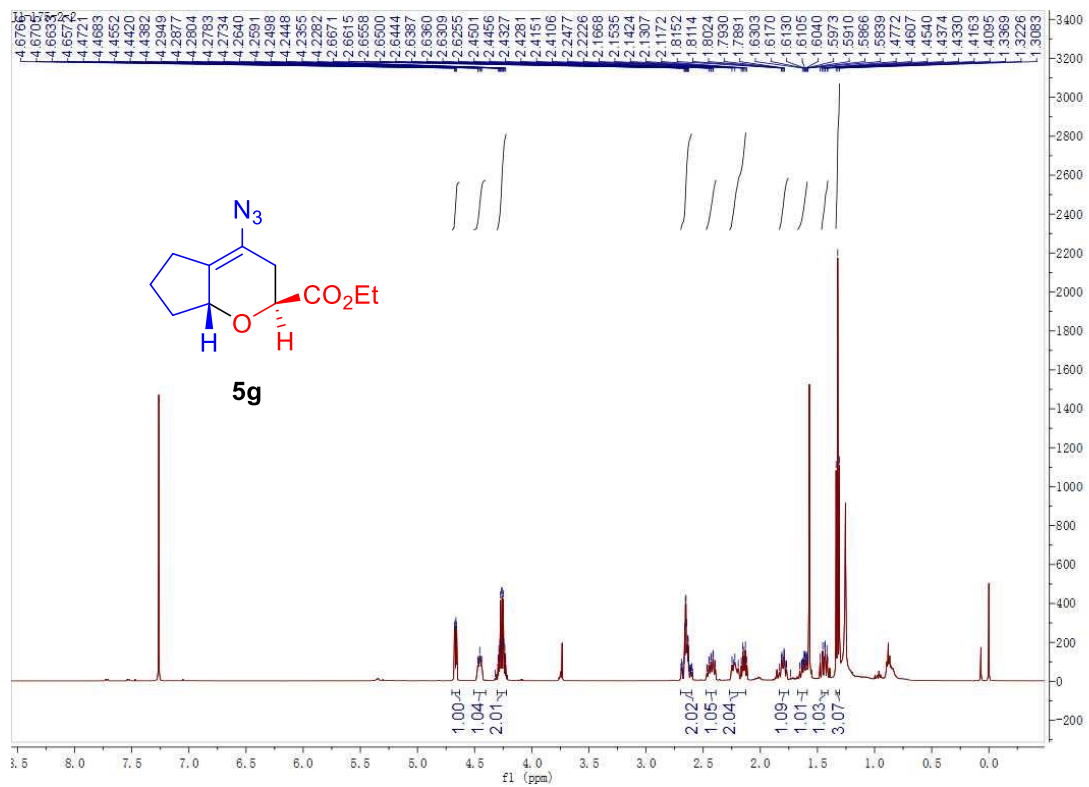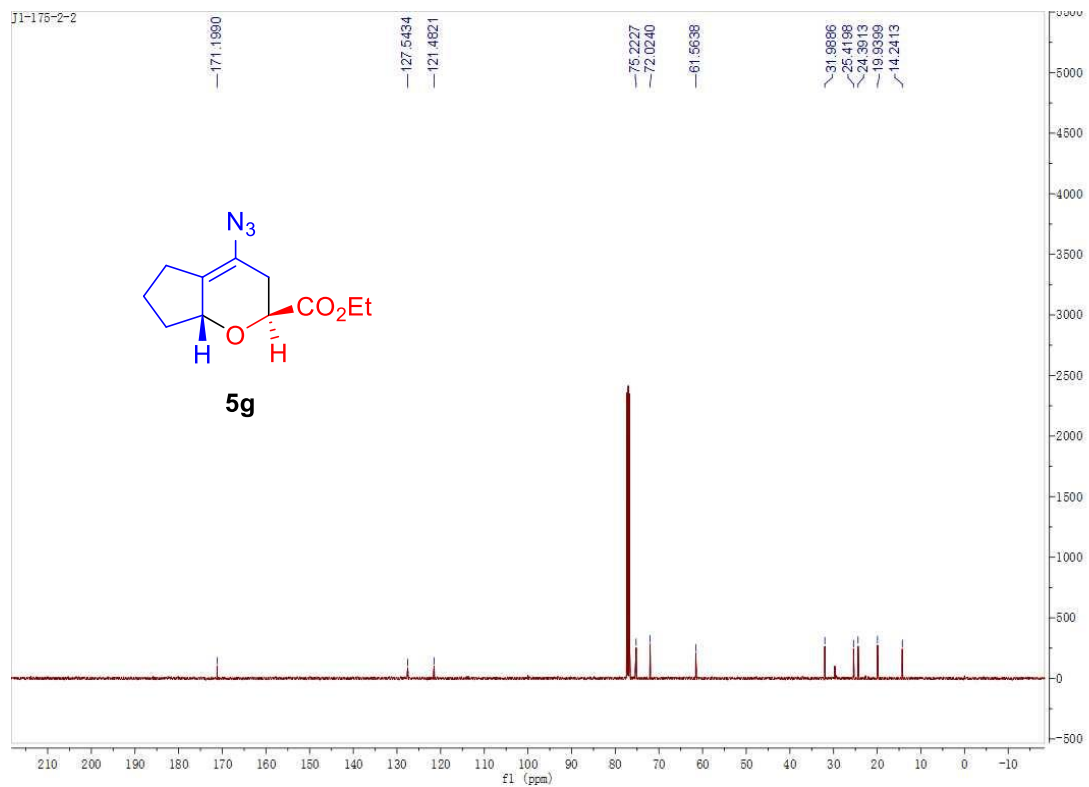

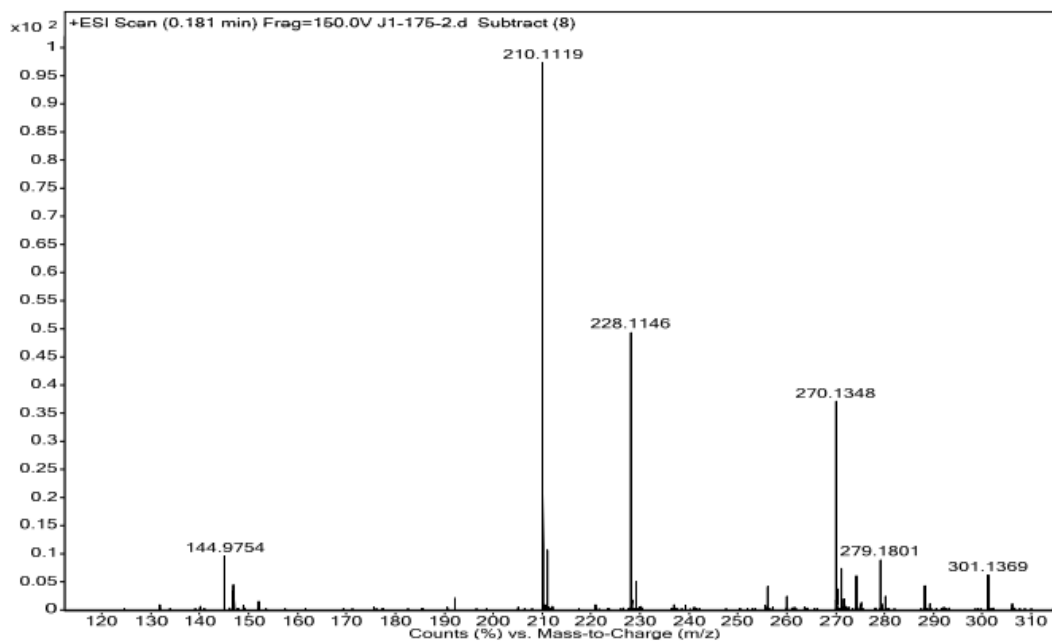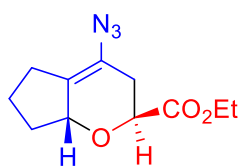

**5g**

Exact Mass: 237.1113

Molecular Weight: 237.2590

m/z: 237.1113 (100.0%), 238.1147 (11.9%), 238.1084 (1.1%)

Elemental Analysis: C, 55.69; H, 6.37; N, 17.71; O, 20.23

HRMS (ESI, m/z) calcd for  $C_{11}H_{15}N_3O_3$   $[M-N_2+H]^+$  210.1125, found 210.1119.

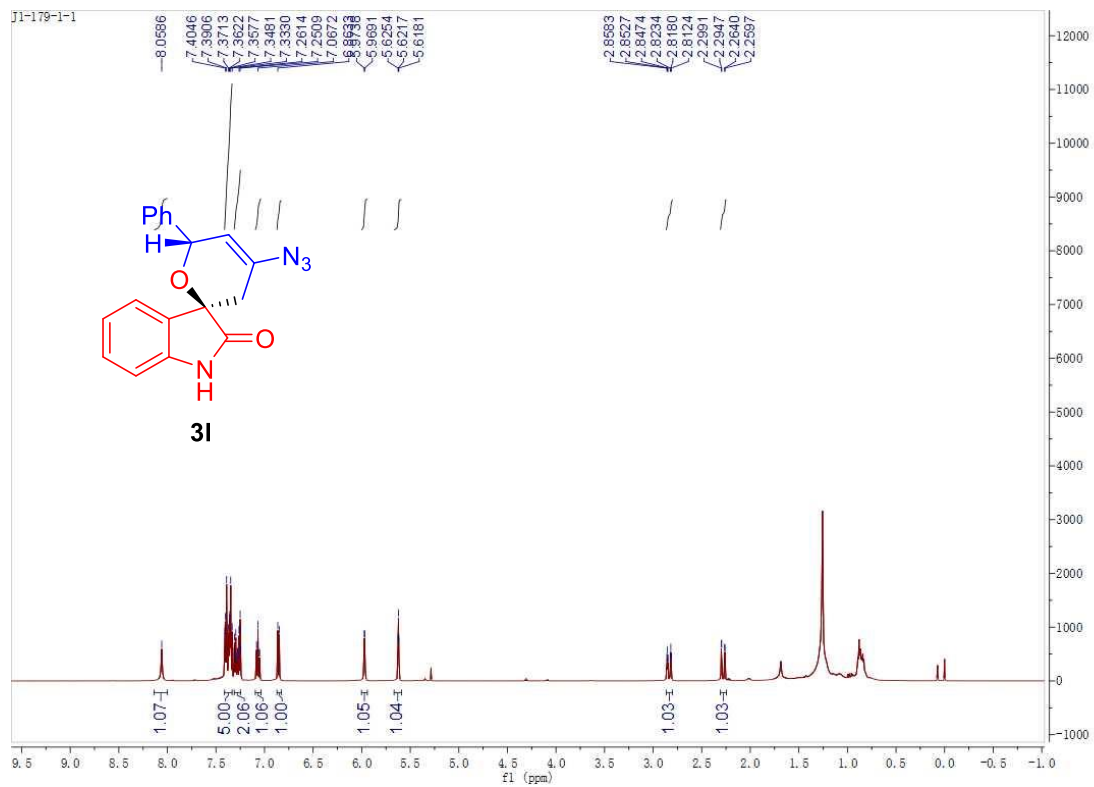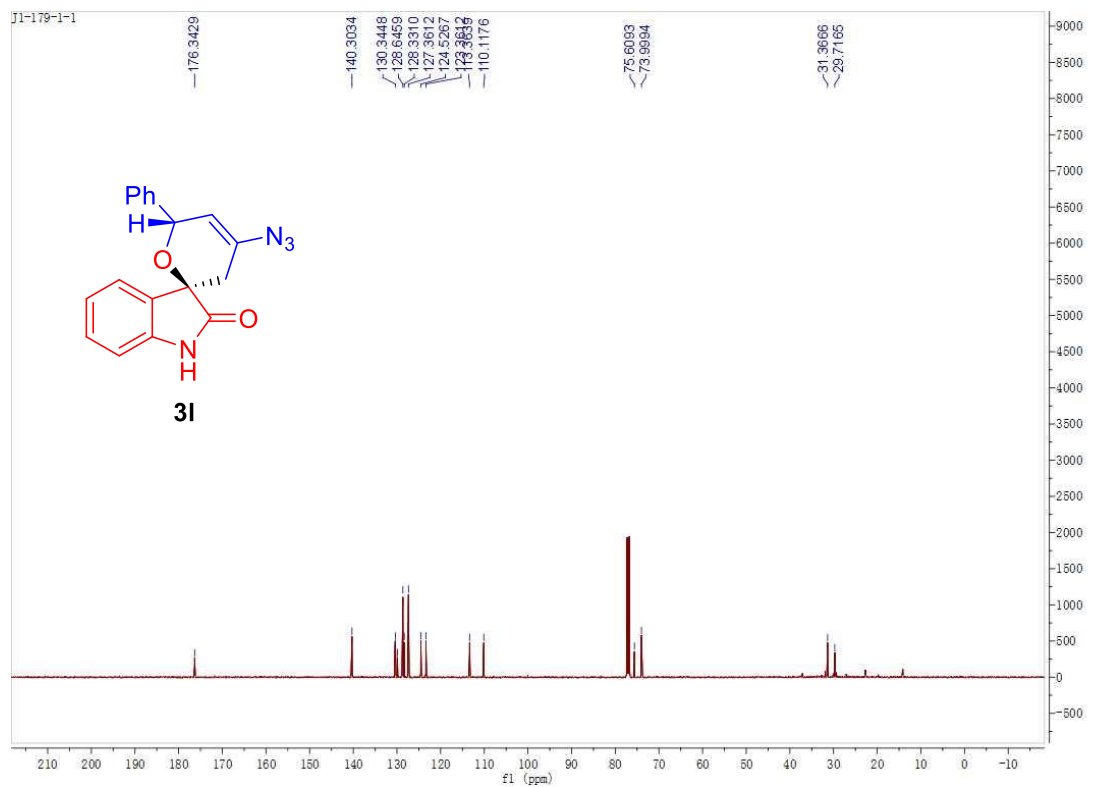



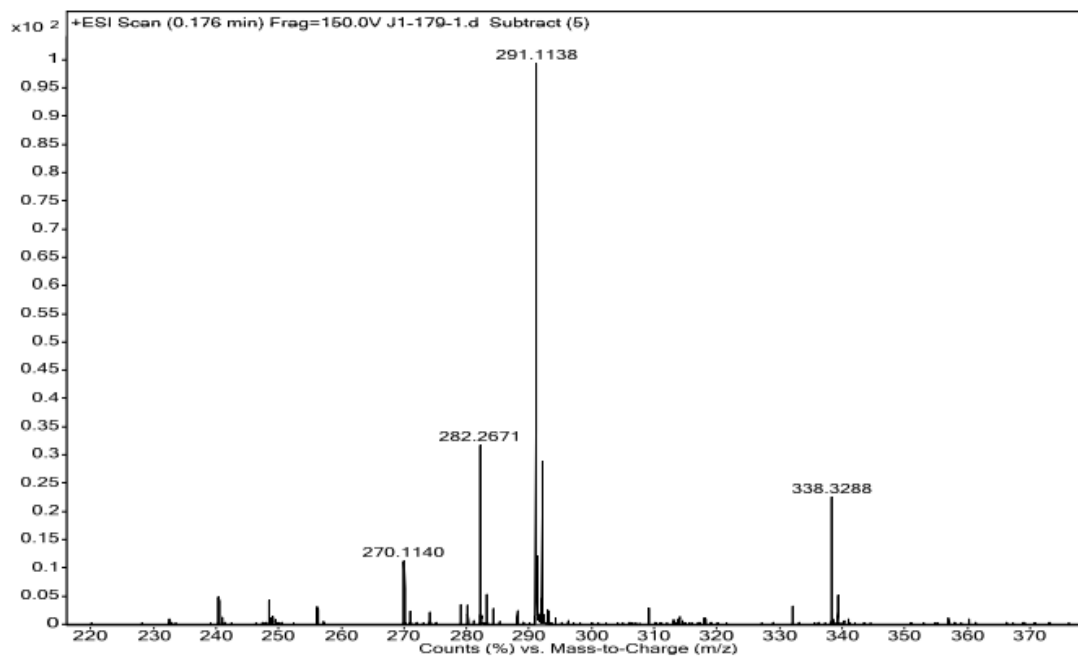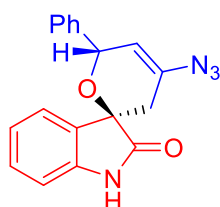

**3I**

Exact Mass: 318.1117

Molecular Weight: 318.3360

m/z: 318.1117 (100.0%), 319.1150 (19.5%), 320.1184 (1.8%), 319.1087 (1.5%)

Elemental Analysis: C, 67.92; H, 4.43; N, 17.60; O, 10.05

HRMS (ESI, m/z) calcd for C<sub>18</sub>H<sub>14</sub>N<sub>4</sub>O<sub>2</sub> [M-N<sub>2</sub>+H]<sup>+</sup> 291.1128, found 291.1138.

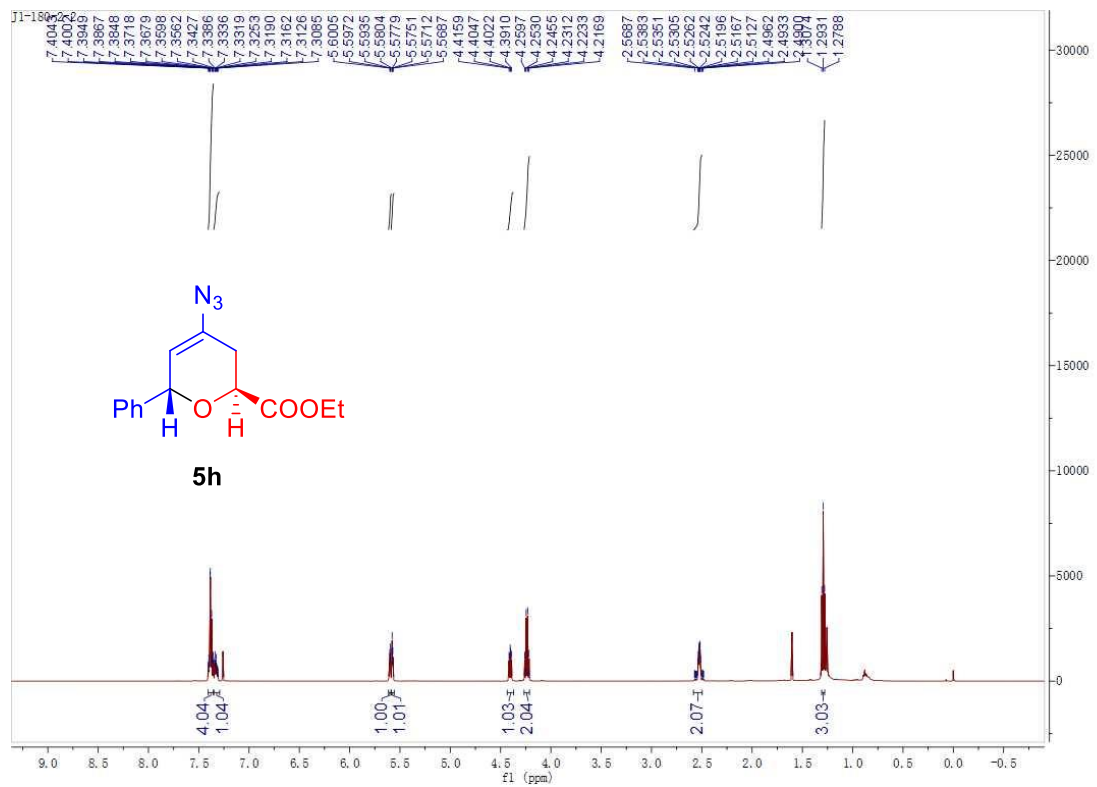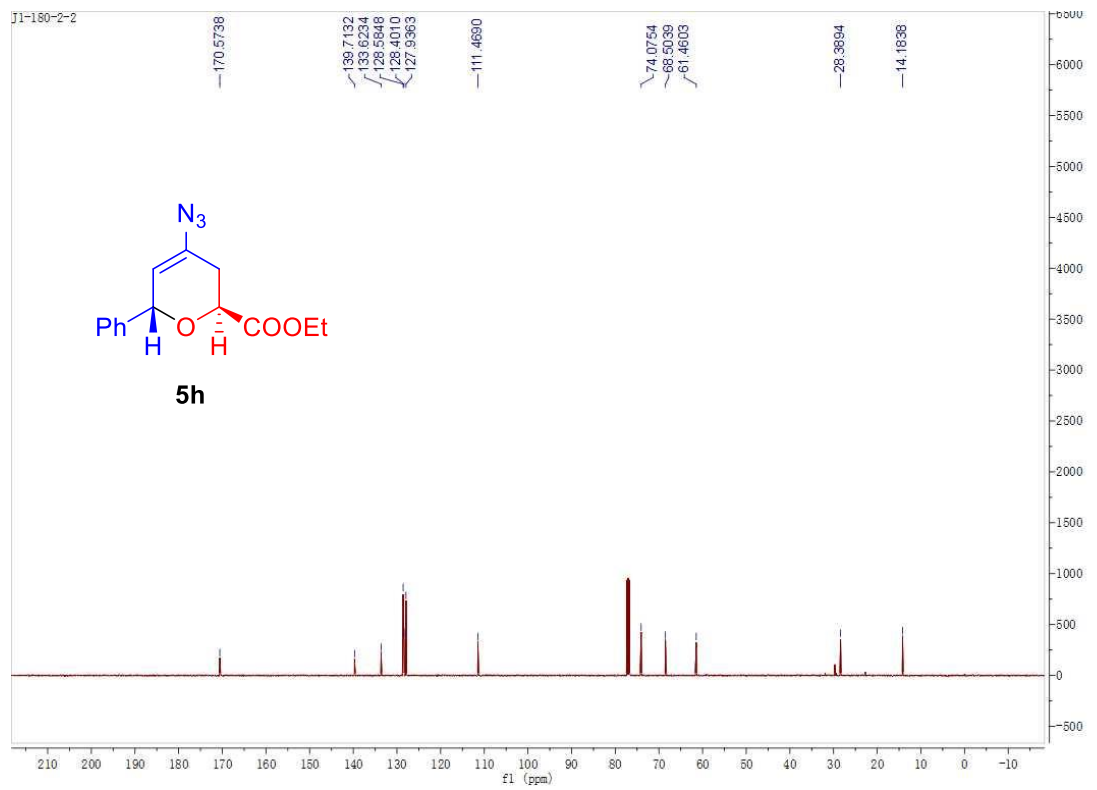

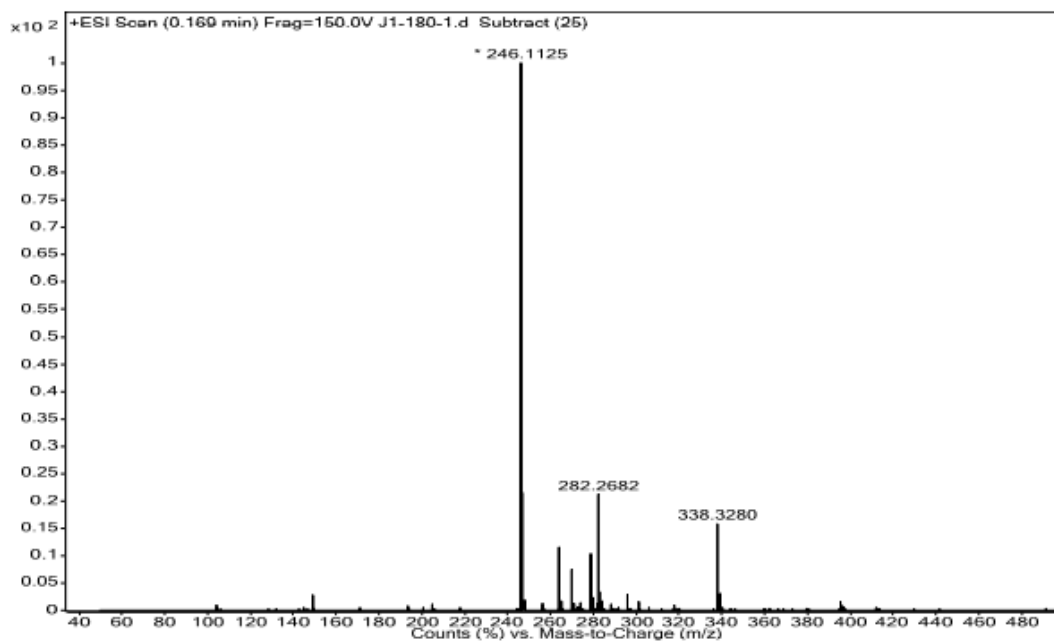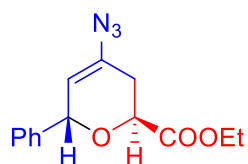

**5h**

Exact Mass: 273.1113

Molecular Weight: 273.2920

m/z: 273.1113 (100.0%), 274.1147 (15.1%), 274.1084 (1.1%), 275.1181 (1.1%)

Elemental Analysis: C, 61.53; H, 5.53; N, 15.38; O, 17.56

HRMS (ESI, m/z) calcd for  $C_{14}H_{15}N_3O_3$   $[M-N_2+H]^+$  246.1125, found 246.1125.

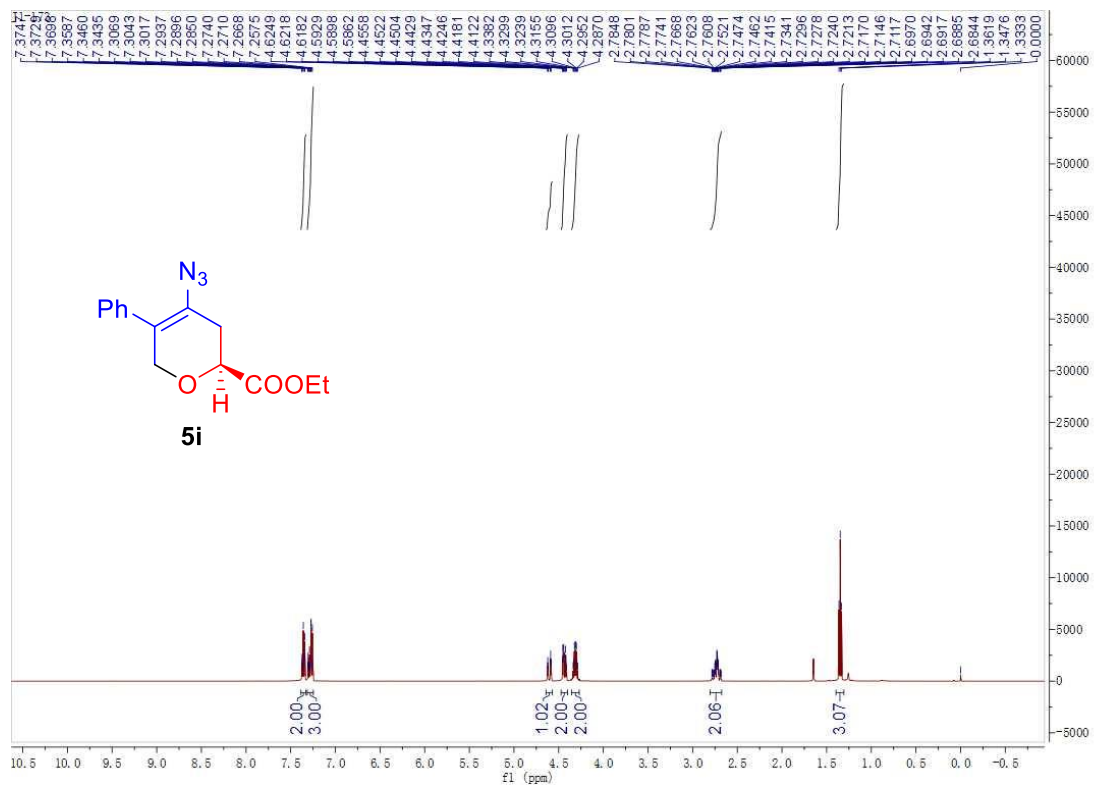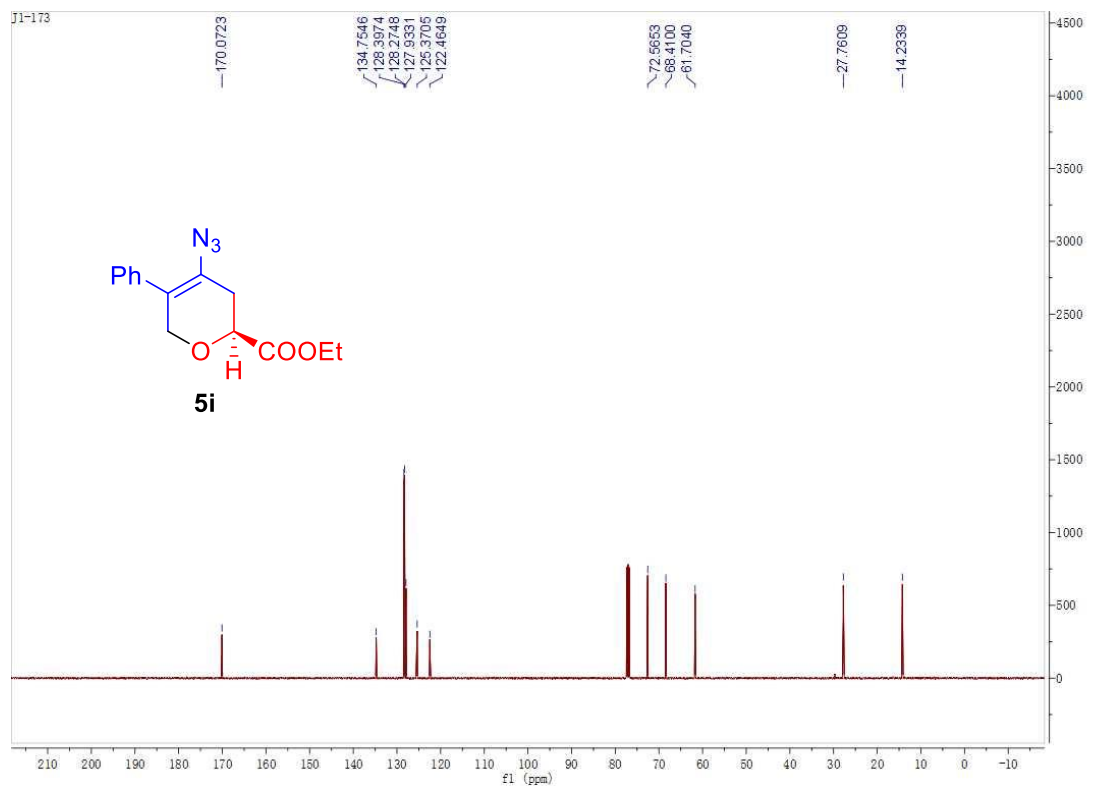

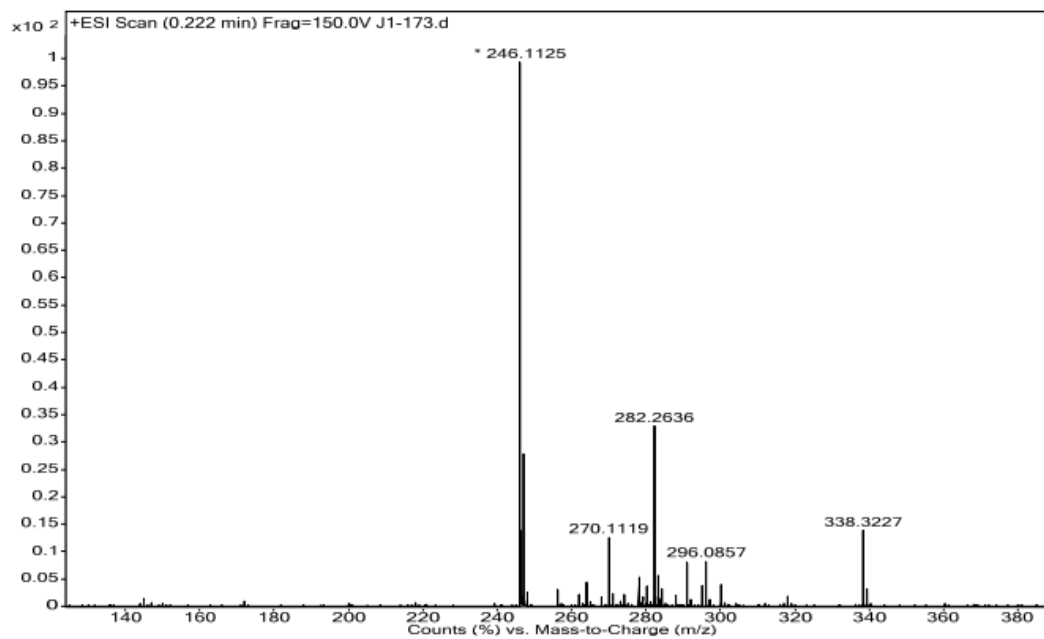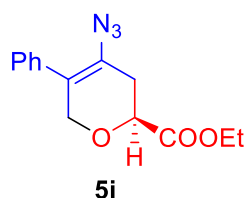

Exact Mass: 273.1113

Molecular Weight: 273.2920

m/z: 273.1113 (100.0%), 274.1147 (15.1%), 274.1084 (1.1%), 275.1181 (1.1%)

Elemental Analysis: C, 61.53; H, 5.53; N, 15.38; O, 17.56

HRMS (ESI, m/z) calcd for  $C_{14}H_{15}N_3O_3$   $[M-N_2+H]^+$  246.1125, found 246.1125.

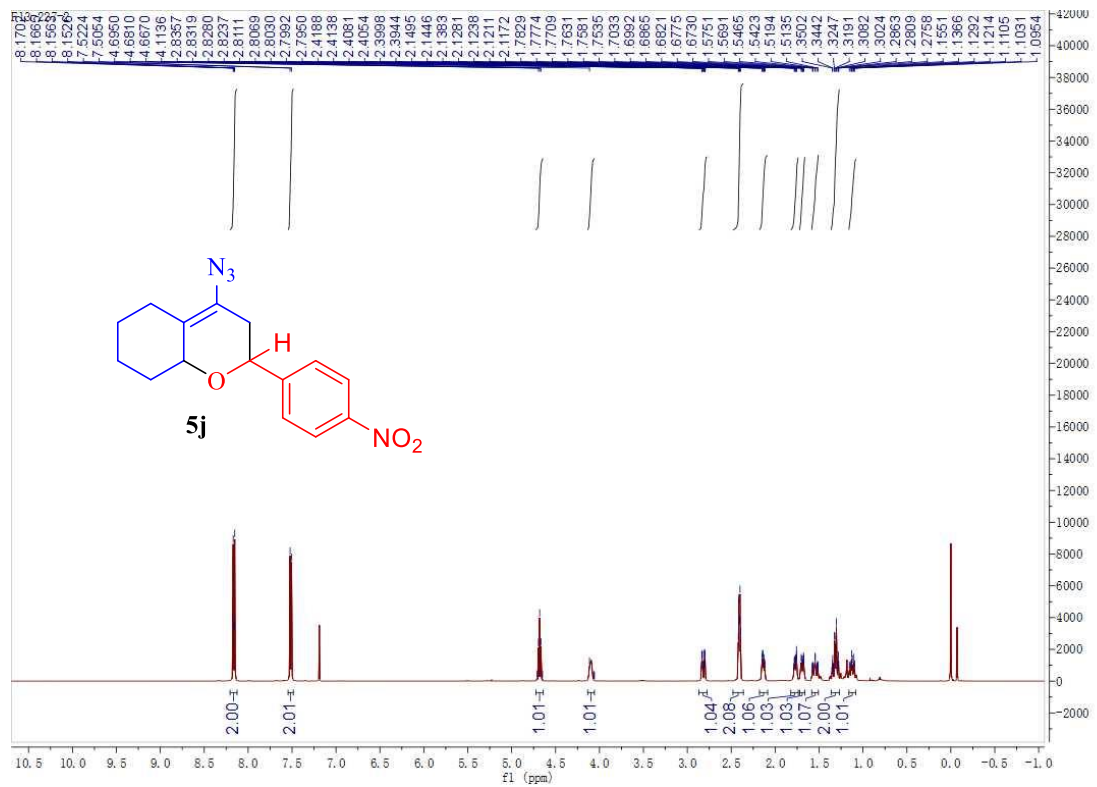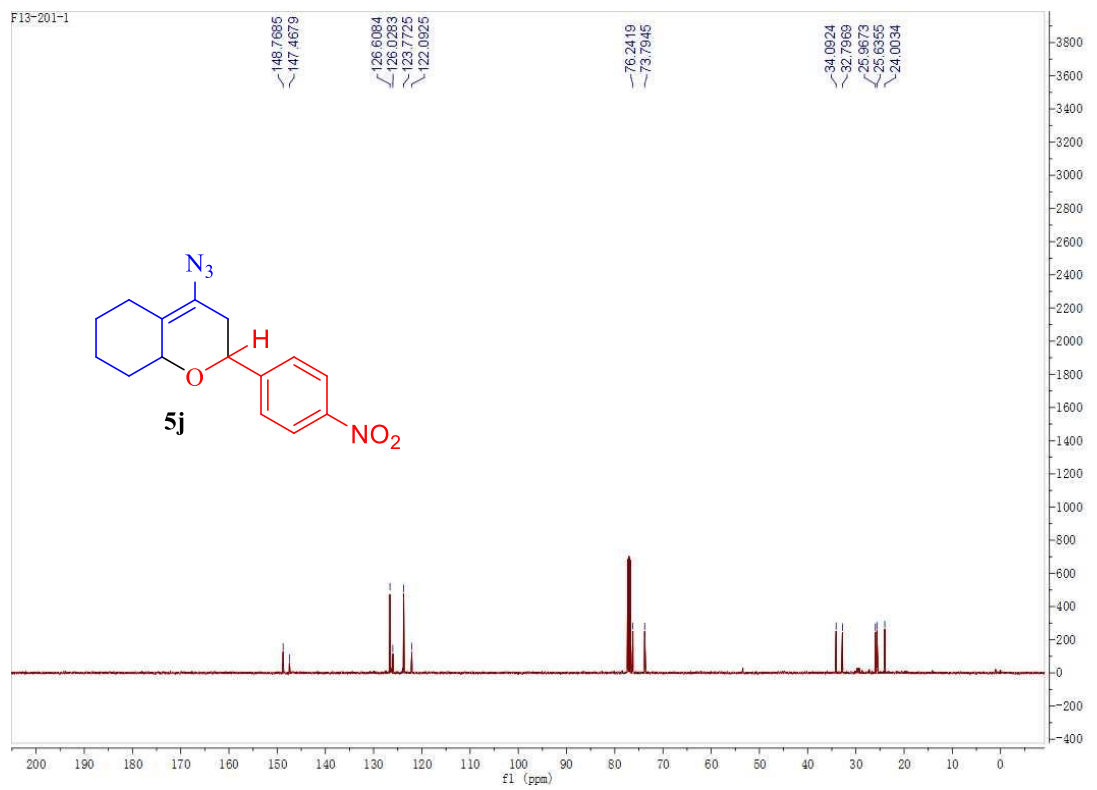

| Sample Name   | Position    | Instrument Name | Instrument 1         | User Name              |
|---------------|-------------|-----------------|----------------------|------------------------|
| F13-201-1     | P1-C7       |                 | Instrument 1         |                        |
| Inj Vol       | InjPosition | SampleType      | Sample               | IRM Calibration Status |
| -1            |             |                 | Sample               | Success                |
| Data Filename | ACQ Method  | Comment         | Acquired Time        |                        |
| F13-201-1.d   | 0103.m      |                 | 7/20/2020 3:29:51 PM |                        |

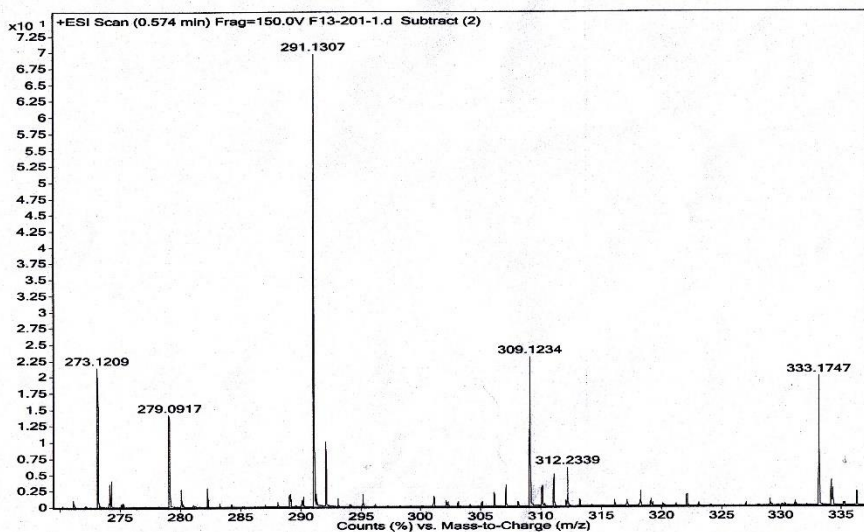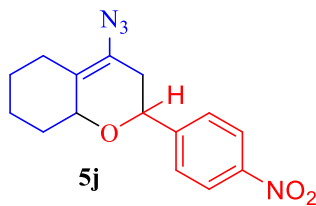

Exact Mass: 300.1222

Molecular Weight: 300.3180

m/z: 300.1222 (100.0%), 301.1256 (16.2%), 301.1193 (1.5%), 302.1290 (1.2%)

Elemental Analysis: C, 59.99; H, 5.37; N, 18.66; O, 15.98

HRMS (ESI, m/z) calcd for C<sub>15</sub>H<sub>16</sub>N<sub>4</sub>O<sub>3</sub> [M-N<sub>2</sub>+H]<sup>+</sup> 273.1234, found 273.1209.

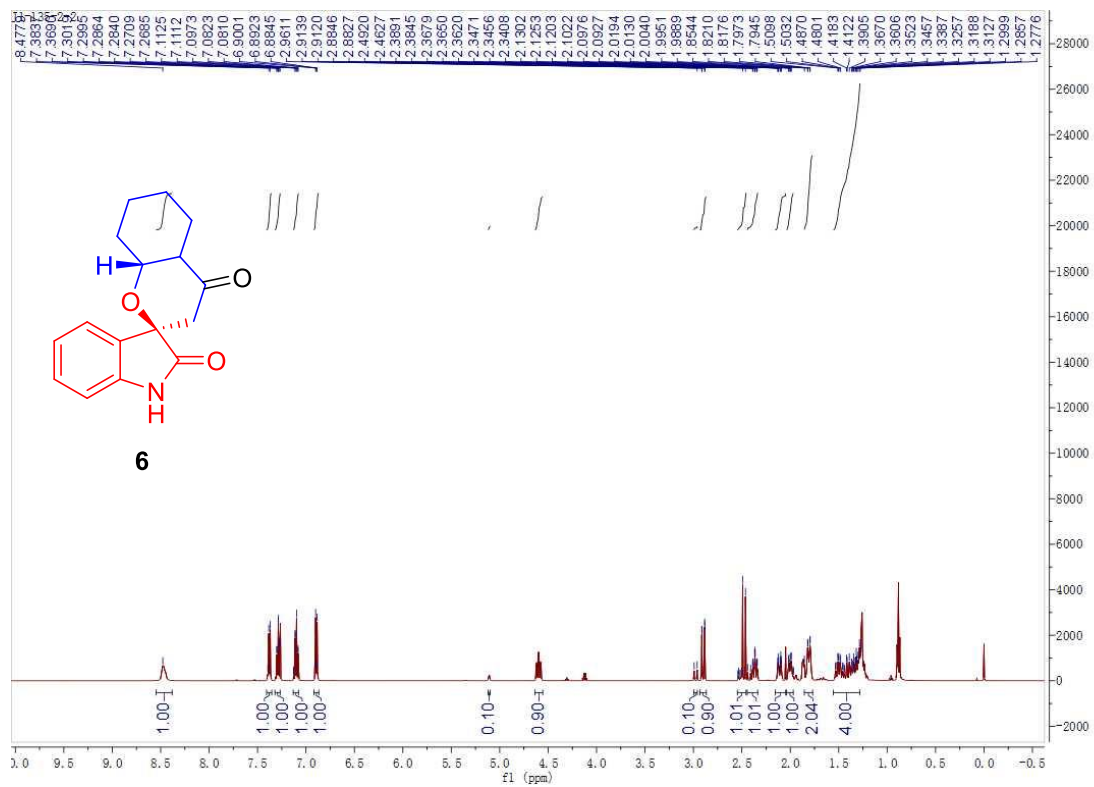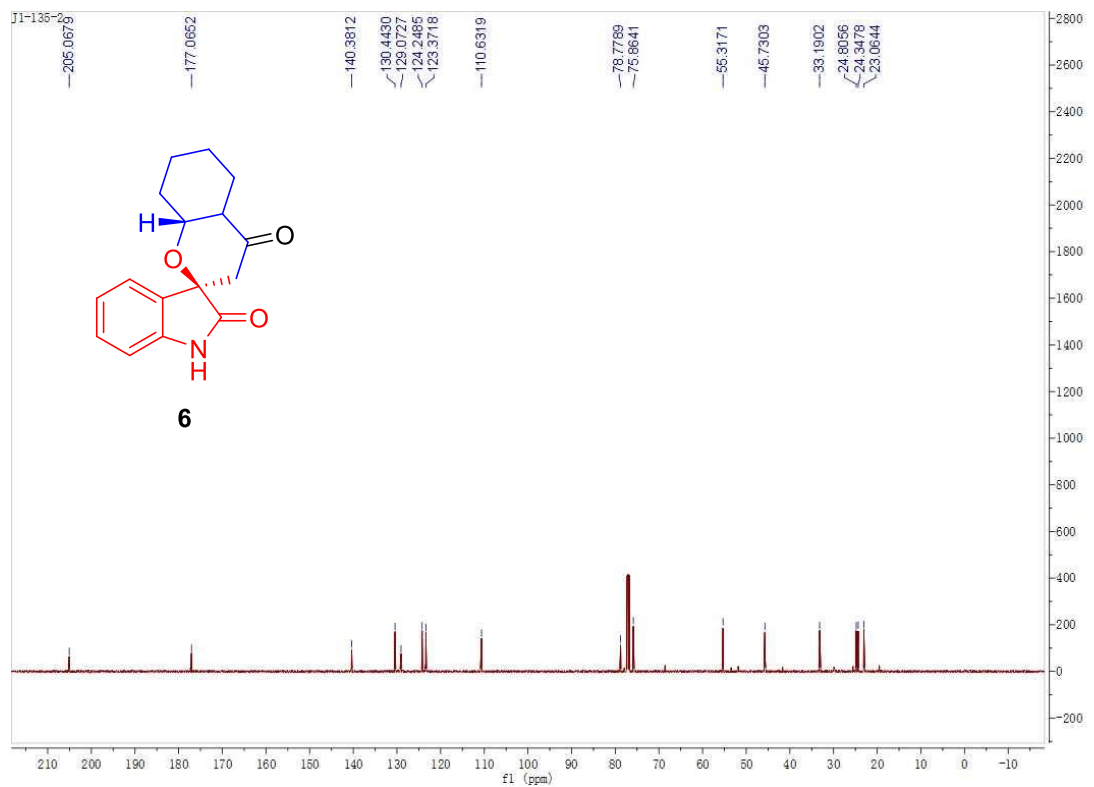



| Sample Name   | Unavailable | Position    | Unavailable | Instrument Name | Unavailable                       | User Name              | Unavailable |
|---------------|-------------|-------------|-------------|-----------------|-----------------------------------|------------------------|-------------|
| Inj Vol       | Unavailable | InjPosition | Unavailable | SampleType      | Unavailable                       | IRM Calibration Status | Success     |
| Data Filename | J1-135-1.d  | ACQ Method  | Unavailable | Comment         | Sample information is unavailable | Acquired Time          | Unavailable |

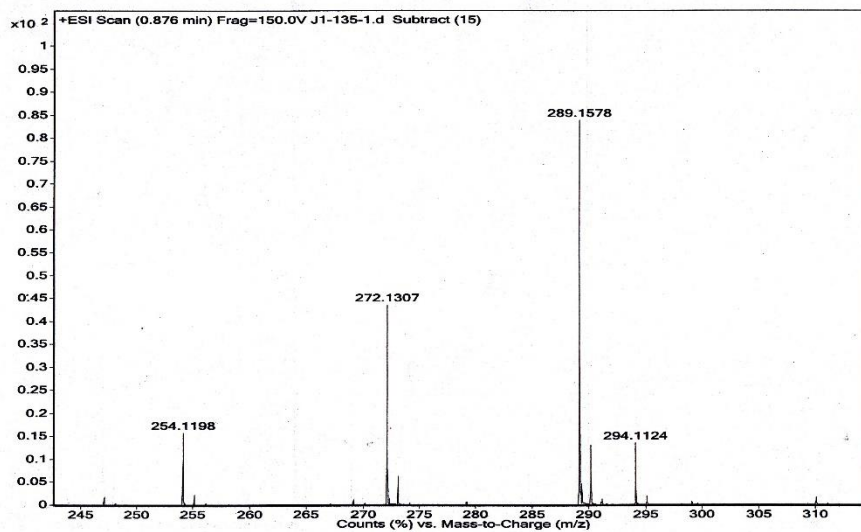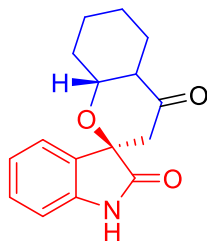

6

Exact Mass: 271.1208

Molecular Weight: 271.3160

m/z: 271.1208 (100.0%), 272.1242 (17.3%), 273.1276 (1.4%)

Elemental Analysis: C, 70.83; H, 6.32; N, 5.16; O, 17.69

HRMS (ESI, m/z) calcd for C<sub>16</sub>H<sub>17</sub>NO<sub>3</sub> [M+H]<sup>+</sup> 272.1281, found 272.1307.

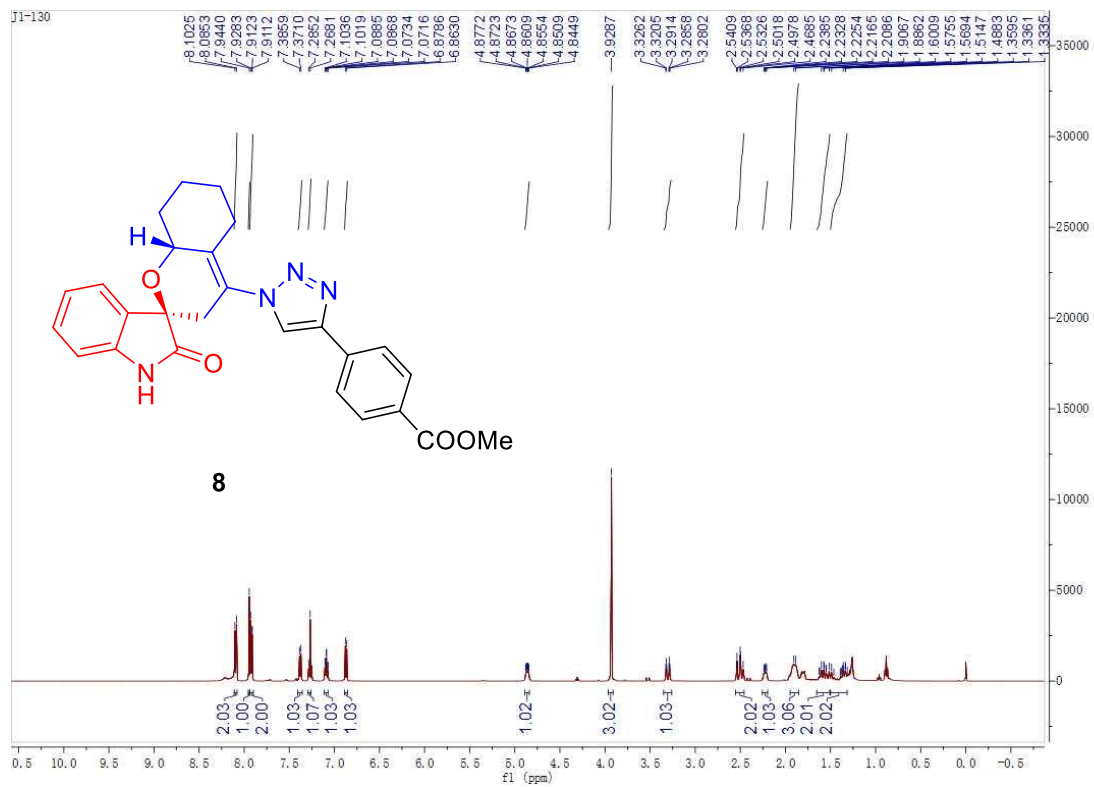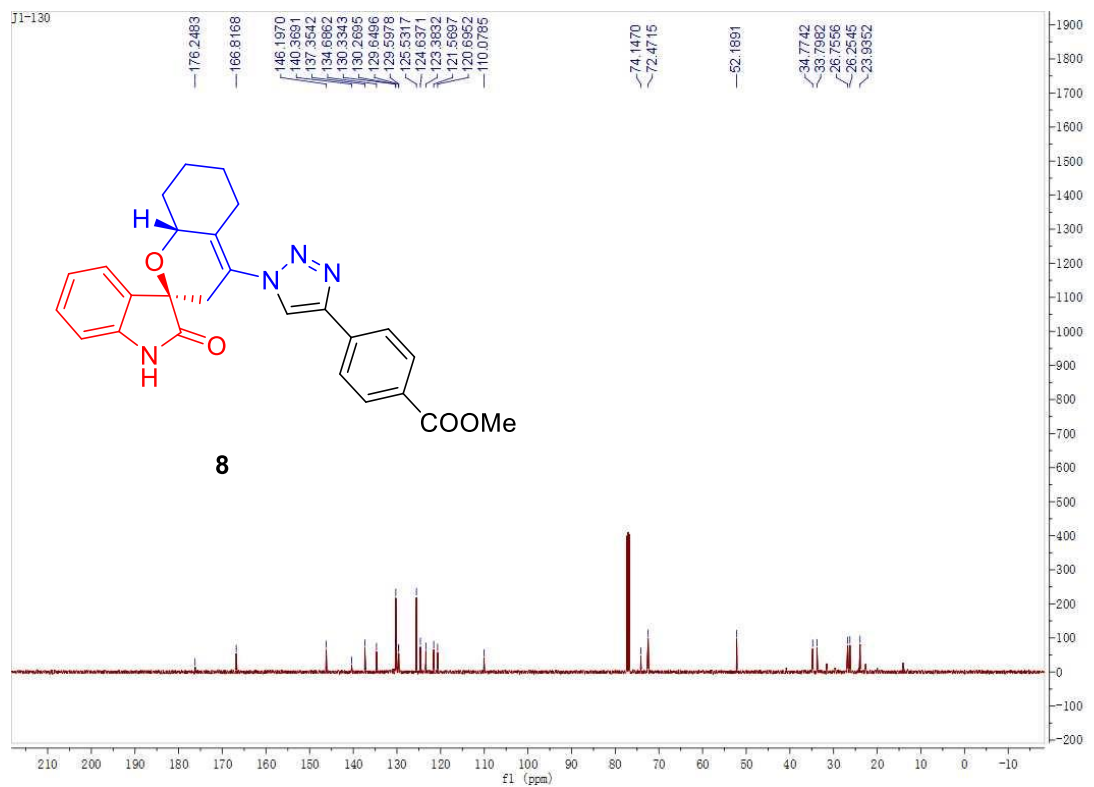

| Sample Name   | Position    | Instrument Name | Instrument 1         | User Name              |
|---------------|-------------|-----------------|----------------------|------------------------|
| J1-103        | P1-A4       |                 |                      |                        |
| Inj Vol       | InjPosition | SampleType      | Sample               | IRM Calibration Status |
| -1            |             |                 |                      | Success                |
| Data Filename | ACQ Method  | Comment         | Acquired Time        |                        |
| J1-103.d      | 0103.m      |                 | 11/7/2019 3:15:50 PM |                        |

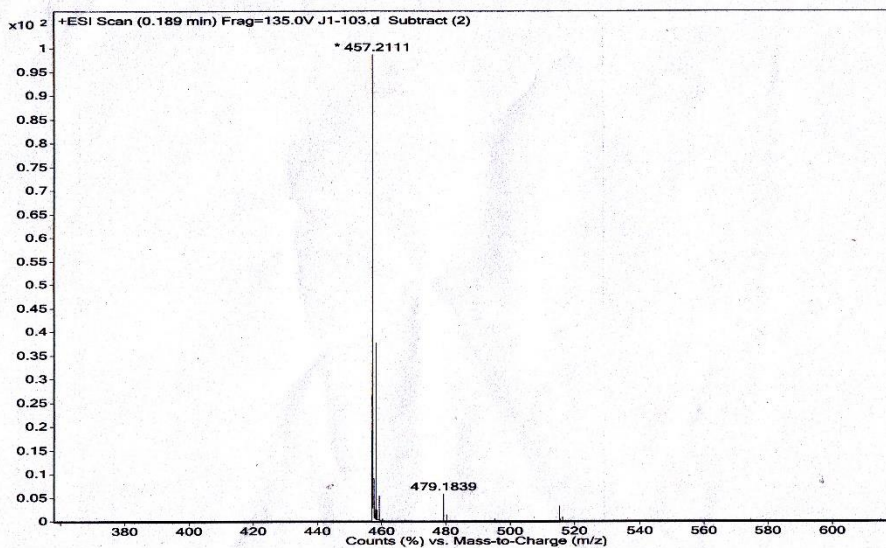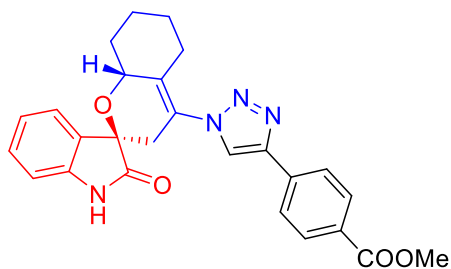

8

Exact Mass: 456.1798

Molecular Weight: 456.5020

m/z: 456.1798 (100.0%), 457.1831 (28.1%), 458.1865 (2.7%), 457.1768 (1.5%), 458.1865 (1.1%)

Elemental Analysis: C, 68.41; H, 5.30; N, 12.27; O, 14.02

HRMS (ESI, m/z) calcd for C<sub>26</sub>H<sub>24</sub>N<sub>4</sub>O<sub>4</sub> [M+H]<sup>+</sup> 457.1870, found 457.2111.

## 8. References

- [1] Z. Liu, P. Liao, X. Bi, *Org. Lett.* **2014**, *16*, 3668-3671.
- [2] B. Bennacer, M. Fujiwara, S – Y. Lee, L. Pjima, *J. AM. CHEM. SOC.* **2005**, *127*, 17756-17767.
- [3] J. Li, W. Kong, C. Fu, S. Ma, *J. Org. Chem.* **2009**, *74*, 5104–5106.
- [4] Q. Li, X. Jiang, C. Fu, S. Ma, *Org. Lett.* **2011**, *13*, 466-469.
- [5] S. Li, T. Xiao, D. Li, X. Zhang, *Org. Lett.* **2015**, *17*, 3782-3785.
- [6] Z. Yu, X. Liu, Z. Dong, M. Xie, X. Feng, *Angew. Chem. Int. Ed.* **2008**, *47*, 1308-1311.
